# Supplementary material
Source: PubMed Central journal article supplement (PMC5708128)
Supplement: NIHMS839344-supplement-Supplementary_Material.pdf [file NIHMS839344-supplement-Supplementary_Material.pdf]

# Web-based Supplementary Materials for “Statistical Significance for Hierarchical Clustering”

Patrick K. Kimes, Yufeng Liu, D. Neil Hayes, and J. S. Marron

## Web Appendix A: Proofs

### Proof of Theorem 1

Let  $d_W(\cdot, \cdot)$  denote the Ward’s linkage function defined over sets of observation indices. Additionally, let  $\mathbb{X}^{(1)}$  and  $\mathbb{X}^{(2)}$  denote  $n$  and  $m$  samples drawn from two Gaussian components with distributions  $N(\boldsymbol{\mu}_1, \sigma_1^2 \mathbf{I}_p)$  and  $N(\boldsymbol{\mu}_2, \sigma_2^2 \mathbf{I}_p)$ , with corresponding observation index sets,  $\mathbb{C}^{(1)}$  and  $\mathbb{C}^{(2)}$ . For  $k = 1, 2$ , let  $C_0^{(k)}$ ,  $C_1^{(k)}$  and  $C_2^{(k)}$  denote subsets of  $\mathbb{C}^{(k)}$ , where  $C_1^{(k)}$  and  $C_2^{(k)}$  are necessarily disjoint. Let  $n_0 = |C_0^{(1)}|$ ,  $n_1 = |C_1^{(1)}|$ ,  $n_2 = |C_2^{(1)}|$ ,  $m_0 = |C_0^{(2)}|$ ,  $m_1 = |C_1^{(2)}|$  and  $m_2 = |C_2^{(2)}|$  denote the size of each subset. Finally, let  $\mathbf{X}_0^{(k)}$ ,  $\mathbf{X}_1^{(k)}$ , and  $\mathbf{X}_2^{(k)}$  denote the corresponding subsets of  $\mathbb{X}^{(k)}$ , with corresponding sample means,  $\bar{\mathbf{X}}_0^{(k)}$ ,  $\bar{\mathbf{X}}_1^{(k)}$ , and  $\bar{\mathbf{X}}_2^{(k)}$ .

Consider the two events:  $A = \{\max d_W(C_1^{(1)}, C_2^{(1)}) < \min d_W(C^{(1)}, C^{(2)})\}$ , and  $B = \{\max d_W(C_1^{(2)}, C_2^{(2)}) < \min d_W(C^{(1)}, C^{(2)})\}$ , where maxima and minima are taken with respect to the possible values of  $C_1^{(k)}$ ,  $C_2^{(k)}$ , and  $C^{(k)}$ . Note that the joint occurrence of  $A$  and  $B$  is sufficient for correctly separating observations from the two components at the root node. It therefore suffices to show that  $P(A \cap B) \rightarrow 1$  as  $p \rightarrow \infty$ .

For some  $0 < a_1 \leq a_2$ , define the following events:  $E_1 = \{\max d_W(C_1^{(1)}, C_2^{(1)}) < a_1 \cdot p\}$ ,  $E_2 = \{\max d_W(C_1^{(2)}, C_2^{(2)}) < a_1 \cdot p\}$ ,  $E_3 = \{\min d_W(C_0^{(1)}, C_0^{(2)}) > a_2 \cdot p\}$ . Note that the

probability of the joint event  $(A \cap B)$  can be bounded below by:

$$\begin{aligned} P(A \cap B) &= 1 - P(A^C \cup B^C) \\ &\geq 1 - (P(E_1^C) + P(E_2^C) + P(E_3^C)). \end{aligned}$$

We complete the proof by showing that  $P(E_1^C)$ ,  $P(E_2^C)$ ,  $P(E_3^C)$  all tend to 0 as  $p \rightarrow \infty$ .

By Lemmas 3 and 4 of Borysov et al. (2014) for  $a_1 > 2\sigma_1^2$ , we have

$$\begin{aligned} P(E_1^C) &= P(\max d_W(C_1^{(1)}, C_2^{(1)}) > a_1 \cdot p) \\ &= P\left(\max \frac{2n_1n_2}{n_1+n_2} \left\| \overline{\mathbf{X}}_1^{(1)} - \overline{\mathbf{X}}_2^{(1)} \right\|^2 > a_1 \cdot p\right) \\ &\leq 3^n P\left(\left\| \left(\frac{2n_1n_2}{n_1+n_2}\right)^{1/2} (\overline{\mathbf{X}}_1^{(1)} - \overline{\mathbf{X}}_2^{(1)}) \right\|^2 > a_1 \cdot p\right) \\ &\leq e^{-c_1 p + n \log 3}, \end{aligned}$$

where  $c_1 = a_1/\sigma_1^2 - (1 + \log(a_1/\sigma_1^2))$ . Note that since  $c_1 > 0$  and  $n = o(p) + p^\alpha$  for some  $\alpha \in (0, 1)$ ,  $P(E_1^C) \rightarrow 0$  as  $p \rightarrow \infty$ . Similarly, for  $a_2 > 2\sigma_2^2$ , we have

$$P(E_2^C) \leq e^{-c_2 p + m \log 3},$$

where  $c_2 = a_2/\sigma_2^2 - (1 + \log(a_2/\sigma_2^2))$ , such that  $P(E_2^C) \rightarrow 0$  as  $p \rightarrow \infty$ . Finally, to bound  $P(E_3^C)$ , we make use of Lemmas 2 and 4 of Borysov et al. (2014):

$$\begin{aligned} P(E_3^C) &= P(\min d_W(C_0^{(1)}, C_0^{(2)}) < a_2 \cdot p) \\ &\leq \sum_{i=1}^n \sum_{j=1}^m P\left(\frac{2ij}{i+j} \left\| \overline{\mathbf{X}}_0^{(1)} - \overline{\mathbf{X}}_0^{(2)} \right\|^2 < a_2 \cdot p\right) \\ &\leq 2^{n+m} \max_{i \leq n, j \leq m} P\left(\frac{2ij}{i+j} \left\| \overline{\mathbf{X}}_0^{(1)} - \overline{\mathbf{X}}_0^{(2)} \right\|^2 < a_2 \cdot p\right). \end{aligned}$$

Suppose that  $i$  and  $j$  are fixed, and let  $\mu^2 = p^{-1}(\frac{2ij}{i+j})\|\boldsymbol{\mu}_1 - \boldsymbol{\mu}_2\|^2$ ,  $\mu_k = (\frac{2ij}{i+j})^{1/2}(\boldsymbol{\mu}_{1,k} - \boldsymbol{\mu}_{2,k})$ ,  $\sigma^2 = (\frac{2ij}{i+j})(\frac{i\sigma_2^2 + j\sigma_1^2}{ij})$ . Then, using the result of Lemma 2 of Borysov et al. (2014), for  $0 < a_2 < \sigma^2 + \mu^2$ , we have

$$P\left(\frac{2ij}{i+j}\left\|\overline{\mathbf{X}}_0^{(1)} - \overline{\mathbf{X}}_0^{(2)}\right\|^2 < a_2 \cdot p\right) \leq e^{-c_3 p},$$

where  $c_3 = (a_2 - \sigma^2 - \mu^2)^2 / (6\sigma^4 + 12\sigma^2\mu^2 + 2p^{-1}\sum_{k=1}^p \mu_k^4)$ .

Using the fourth moment bound of (2), and the fact that  $n = o(p) + p^\alpha$ ,  $m = o(p) + p^\beta$ , we have that  $P(E_3^C) \rightarrow 0$  as  $p \rightarrow \infty$ . Thus, for  $a_1 > 2\sigma_1^2$ ,  $P(E_1^C) \rightarrow 0$ , for  $a_1 > 2\sigma_2^2$ ,  $P(E_2^C) \rightarrow 0$ , and for  $a_2 < (\frac{2nm}{n+m})(\frac{\sigma_1^2}{n} + \frac{\sigma_2^2}{m} + \frac{\|\boldsymbol{\mu}_1 - \boldsymbol{\mu}_2\|^2}{p})$ ,  $P(E_3^C) \rightarrow 0$ . Combining the necessary inequalities on  $a_1, a_2$ , we obtain the stated condition:

$$\begin{aligned} 2\sigma_2^2 &< a_1 \leq a_2 \\ &< \frac{2nm}{n+m} \left( \frac{\sigma_1^2}{n} + \frac{\sigma_2^2}{m} + \frac{\|\boldsymbol{\mu}_1 - \boldsymbol{\mu}_2\|^2}{p} \right) \\ \frac{1}{n}(\sigma_2^2 - \sigma_1^2) &< \frac{\|\boldsymbol{\mu}_1 - \boldsymbol{\mu}_2\|^2}{p}. \end{aligned}$$

## Proof of Theorem 2

Let  $d_W(\cdot, \cdot)$  denote the Ward's linkage function. Further, let  $\mathbb{X}^{(1)}$  and  $\mathbb{X}^{(2)}$  denote the  $n$  and  $m$  observations from the first and second Gaussian components with distributions  $N(\boldsymbol{\mu}_1, \sigma_1^2 \mathbf{I}_p)$  and  $N(\boldsymbol{\mu}_2, \sigma_2^2 \mathbf{I}_p)$ . Assume that  $\boldsymbol{\mu}_1$ ,  $\boldsymbol{\mu}_2$ ,  $\sigma_1^2$  and  $\sigma_2^2$  are known. Then, the theoretical best fit Gaussian to the mixture distribution is equivalent (up to a mean shift and rotation) to

$N(\mathbf{0}, \widehat{\Sigma})$ , where

$$\begin{aligned}\widehat{\Sigma} &= \text{diag}\{\widehat{\lambda}_k\}_{k=1}^p \\ \widehat{\lambda}_1 &= \frac{nm}{n+m} \left( (n+m)^{-1} \|\boldsymbol{\mu}_1 - \boldsymbol{\mu}_2\|^2 + \frac{\sigma_1^2}{m} + \frac{\sigma_2^2}{n} \right) \\ \widehat{\lambda}_k &= \frac{nm}{n+m} \left( \frac{\sigma_1^2}{m} + \frac{\sigma_2^2}{n} \right), \quad \text{for } k \geq 2,\end{aligned}$$

where the  $\widehat{\lambda}_k$  are derived by the formula for the variance of a univariate mixture of Gaussians. Let  $\mathbb{X}^{(3)}$  denote a sample of  $n+m$  observations drawn from  $N(\mathbf{0}, \widehat{\Sigma})$ . Let  $\mathbb{C}^{(k)}$  denote the corresponding observation indices for  $k = 1, 2, 3$ . Additionally, let  $C_1^{(3)}$  and  $C_2^{(3)}$  denote disjoint subsets of  $\mathbb{C}^{(3)}$ , and let  $r_1 = |C_1^{(3)}|$  and  $r_2 = |C_2^{(3)}|$  denote the size of the subsets. Finally, let  $\mathbf{X}_1^{(3)}$  and  $\mathbf{X}_2^{(3)}$  denote the corresponding subsets of  $\mathbb{X}^{(3)}$  with means  $\overline{\mathbf{X}}_1^{(3)}$  and  $\overline{\mathbf{X}}_2^{(3)}$ .

Consider the event:  $D = \{\max d_W(C_1^{(3)}, C_2^{(3)}) < d_W(\mathbb{C}^{(1)}, \mathbb{C}^{(2)})\}$ , where the maximum is taken with respect to the possible values of  $C_1^{(3)}$  and  $C_2^{(3)}$ . By Theorem 1 we have that, asymptotically, Ward's linkage clustering achieves the correct partition of  $\mathbb{C}^{(1)}$  and  $\mathbb{C}^{(2)}$ . Therefore,  $D$  is precisely the event that a linkage value simulated from the null distribution is less than the observed linkage value. The proof is completed by showing  $P(D) \rightarrow 1$  as  $p \rightarrow \infty$ . That is, we wish to show that the empirical  $p$ -value tends to 0 as  $p \rightarrow \infty$ .

For some  $a > 0$ , define the following events:  $E_4 = \{\max d_W(C_1^{(3)}, C_2^{(3)}) < a \cdot p\}$ , and  $E_5 = \{d_W(\mathbb{C}^{(1)}, \mathbb{C}^{(2)}) > a \cdot p\}$ . Note that  $P(D)$  can be bounded below by:

$$\begin{aligned}P(D) &= 1 - P(D^C) \\ &\geq 1 - (P(E_4^C) + P(E_5^C)).\end{aligned}$$

Thus, it suffices to show the probabilities of  $E_4^C$ ,  $E_5^C$ , both tend to 0 as  $p \rightarrow \infty$ .

First, we state a generalization of Lemma 3 from Borysov et al. (2014) for Gaussian distributions with diagonal covariance.

**Lemma 1** Suppose  $n$  independent observations,  $\mathbb{X}$ , are drawn from the  $p$ -dimensional Gaussian distribution,  $N(\boldsymbol{\mu}, \boldsymbol{\Sigma})$ , where  $\boldsymbol{\Sigma}$  is a diagonal matrix with diagonal entries  $\{\lambda_k\}_{k=1}^p$ . Define scalars  $\mu^2 = p^{-1}\|\boldsymbol{\mu}\|^2$ ,  $\bar{\lambda} = p^{-1}\sum_{k=1}^p \lambda_k$ , and let  $a > \bar{\lambda} + \mu^2$ . Then, for any  $0 < i \leq n$ ,

$$P(\|X_i\|^2 > a \cdot p) \leq e^{-cp},$$

$$\text{where } c = \left[ a + \mu^2 - \sqrt{\bar{\lambda}^2 + 4\mu^2 a} + \bar{\lambda} \left( \frac{\bar{\lambda} + \sqrt{\bar{\lambda}^2 + 4\mu^2 a}}{2a} \right) \right] / \bar{\lambda}.$$

The proof of Lemma 1 is omitted as it follows exactly as that of Lemma 3 from Borysov et al. (2014). By Lemma 1 given above and Lemma 4 of Borysov et al. (2014), for  $a > 2\bar{\lambda}$ , where  $\bar{\lambda} = p^{-1}\sum_{k=1}^p \hat{\lambda}_k$ , we have

$$\begin{aligned} P(E_4^C) &= P(\max d_W(C_1^{(3)}, C_2^{(3)}) > a \cdot p) \\ &= P\left(\max \frac{2r_1 r_2}{r_1 + r_2} \left\| \bar{\mathbf{X}}_1^{(3)} - \bar{\mathbf{X}}_2^{(3)} \right\|^2 > a \cdot p\right) \\ &\leq 3^{n+m} P\left(\left\| \left( \frac{2r_1 r_2}{r_1 + r_2} \right)^{1/2} (\bar{\mathbf{X}}_1^{(3)} - \bar{\mathbf{X}}_2^{(3)}) \right\|^2 > a \cdot p\right) \\ &\leq e^{-c_4 p + (n+m) \log 3}, \end{aligned}$$

where  $c_4 = a/\bar{\lambda} - (1 + \log(a/\bar{\lambda}))$ . As for  $P(E_1^C)$  from the proof of Theorem 2, we have that as  $p \rightarrow \infty$ ,  $P(E_4^C) \rightarrow 0$  as  $p \rightarrow 0$ . Next, using an argument similar to the one presented above for  $P(E_3^C) \rightarrow 0$ , we show that  $P(E_5^C) \rightarrow 0$ . Let  $\mu^2 = p^{-1}(\frac{2nm}{n+m})\|\boldsymbol{\mu}_1 - \boldsymbol{\mu}_2\|^2$ ,  $\mu_k = (\frac{2nm}{n+m})^{1/2}(\boldsymbol{\mu}_{1,k} - \boldsymbol{\mu}_{2,k})$ ,  $\sigma^2 = (\frac{2nm}{n+m})(\frac{i\sigma_2^2 + j\sigma_1^2}{nm})$ . Then, by Lemmas 2 and 4 of Borysov et al. (2014), for  $0 < a < \sigma^2 + \mu^2$ , we have

$$\begin{aligned} P(E_4^C) &= P(d_W(\mathbb{C}^{(1)}, \mathbb{C}^{(2)}) < a \cdot p) \\ &= P\left(\frac{2nm}{n+m} \left\| \bar{\mathbf{X}}^{(1)} - \bar{\mathbf{X}}^{(2)} \right\|^2 < a \cdot p\right) \\ &\leq e^{-c_5 p}, \end{aligned}$$

where  $c_5 = (a - \sigma^2 - \mu^2)^2 / (6\sigma^4 + 12\sigma^2\mu^2 + 2p^{-1} \sum_{k=1}^p \mu_k^4)$ . As for  $P(E_3^C)$  from the proof of Theorem 2, we have  $P(E_3^C) \rightarrow 0$  as  $p \rightarrow \infty$ . Thus, for  $a > 2\bar{\lambda}$ ,  $P(E_4^C) \rightarrow 0$ , and for  $a < (\frac{2nm}{n+m})(\frac{\sigma_1^2}{n} + \frac{\sigma_2^2}{m} + \frac{\|\boldsymbol{\mu}_1 - \boldsymbol{\mu}_2\|^2}{p})$ ,  $P(E_5^C) \rightarrow 0$ . Combining the two inequalities on  $a$ , we obtain the stated condition:

$$\begin{aligned}
2p^{-1} \sum_{k=1}^p \hat{\lambda}_k &< a \\
&< \left( \frac{2nm}{n+m} \right) \left( \frac{\sigma_1^2}{n} + \frac{\sigma_2^2}{m} + \frac{\|\boldsymbol{\mu}_1 - \boldsymbol{\mu}_2\|^2}{p} \right) \\
\frac{\sigma_1^2}{m} + \frac{\sigma_2^2}{n} + (n+m)^{-1} \cdot \frac{\|\boldsymbol{\mu}_1 - \boldsymbol{\mu}_2\|^2}{p} &< \frac{\sigma_1^2}{n} + \frac{\sigma_2^2}{m} + \frac{\|\boldsymbol{\mu}_1 - \boldsymbol{\mu}_2\|^2}{p} \\
\frac{(m^2 - n^2)(\sigma_2^2 - \sigma_1^2)}{nm(n+m-1)} &< \frac{\|\boldsymbol{\mu}_1 - \boldsymbol{\mu}_2\|^2}{p}.
\end{aligned}$$

## Web Appendix B: Additional Simulation Discussion and Results

In Maitra et al. (2012), the BootClust approach was only tested in settings with dimension up to 80, suggesting that the method may not be suitable for inference in settings of substantially higher dimension, e.g.  $p = 1000$ . Therefore, to keep the total computational time of the simulations manageable, for each setting a single replication of the BootClust approach was first run with a maximum runtime of two hours. If more than two hours was needed for the approach to finish, the method was assumed to be incapable of performing the analysis. Most simulations with  $p = 1000$  required longer than the pre-specified two hours to complete. In all other  $p = 1000$  settings, BootClust consistently returned the maximum number of clusters considered, 10, regardless of the underlying dataset. Representative results for applying the BootClust approach to high-dimensional settings with  $K = 1, 2, 3, 4$  are shown in Table S1. Since these results illustrate poor behavior of the method when  $p = 1000$ , performance using BootClust is not reported for these settings.

We next provide a brief review of the fundamental differences between `pvclust` and our proposed SHC method. Similar to SHC, `pvclust` also tests at nodes along the dendrogram. However, no test is performed at the root node, and the corresponding hypotheses tested at each node is given by:

$H_0$  : the cluster does not exist

$H_1$  : the cluster exists.

The difference between the two approaches can be understood by examining the dendrogram presented in Figure 2B of the main text. Using SHC, significant evidence of the three clusters is obtained if the null hypothesis is rejected at the top two nodes of the dendrogram. In contrast, to identify the three clusters using `pvclust`, the null hypothesis must be rejected at the three nodes directly above each cluster, denoted by their respective cluster symbol.

Table S1:  $K = 1, 2, 3, 4$  simulation results for the BootClust (BC) method in select high-dimensional settings ( $p = 1000$ ). Each setting was replicated 5 times. For each setting, the number of replications detecting the correct number of clusters ( $|\hat{K} = K|$ ), the mean number of significant clusters (mean  $\hat{K}$ ), and median computing time are reported. All simulations were allowed to run until completion. ( $K$ : number of clusters,  $N$ : sample size,  $p$ : dimension,  $\delta$ : separating signal between clusters, shape: orientation of cluster centroids,  $F$ : cluster distribution.)

| parameters |     |      |          |             |       | $ \hat{K} = K $ (mean $\hat{K}$ ) | median time (sec.) |
|------------|-----|------|----------|-------------|-------|-----------------------------------|--------------------|
| $K$        | $N$ | $p$  | $\delta$ | shape       | $F$   | BC                                | BC                 |
| 1          | 50  | 1000 | 0        | –           | Gaus. | 0 (10)                            | 1482.73            |
| 1          | 100 | 1000 | 0        | –           | Gaus. | 0 (10)                            | 1803.63            |
| 1          | 200 | 1000 | 0        | –           | Gaus. | 0 (10)                            | 3878.31            |
| 1          | 50  | 1000 | 0        | –           | $t_3$ | 0 (10)                            | 11432.72           |
| 1          | 100 | 1000 | 0        | –           | $t_3$ | 0 (10)                            | 11241.9            |
| 1          | 200 | 1000 | 0        | –           | $t_3$ | 0 (10)                            | 13108.73           |
| 2          | 100 | 1000 | 6        | Line        | Gaus. | 0 (10)                            | 2752.52            |
| 2          | 200 | 1000 | 6        | Line        | Gaus. | 0 (10)                            | 3728.86            |
| 2          | 100 | 1000 | 6        | Line        | $t_3$ | 0 (10)                            | 15115.67           |
| 2          | 200 | 1000 | 6        | Line        | $t_3$ | 0 (10)                            | 16875.53           |
| 3          | 150 | 1000 | 12       | Triangle    | Gaus. | 0 (10)                            | 3369.85            |
| 3          | 300 | 1000 | 12       | Triangle    | Gaus. | 0 (10)                            | 4818.35            |
| 3          | 150 | 1000 | 12       | Triangle    | $t_3$ | 0 (10)                            | 3535.31            |
| 3          | 300 | 1000 | 12       | Triangle    | $t_3$ | 0 (10)                            | 14395.84           |
| 4          | 200 | 1000 | 12       | Tetrahedron | Gaus. | 0 (10)                            | 2192.96            |
| 4          | 400 | 1000 | 12       | Tetrahedron | Gaus. | 0 (10)                            | 5897.81            |
| 4          | 200 | 1000 | 12       | Tetrahedron | $t_3$ | 0 (10)                            | 12890.73           |
| 4          | 400 | 1000 | 12       | Tetrahedron | $t_3$ | 0 (10)                            | 4585.91            |



Table S2:  $K = 1$  simulation results for low-dimensional settings ( $p = 10$ ). Each setting was replicated 100 times. For each setting, the number of false positives ( $|p\text{-value} < 0.05|$ ) and median computing time are reported for `pvclust` AU  $p$ -values (`pvAU`), `SHCL`, `SHC2`, and `BootClust` (BC). Results for `pvclust` BP  $p$ -values are omitted since no significant clusters were identified across any settings. ( $N$ : sample size,  $p$ : dimension,  $v$ : scaling factor of first dimension to mimic low-dimensional noise,  $F$ : cluster distribution.)

| parameters |      |       | $ p\text{-value} < 0.05 $ |                  |                  |    | median time (sec.) |                  |                  |      |
|------------|------|-------|---------------------------|------------------|------------------|----|--------------------|------------------|------------------|------|
| $N$        | $v$  | $F$   | pvAU                      | SHC <sub>L</sub> | SHC <sub>2</sub> | BC | pv                 | SHC <sub>L</sub> | SHC <sub>2</sub> | BC   |
| 50         | 1    | Gaus. | 1                         | 0                | 0                | 0  | 9.81               | 0.09             | 0.15             | 0.43 |
| 50         | 10   | Gaus. | 8                         | 0                | 1                | 0  | 10.33              | 0.08             | 0.17             | 0.4  |
| 50         | 50   | Gaus. | 10                        | 0                | 1                | 0  | 8.45               | 0.06             | 0.12             | 0.29 |
| 50         | 100  | Gaus. | 19                        | 0                | 3                | 0  | 8.52               | 0.06             | 0.12             | 0.29 |
| 50         | 1000 | Gaus. | 49                        | 0                | 1                | 0  | 8.34               | 0.06             | 0.12             | 0.28 |
| 50         | 1    | $t_6$ | 1                         | 0                | 0                | 0  | 8.6                | 0.07             | 0.12             | 0.29 |
| 50         | 10   | $t_6$ | 15                        | 0                | 0                | 0  | 8.57               | 0.06             | 0.12             | 0.29 |
| 50         | 50   | $t_6$ | 22                        | 0                | 2                | 0  | 8.62               | 0.06             | 0.12             | 0.29 |
| 50         | 100  | $t_6$ | 12                        | 0                | 0                | 0  | 8.65               | 0.06             | 0.12             | 0.3  |
| 50         | 1000 | $t_6$ | 51                        | 0                | 0                | 0  | 8.49               | 0.06             | 0.12             | 0.28 |
| 50         | 1    | $t_3$ | 16                        | 3                | 10               | 12 | 8.59               | 0.06             | 0.12             | 0.3  |
| 50         | 10   | $t_3$ | 24                        | 0                | 1                | 4  | 8.72               | 0.06             | 0.12             | 0.29 |
| 50         | 50   | $t_3$ | 32                        | 2                | 4                | 4  | 8.55               | 0.06             | 0.12             | 0.29 |
| 50         | 100  | $t_3$ | 40                        | 0                | 2                | 0  | 8.54               | 0.06             | 0.12             | 0.29 |
| 50         | 1000 | $t_3$ | 53                        | 0                | 1                | 0  | 8.53               | 0.06             | 0.12             | 0.28 |
| 100        | 1    | Gaus. | 0                         | 0                | 0                | 0  | 22.38              | 0.16             | 0.23             | 0.78 |
| 100        | 10   | Gaus. | 3                         | 0                | 1                | 0  | 23.83              | 0.22             | 0.31             | 1.04 |
| 100        | 50   | Gaus. | 5                         | 0                | 1                | 0  | 21.95              | 0.17             | 0.26             | 0.72 |
| 100        | 100  | Gaus. | 10                        | 0                | 4                | 0  | 25.29              | 0.22             | 0.31             | 1.04 |
| 100        | 1000 | Gaus. | 21                        | 0                | 3                | 0  | 22.6               | 0.16             | 0.25             | 0.7  |
| 100        | 1    | $t_6$ | 1                         | 0                | 0                | 0  | 22.44              | 0.16             | 0.24             | 0.79 |
| 100        | 10   | $t_6$ | 0                         | 0                | 0                | 0  | 22.83              | 0.16             | 0.24             | 0.78 |
| 100        | 50   | $t_6$ | 10                        | 0                | 0                | 0  | 22.38              | 0.16             | 0.23             | 0.77 |
| 100        | 100  | $t_6$ | 12                        | 0                | 0                | 0  | 22.48              | 0.16             | 0.23             | 0.76 |
| 100        | 1000 | $t_6$ | 20                        | 0                | 0                | 0  | 22.55              | 0.15             | 0.23             | 0.74 |
| 100        | 1    | $t_3$ | 18                        | 16               | 20               | 28 | 22.02              | 0.22             | 0.31             | 1.09 |
| 100        | 10   | $t_3$ | 20                        | 2                | 4                | 4  | 22.6               | 0.17             | 0.31             | 0.86 |
| 100        | 50   | $t_3$ | 23                        | 1                | 2                | 3  | 21.71              | 0.21             | 0.29             | 1.01 |
| 100        | 100  | $t_3$ | 22                        | 0                | 0                | 0  | 22.96              | 0.17             | 0.26             | 0.72 |
| 100        | 1000 | $t_3$ | 32                        | 1                | 3                | 4  | 22.57              | 0.16             | 0.23             | 0.75 |
| 200        | 1    | Gaus. | 0                         | 0                | 0                | 0  | 68.81              | 0.51             | 0.63             | 2.79 |
| 200        | 10   | Gaus. | 0                         | 0                | 1                | 0  | 69.11              | 0.51             | 0.62             | 2.77 |
| 200        | 50   | Gaus. | 5                         | 0                | 1                | 0  | 68.18              | 0.5              | 0.61             | 2.73 |
| 200        | 100  | Gaus. | 6                         | 0                | 3                | 0  | 68.6               | 0.5              | 0.61             | 2.7  |
| 200        | 1000 | Gaus. | 8                         | 0                | 4                | 0  | 68.38              | 0.49             | 0.6              | 2.64 |
| 200        | 1    | $t_6$ | 0                         | 0                | 0                | 1  | 81.41              | 0.79             | 0.92             | 4.54 |
| 200        | 10   | $t_6$ | 2                         | 0                | 0                | 0  | 62.89              | 0.49             | 0.62             | 2.43 |
| 200        | 50   | $t_6$ | 3                         | 0                | 0                | 0  | 61.84              | 0.61             | 0.74             | 3.25 |
| 200        | 100  | $t_6$ | 2                         | 0                | 0                | 0  | 62.84              | 0.48             | 0.62             | 2.38 |
| 200        | 1000 | $t_6$ | 5                         | 0                | 0                | 0  | 61.53              | 0.61             | 0.71             | 3.19 |
| 200        | 1    | $t_3$ | 7                         | 9                | 11               | 32 | 68.72              | 0.51             | 0.62             | 2.84 |
| 200        | 10   | $t_3$ | 14                        | 2                | 4                | 8  | 68.94              | 0.51             | 0.62             | 2.8  |
| 200        | 50   | $t_3$ | 12                        | 2                | 2                | 3  | 68.3               | 0.5              | 0.61             | 2.76 |
| 200        | 100  | $t_3$ | 14                        | 2                | 2                | 2  | 68.72              | 0.5              | 0.62             | 2.74 |
| 200        | 1000 | $t_3$ | 23                        | 0                | 0                | 0  | 62.52              | 0.62             | 0.85             | 3.17 |

Table S3:  $K = 1$  simulation results for moderate-dimensional settings ( $p = 100$ ). Each setting was replicated 100 times. For each setting, the number of false positives ( $|p\text{-value} < 0.05|$ ) and median computing time are reported for `pvc1ust` AU  $p$ -values (pvAU), SHC<sub>L</sub>, SHC<sub>2</sub>, and BootClust (BC). Results for `pvc1ust` BP  $p$ -values are omitted since no significant clusters were identified across any settings. ( $N$ : sample size,  $p$ : dimension,  $v$ : scaling factor of first dimension to mimic low-dimensional noise,  $F$ : cluster distribution.)

| parameters |      |       | $ p\text{-value} < 0.05 $ |                  |                  |     | median time (sec.) |                  |                  |       |
|------------|------|-------|---------------------------|------------------|------------------|-----|--------------------|------------------|------------------|-------|
| $N$        | $v$  | $F$   | pvAU                      | SHC <sub>L</sub> | SHC <sub>2</sub> | BC  | pv                 | SHC <sub>L</sub> | SHC <sub>2</sub> | BC    |
| 50         | 1    | Gaus. | 0                         | 0                | 0                | 100 | 10.06              | 0.39             | 0.49             | 4.89  |
| 50         | 10   | Gaus. | 2                         | 0                | 0                | 100 | 9.99               | 0.37             | 0.48             | 4.92  |
| 50         | 50   | Gaus. | 5                         | 0                | 0                | 100 | 14.47              | 0.38             | 0.49             | 6.07  |
| 50         | 100  | Gaus. | 3                         | 0                | 0                | 100 | 10.25              | 0.38             | 0.48             | 5.02  |
| 50         | 1000 | Gaus. | 22                        | 0                | 2                | 100 | 10.4               | 0.32             | 0.48             | 5.41  |
| 50         | 1    | $t_6$ | 2                         | 0                | 0                | 100 | 11.7               | 0.38             | 0.48             | 5.62  |
| 50         | 10   | $t_6$ | 5                         | 0                | 0                | 100 | 14.43              | 0.34             | 0.44             | 6.88  |
| 50         | 50   | $t_6$ | 8                         | 0                | 0                | 100 | 10.35              | 0.36             | 0.48             | 5.63  |
| 50         | 100  | $t_6$ | 5                         | 0                | 0                | 100 | 10.48              | 0.27             | 0.36             | 5.62  |
| 50         | 1000 | $t_6$ | 24                        | 0                | 1                | 100 | 10.44              | 0.34             | 0.45             | 5.48  |
| 50         | 1    | $t_3$ | 16                        | 15               | 20               | 100 | 10.18              | 0.38             | 0.49             | 7.79  |
| 50         | 10   | $t_3$ | 15                        | 13               | 22               | 100 | 12.45              | 0.34             | 0.44             | 15.24 |
| 50         | 50   | $t_3$ | 25                        | 4                | 7                | 100 | 18.01              | 0.38             | 0.48             | 16.42 |
| 50         | 100  | $t_3$ | 19                        | 1                | 3                | 100 | 10.5               | 0.38             | 0.49             | 6.81  |
| 50         | 1000 | $t_3$ | 42                        | 0                | 1                | 100 | 10.31              | 0.38             | 0.5              | 5.97  |
| 100        | 1    | Gaus. | 0                         | 0                | 0                | 46  | 28.59              | 1.2              | 1.38             | 7.35  |
| 100        | 10   | Gaus. | 0                         | 0                | 0                | 51  | 47.24              | 1.2              | 1.39             | 9.42  |
| 100        | 50   | Gaus. | 1                         | 0                | 0                | 47  | 30.28              | 1.21             | 1.38             | 7.02  |
| 100        | 100  | Gaus. | 3                         | 0                | 2                | 44  | 34.15              | 1.06             | 1.24             | 8.3   |
| 100        | 1000 | Gaus. | 10                        | 0                | 2                | 41  | 27.41              | 1.2              | 1.39             | 5.07  |
| 100        | 1    | $t_6$ | 1                         | 0                | 0                | 57  | 34.01              | 1.21             | 1.4              | 8.06  |
| 100        | 10   | $t_6$ | 1                         | 0                | 0                | 50  | 32.59              | 1.2              | 1.4              | 7.95  |
| 100        | 50   | $t_6$ | 1                         | 0                | 0                | 48  | 36.85              | 1.2              | 1.39             | 8.98  |
| 100        | 100  | $t_6$ | 3                         | 0                | 0                | 48  | 34.52              | 1.2              | 1.39             | 8.25  |
| 100        | 1000 | $t_6$ | 5                         | 0                | 0                | 51  | 31.59              | 1.19             | 1.38             | 7.83  |
| 100        | 1    | $t_3$ | 14                        | 40               | 45               | 72  | 36.6               | 1.21             | 1.45             | 18.9  |
| 100        | 10   | $t_3$ | 10                        | 20               | 21               | 59  | 32.45              | 1.2              | 1.39             | 14.09 |
| 100        | 50   | $t_3$ | 19                        | 5                | 9                | 61  | 34.59              | 1.2              | 1.4              | 12.18 |
| 100        | 100  | $t_3$ | 16                        | 0                | 2                | 51  | 36.05              | 1.2              | 1.39             | 10.15 |
| 100        | 1000 | $t_3$ | 18                        | 1                | 1                | 45  | 33.66              | 1.2              | 1.38             | 8.25  |
| 200        | 1    | Gaus. | 0                         | 0                | 0                | 0   | 97.76              | 4.41             | 4.78             | 16.28 |
| 200        | 10   | Gaus. | 0                         | 6                | 17               | 1   | 101.68             | 4.48             | 4.88             | 16.82 |
| 200        | 50   | Gaus. | 0                         | 0                | 2                | 0   | 110.09             | 4.45             | 4.82             | 18.03 |
| 200        | 100  | Gaus. | 2                         | 0                | 1                | 0   | 94.17              | 3.59             | 4.31             | 13.5  |
| 200        | 1000 | Gaus. | 5                         | 0                | 2                | 0   | 115.4              | 4.45             | 4.84             | 20.57 |
| 200        | 1    | $t_6$ | 0                         | 0                | 0                | 0   | 107.66             | 4.57             | 4.97             | 19.4  |
| 200        | 10   | $t_6$ | 0                         | 0                | 0                | 0   | 112.94             | 4.15             | 4.51             | 19.8  |
| 200        | 50   | $t_6$ | 0                         | 0                | 0                | 0   | 115.66             | 4.55             | 4.94             | 21.21 |
| 200        | 100  | $t_6$ | 1                         | 0                | 0                | 0   | 95.23              | 4.51             | 4.87             | 18.28 |
| 200        | 1000 | $t_6$ | 5                         | 0                | 0                | 0   | 93.76              | 4.02             | 4.41             | 18.72 |
| 200        | 1    | $t_3$ | 23                        | 65               | 65               | 74  | 104.59             | 9                | 9.74             | 29.73 |
| 200        | 10   | $t_3$ | 9                         | 27               | 27               | 56  | 120.94             | 4.59             | 4.98             | 25.83 |
| 200        | 50   | $t_3$ | 6                         | 8                | 8                | 13  | 116.16             | 4.61             | 5.02             | 20.46 |
| 200        | 100  | $t_3$ | 13                        | 4                | 4                | 2   | 118.74             | 4.53             | 4.9              | 20.42 |
| 200        | 1000 | $t_3$ | 16                        | 1                | 2                | 1   | 113.63             | 4.44             | 4.81             | 20.01 |

Table S4:  $K = 1$  simulation results for high-dimensional settings ( $p = 1000$ ). Each setting was replicated 100 times. For each setting, the number of false positives ( $|p\text{-value} < 0.05|$ ) and median computing time are reported for `pvclust` AU  $p$ -values (`pvAU`), `SHCL`, `SHC2`, and `BootClust` (BC). Results for `pvclust` BP  $p$ -values are omitted since no significant clusters were identified across any settings. `BootClust` results are not reported for the high-dimensional setting (-). ( $N$ : sample size,  $p$ : dimension,  $v$ : scaling factor of first dimension to mimic low-dimensional noise,  $F$ : cluster distribution.)

| parameters |      |       | $ p\text{-value} < 0.05 $ |                              |                              |    | median time (sec.) |                              |                              |    |
|------------|------|-------|---------------------------|------------------------------|------------------------------|----|--------------------|------------------------------|------------------------------|----|
| $N$        | $v$  | $F$   | <code>pvAU</code>         | <code>SHC<sub>L</sub></code> | <code>SHC<sub>2</sub></code> | BC | <code>pv</code>    | <code>SHC<sub>L</sub></code> | <code>SHC<sub>2</sub></code> | BC |
| 50         | 1    | Gaus. | 0                         | 0                            | 0                            | -  | 34.98              | 3.41                         | 4.26                         | -  |
| 50         | 10   | Gaus. | 0                         | 0                            | 0                            | -  | 31.79              | 3.38                         | 4.09                         | -  |
| 50         | 50   | Gaus. | 0                         | 0                            | 1                            | -  | 36                 | 3.43                         | 4.32                         | -  |
| 50         | 100  | Gaus. | 1                         | 0                            | 0                            | -  | 30.66              | 3.42                         | 4.3                          | -  |
| 50         | 1000 | Gaus. | 12                        | 0                            | 1                            | -  | 35.8               | 3.06                         | 3.75                         | -  |
| 50         | 1    | $t_6$ | 3                         | 0                            | 0                            | -  | 24.63              | 3.43                         | 4.27                         | -  |
| 50         | 10   | $t_6$ | 0                         | 1                            | 1                            | -  | 34.53              | 2.41                         | 3.07                         | -  |
| 50         | 50   | $t_6$ | 5                         | 0                            | 0                            | -  | 31.82              | 3.32                         | 4.14                         | -  |
| 50         | 100  | $t_6$ | 9                         | 0                            | 0                            | -  | 35.42              | 3.32                         | 4.14                         | -  |
| 50         | 1000 | $t_6$ | 12                        | 0                            | 0                            | -  | 28.03              | 3.47                         | 4.33                         | -  |
| 50         | 1    | $t_3$ | 20                        | 9                            | 14                           | -  | 32.13              | 3.39                         | 4.28                         | -  |
| 50         | 10   | $t_3$ | 23                        | 14                           | 17                           | -  | 27.83              | 3.41                         | 4.29                         | -  |
| 50         | 50   | $t_3$ | 14                        | 8                            | 9                            | -  | 39.5               | 3.35                         | 4.15                         | -  |
| 50         | 100  | $t_3$ | 14                        | 7                            | 9                            | -  | 32.19              | 3.03                         | 3.9                          | -  |
| 50         | 1000 | $t_3$ | 28                        | 1                            | 3                            | -  | 33.44              | 3.43                         | 4.27                         | -  |
| 100        | 1    | Gaus. | 0                         | 0                            | 0                            | -  | 96.79              | 12.03                        | 13.65                        | -  |
| 100        | 10   | Gaus. | 0                         | 0                            | 0                            | -  | 130.63             | 11.96                        | 13.76                        | -  |
| 100        | 50   | Gaus. | 0                         | 0                            | 0                            | -  | 81.52              | 11.74                        | 13.58                        | -  |
| 100        | 100  | Gaus. | 0                         | 0                            | 0                            | -  | 94.58              | 12.16                        | 13.74                        | -  |
| 100        | 1000 | Gaus. | 1                         | 0                            | 0                            | -  | 109.47             | 11.46                        | 13                           | -  |
| 100        | 1    | $t_6$ | 1                         | 0                            | 0                            | -  | 115.5              | 11.09                        | 13.02                        | -  |
| 100        | 10   | $t_6$ | 0                         | 0                            | 0                            | -  | 78.09              | 12.27                        | 13.95                        | -  |
| 100        | 50   | $t_6$ | 3                         | 0                            | 0                            | -  | 129.13             | 11.1                         | 13.04                        | -  |
| 100        | 100  | $t_6$ | 1                         | 0                            | 0                            | -  | 99.47              | 12.09                        | 13.78                        | -  |
| 100        | 1000 | $t_6$ | 5                         | 0                            | 0                            | -  | 97.05              | 10.7                         | 12.52                        | -  |
| 100        | 1    | $t_3$ | 22                        | 45                           | 48                           | -  | 101.62             | 12.43                        | 14.58                        | -  |
| 100        | 10   | $t_3$ | 22                        | 48                           | 50                           | -  | 102.03             | 12.6                         | 18.78                        | -  |
| 100        | 50   | $t_3$ | 4                         | 18                           | 19                           | -  | 128.57             | 11.94                        | 13.52                        | -  |
| 100        | 100  | $t_3$ | 11                        | 9                            | 9                            | -  | 117.9              | 12.28                        | 14.23                        | -  |
| 100        | 1000 | $t_3$ | 18                        | 3                            | 3                            | -  | 130.98             | 11.62                        | 13.27                        | -  |
| 200        | 1    | Gaus. | 0                         | 0                            | 0                            | -  | 324.1              | 44.96                        | 48.2                         | -  |
| 200        | 10   | Gaus. | 0                         | 0                            | 1                            | -  | 457.49             | 43.65                        | 46.58                        | -  |
| 200        | 50   | Gaus. | 0                         | 0                            | 0                            | -  | 410.82             | 43.86                        | 46.62                        | -  |
| 200        | 100  | Gaus. | 0                         | 0                            | 0                            | -  | 467.12             | 45.87                        | 49.1                         | -  |
| 200        | 1000 | Gaus. | 1                         | 0                            | 0                            | -  | 386.62             | 46.16                        | 49.71                        | -  |
| 200        | 1    | $t_6$ | 3                         | 0                            | 0                            | -  | 286.82             | 46.01                        | 49.27                        | -  |
| 200        | 10   | $t_6$ | 1                         | 0                            | 0                            | -  | 286.01             | 45.79                        | 49.16                        | -  |
| 200        | 50   | $t_6$ | 0                         | 0                            | 0                            | -  | 287                | 42.55                        | 45.6                         | -  |
| 200        | 100  | $t_6$ | 0                         | 0                            | 0                            | -  | 289.29             | 46.07                        | 49.22                        | -  |
| 200        | 1000 | $t_6$ | 3                         | 0                            | 0                            | -  | 285.66             | 45.7                         | 48.76                        | -  |
| 200        | 1    | $t_3$ | 28                        | 88                           | 88                           | -  | 459.98             | 91.14                        | 97.77                        | -  |
| 200        | 10   | $t_3$ | 18                        | 76                           | 76                           | -  | 298.76             | 87.14                        | 93.34                        | -  |
| 200        | 50   | $t_3$ | 14                        | 20                           | 19                           | -  | 288.86             | 46.27                        | 50.1                         | -  |
| 200        | 100  | $t_3$ | 16                        | 10                           | 10                           | -  | 287.57             | 41.91                        | 46.11                        | -  |
| 200        | 1000 | $t_3$ | 9                         | 1                            | 1                            | -  | 288.84             | 39.81                        | 42.68                        | -  |

**Table S5:**  $K = 2$  simulation results for low-dimensional settings ( $p = 10$ ) with equal cluster sizes ( $\pi_1, \pi_2 = 1/2, 1/2$ ). Each setting was replicated 100 times. For each setting, the number of replications detecting the correct number of clusters ( $|\hat{K} = 2|$ ), the mean number of significant clusters (mean  $\hat{K}$ ), median computing time, and mean adjusted Rand Index (ARI) are reported for pvclust AU  $p$ -values (pvAU), SHC<sub>L</sub>, SHC<sub>2</sub>, and BootClust (BC). Results for pvclust BP  $p$ -values are omitted since no significant clusters were identified across any settings. ( $N$ : sample size,  $\delta$ : separating signal between clusters,  $F$ : cluster distribution.)

| parameters |          | $ \hat{K} = 2 $ (mean $\hat{K}$ ) |            |                  |                  |           |        |                  |                  |      |      | median time (sec.) |                  |      |      | mean ARI         |                  |      |  |
|------------|----------|-----------------------------------|------------|------------------|------------------|-----------|--------|------------------|------------------|------|------|--------------------|------------------|------|------|------------------|------------------|------|--|
| $N$        | $\delta$ | $F$                               | pvAU       | SHC <sub>L</sub> | SHC <sub>2</sub> | BC        | pv     | SHC <sub>L</sub> | SHC <sub>2</sub> | BC   | pvAU | SHC <sub>L</sub>   | SHC <sub>2</sub> | BC   | pvAU | SHC <sub>L</sub> | SHC <sub>2</sub> | BC   |  |
| 100        | 2        | Gaus.                             | 0 (19.02)  | 0 (1)            | 0 (1)            | 0 (1)     | 22.37  | 0.16             | 0.23             | 0.78 | 0.01 | 0                  | 0                | 0    | 0.01 | 0                | 0                | 0    |  |
| 100        | 4        | Gaus.                             | 3 (18.92)  | 73 (1.73)        | 96 (1.96)        | 84 (1.84) | 22.44  | 0.28             | 0.42             | 0.77 | 0.05 | 0.62               | 0.79             | 0.71 | 0.05 | 0.62             | 0.79             | 0.71 |  |
| 100        | 6        | Gaus.                             | 32 (13.56) | 100 (2)          | 100 (2)          | 100 (2)   | 22.23  | 0.33             | 0.46             | 0.96 | 0.34 | 0.98               | 0.98             | 0.98 | 0.34 | 0.98             | 0.98             | 0.98 |  |
| 100        | 8        | Gaus.                             | 78 (5.66)  | 100 (2)          | 100 (2)          | 100 (2)   | 22.14  | 0.29             | 0.46             | 0.75 | 0.79 | 1                  | 1                | 1    | 0.79 | 1                | 1                | 1    |  |
| 100        | 10       | Gaus.                             | 92 (3.41)  | 100 (2)          | 100 (2)          | 100 (2)   | 26.54  | 0.35             | 0.48             | 1.04 | 0.92 | 1                  | 1                | 1    | 0.92 | 1                | 1                | 1    |  |
| 100        | 2        | $t_6$                             | 0 (18.54)  | 0 (1)            | 0 (1)            | 0 (1)     | 25.27  | 0.22             | 0.31             | 1.09 | 0.01 | 0                  | 0                | 0    | 0.01 | 0                | 0                | 0    |  |
| 100        | 4        | $t_6$                             | 0 (19)     | 31 (1.31)        | 65 (1.65)        | 55 (1.55) | 22.77  | 0.23             | 0.42             | 1.04 | 0.02 | 0.24               | 0.48             | 0.41 | 0.02 | 0.24             | 0.48             | 0.41 |  |
| 100        | 6        | $t_6$                             | 4 (18.22)  | 100 (2)          | 100 (2)          | 100 (2)   | 22.21  | 0.29             | 0.46             | 0.72 | 0.08 | 0.93               | 0.93             | 0.93 | 0.08 | 0.93             | 0.93             | 0.93 |  |
| 100        | 8        | $t_6$                             | 44 (11.33) | 100 (2)          | 100 (2)          | 100 (2)   | 24.59  | 0.34             | 0.52             | 1    | 0.45 | 0.98               | 0.98             | 0.98 | 0.45 | 0.98             | 0.98             | 0.98 |  |
| 100        | 10       | $t_6$                             | 71 (6.7)   | 100 (2)          | 100 (2)          | 100 (2)   | 24.61  | 0.38             | 0.53             | 1.09 | 0.72 | 0.99               | 0.99             | 0.99 | 0.72 | 0.99             | 0.99             | 0.99 |  |
| 100        | 2        | $t_3$                             | 0 (16.19)  | 8 (1.1)          | 10 (1.14)        | 0 (3.07)  | 22.62  | 0.16             | 0.23             | 0.79 | 0.01 | 0                  | 0                | 0    | 0.01 | 0                | 0                | 0    |  |
| 100        | 4        | $t_3$                             | 0 (18.18)  | 6 (1.06)         | 11 (1.13)        | 7 (4.49)  | 28.09  | 0.22             | 0.31             | 1.19 | 0.02 | 0                  | 0.03             | 0.14 | 0.02 | 0                | 0.03             | 0.14 |  |
| 100        | 6        | $t_3$                             | 4 (16.77)  | 65 (1.77)        | 74 (2)           | 73 (3.44) | 29.46  | 0.41             | 0.64             | 1.32 | 0.1  | 0.6                | 0.72             | 0.67 | 0.1  | 0.6              | 0.72             | 0.67 |  |
| 100        | 8        | $t_3$                             | 11 (15.12) | 92 (2.06)        | 82 (2.17)        | 83 (3.27) | 27.15  | 0.39             | 0.54             | 1.15 | 0.2  | 0.91               | 0.91             | 0.83 | 0.2  | 0.91             | 0.91             | 0.83 |  |
| 100        | 10       | $t_3$                             | 24 (12.87) | 94 (2.04)        | 83 (2.18)        | 81 (3.52) | 21.39  | 0.32             | 0.47             | 1.01 | 0.33 | 0.95               | 0.96             | 0.86 | 0.33 | 0.95             | 0.96             | 0.86 |  |
| 200        | 2        | Gaus.                             | 0 (43.44)  | 0 (1)            | 2 (1.02)         | 1 (1.01)  | 64.16  | 0.65             | 0.79             | 3.55 | 0.01 | 0                  | 0.01             | 0    | 0.01 | 0                | 0.01             | 0    |  |
| 200        | 4        | Gaus.                             | 0 (43.51)  | 98 (1.98)        | 99 (1.99)        | 98 (1.98) | 65.9   | 1.17             | 1.39             | 3.66 | 0.01 | 0.79               | 0.8              | 0.79 | 0.01 | 0.79             | 0.8              | 0.79 |  |
| 200        | 6        | Gaus.                             | 27 (32.1)  | 100 (2)          | 100 (2)          | 100 (2)   | 103.41 | 1.42             | 1.69             | 4.8  | 0.28 | 0.98               | 0.98             | 0.98 | 0.28 | 0.98             | 0.98             | 0.98 |  |
| 200        | 8        | Gaus.                             | 78 (11.07) | 100 (2)          | 100 (2)          | 100 (2)   | 85.1   | 1.21             | 1.42             | 4.08 | 0.78 | 1                  | 1                | 1    | 0.78 | 1                | 1                | 1    |  |
| 200        | 10       | Gaus.                             | 79 (10.15) | 100 (2)          | 100 (2)          | 100 (2)   | 70.01  | 1.2              | 1.4              | 3.81 | 0.79 | 1                  | 1                | 1    | 0.79 | 1                | 1                | 1    |  |
| 200        | 2        | $t_6$                             | 0 (41.3)   | 0 (1)            | 0 (1)            | 0 (1)     | 100.51 | 0.9              | 1.06             | 4.84 | 0    | 0                  | 0                | 0    | 0    | 0                | 0                | 0    |  |
| 200        | 4        | $t_6$                             | 1 (40.82)  | 86 (1.86)        | 97 (1.97)        | 93 (1.96) | 69.1   | 1.1              | 1.39             | 3.76 | 0.02 | 0.61               | 0.68             | 0.66 | 0.02 | 0.61             | 0.68             | 0.66 |  |
| 200        | 6        | $t_6$                             | 5 (40.09)  | 100 (2)          | 100 (2)          | 100 (2)   | 64.19  | 1.1              | 1.24             | 3.53 | 0.06 | 0.92               | 0.92             | 0.92 | 0.06 | 0.92             | 0.92             | 0.92 |  |
| 200        | 8        | $t_6$                             | 15 (35.69) | 100 (2)          | 100 (2)          | 100 (2)   | 62.36  | 0.98             | 1.19             | 3.25 | 0.16 | 0.98               | 0.98             | 0.98 | 0.16 | 0.98             | 0.98             | 0.98 |  |
| 200        | 10       | $t_6$                             | 61 (17.18) | 100 (2)          | 100 (2)          | 99 (2.08) | 61.06  | 1.02             | 1.18             | 3.23 | 0.62 | 0.99               | 0.99             | 0.98 | 0.62 | 0.99             | 0.99             | 0.98 |  |
| 200        | 2        | $t_3$                             | 2 (34.7)   | 12 (1.12)        | 16 (1.16)        | 0 (3.97)  | 62.93  | 0.65             | 0.8              | 3.4  | 0    | 0                  | 0                | 0    | 0    | 0                | 0                | 0    |  |
| 200        | 4        | $t_3$                             | 0 (39.2)   | 22 (1.28)        | 31 (1.47)        | 30 (4.63) | 62.57  | 0.51             | 0.95             | 2.5  | 0.01 | 0.1                | 0.18             | 0.27 | 0.01 | 0.1              | 0.18             | 0.27 |  |
| 200        | 6        | $t_3$                             | 1 (41.23)  | 82 (2.02)        | 83 (2.09)        | 73 (4.16) | 85.49  | 1.22             | 1.44             | 4.27 | 0.03 | 0.75               | 0.78             | 0.7  | 0.03 | 0.75             | 0.78             | 0.7  |  |
| 200        | 8        | $t_3$                             | 3 (38.3)   | 86 (2.15)        | 77 (2.25)        | 67 (4.64) | 85.58  | 1.21             | 1.43             | 4.16 | 0.09 | 0.91               | 0.91             | 0.74 | 0.09 | 0.91             | 0.91             | 0.74 |  |
| 200        | 10       | $t_3$                             | 11 (33.38) | 81 (2.16)        | 78 (2.21)        | 67 (4.64) | 86.21  | 1.21             | 1.43             | 4.02 | 0.21 | 0.93               | 0.93             | 0.79 | 0.21 | 0.93             | 0.93             | 0.79 |  |

**Table S6:**  $K = 2$  simulation results for moderate-dimensional settings ( $p = 100$ ) with equal cluster sizes ( $\pi_1, \pi_2 = 1/2, 1/2$ ). Each setting was replicated 100 times. For each setting, the number of replications detecting the correct number of clusters ( $\hat{K} = 2$ ), the mean number of significant clusters (mean  $\hat{K}$ ), median computing time, and mean adjusted Rand Index (ARI) are reported for pvclust AU  $p$ -values (pvAU), SHC<sub>L</sub>, SHC<sub>2</sub>, and BootClust (BC). Results for pvclust BP  $p$ -values are omitted since no significant clusters were identified across any settings. ( $N$ : sample size,  $\delta$ : separating signal between clusters,  $F$ : cluster distribution.)

| parameters |          | $ \hat{K} = 2 $ (mean $\hat{K}$ ) |            |                  |                  | median time (sec.) |        |                  |                  | mean ARI |      |                  |                  |      |
|------------|----------|-----------------------------------|------------|------------------|------------------|--------------------|--------|------------------|------------------|----------|------|------------------|------------------|------|
| $N$        | $\delta$ | F                                 | pvAU       | SHC <sub>L</sub> | SHC <sub>2</sub> | BC                 | pv     | SHC <sub>L</sub> | SHC <sub>2</sub> | BC       | pvAU | SHC <sub>L</sub> | SHC <sub>2</sub> | BC   |
| 100        | 2        | Gaus.                             | 24 (3.04)  | 0 (1)            | 0 (1)            | 0 (5.68)           | 29.07  | 0.83             | 0.98             | 10.51    | 0    | 0                | 0                | 0.01 |
| 100        | 4        | Gaus.                             | 15 (3.98)  | 1 (1.01)         | 1 (1.01)         | 0 (4.96)           | 40.9   | 0.85             | 1.15             | 8.32     | 0    | 0.01             | 0.01             | 0.06 |
| 100        | 6        | Gaus.                             | 11 (4.32)  | 99 (1.99)        | 100 (2)          | 0 (9.82)           | 28.94  | 0                | 2                | 11.93    | 0    | 0.9              | 0.91             | 0.21 |
| 100        | 8        | Gaus.                             | 7 (4.8)    | 100 (2)          | 100 (2)          | 0 (10)             | 28.41  | 1.54             | 1.83             | 11.87    | 0.01 | 0.99             | 0.99             | 0.22 |
| 100        | 10       | Gaus.                             | 65 (2.98)  | 100 (2)          | 100 (2)          | 0 (10)             | 28.35  | 1.64             | 1.99             | 11.89    | 0.62 | 1                | 1                | 0.22 |
| 100        | 2        | $t_6$                             | 24 (3.44)  | 2 (1.02)         | 2 (1.02)         | 0 (5.5)            | 28.89  | 0.86             | 1.13             | 9.91     | 0    | 0                | 0                | 0.01 |
| 100        | 4        | $t_6$                             | 13 (3.25)  | 1 (1.01)         | 1 (1.01)         | 0 (4.78)           | 29.35  | 0.98             | 1.12             | 7.22     | 0    | 0                | 0                | 0.04 |
| 100        | 6        | $t_6$                             | 18 (4)     | 44 (1.44)        | 55 (1.55)        | 0 (7.21)           | 28.46  | 1.21             | 1.57             | 11.95    | 0    | 0.38             | 0.46             | 0.16 |
| 100        | 8        | $t_6$                             | 10 (4.73)  | 100 (2)          | 100 (2)          | 0 (10)             | 28.6   | 1.96             | 2.33             | 12.15    | 0.01 | 0.94             | 0.94             | 0.26 |
| 100        | 10       | $t_6$                             | 6 (4.95)   | 100 (2)          | 100 (2)          | 0 (10)             | 40.57  | 1.4              | 1.82             | 15.03    | 0.03 | 0.99             | 0.99             | 0.27 |
| 100        | 2        | $t_3$                             | 19 (2.73)  | 26 (1.5)         | 31 (1.51)        | 0 (8.11)           | 29.04  | 1.21             | 1.49             | 14.45    | 0    | 0                | 0                | 0    |
| 100        | 4        | $t_3$                             | 7 (3.13)   | 28 (1.38)        | 30 (1.42)        | 0 (8.11)           | 35.65  | 1.2              | 1.38             | 21.77    | 0    | 0                | 0                | 0.04 |
| 100        | 6        | $t_3$                             | 12 (3.37)  | 27 (1.4)         | 27 (1.42)        | 0 (8.2)            | 32.68  | 1.2              | 1.39             | 19.44    | 0    | 0                | 0                | 0.25 |
| 100        | 8        | $t_3$                             | 15 (4.08)  | 35 (1.55)        | 44 (1.7)         | 0 (9.19)           | 47.92  | 1.23             | 1.68             | 24.9     | 0.01 | 0.23             | 0.34             | 0.47 |
| 100        | 10       | $t_3$                             | 10 (4.29)  | 83 (2.08)        | 78 (2.2)         | 0 (10)             | 29.54  | 1.36             | 1.78             | 17.66    | 0.04 | 0.84             | 0.87             | 0.62 |
| 200        | 2        | Gaus.                             | 4 (6.53)   | 0 (1)            | 0 (1)            | 0 (1)              | 95.54  | 4.35             | 4.72             | 18.73    | 0    | 0                | 0                | 0    |
| 200        | 4        | Gaus.                             | 2 (8.35)   | 78 (1.78)        | 100 (2)          | 1 (6.32)           | 93.77  | 4.66             | 5.18             | 33.83    | 0    | 0.45             | 0.56             | 0.1  |
| 200        | 6        | Gaus.                             | 0 (9.24)   | 100 (2)          | 100 (2)          | 4 (9.68)           | 94.34  | 4.7              | 5.21             | 34.65    | 0    | 0.92             | 0.92             | 0.24 |
| 200        | 8        | Gaus.                             | 0 (10.81)  | 100 (2)          | 100 (2)          | 4 (9.68)           | 114.48 | 6.92             | 7.69             | 24.56    | 0    | 0.99             | 0.99             | 0.26 |
| 200        | 10       | Gaus.                             | 47 (6.08)  | 100 (2)          | 100 (2)          | 2 (9.84)           | 139.92 | 6.59             | 7.28             | 26.26    | 0.47 | 1                | 1                | 0.24 |
| 200        | 2        | $t_6$                             | 3 (7.22)   | 1 (1.01)         | 1 (1.01)         | 0 (1)              | 95.15  | 3.04             | 3.28             | 18.52    | 0    | 0                | 0                | 0    |
| 200        | 4        | $t_6$                             | 5 (7.78)   | 15 (1.15)        | 16 (1.16)        | 0 (1.18)           | 95.23  | 3.17             | 3.89             | 18.8     | 0    | 0.07             | 0.07             | 0    |
| 200        | 6        | $t_6$                             | 0 (9.13)   | 100 (2)          | 100 (2)          | 3 (9.76)           | 92.66  | 4.59             | 5.22             | 34.7     | 0    | 0.78             | 0.78             | 0.24 |
| 200        | 8        | $t_6$                             | 3 (9.35)   | 99 (2.01)        | 99 (2.01)        | 3 (9.76)           | 93.91  | 4.65             | 5.29             | 34.86    | 0.02 | 0.95             | 0.95             | 0.28 |
| 200        | 10       | $t_6$                             | 2 (10.76)  | 99 (2.01)        | 99 (2.01)        | 5 (9.6)            | 138.88 | 4.79             | 5.33             | 26.98    | 0.02 | 0.99             | 0.99             | 0.3  |
| 200        | 2        | $t_3$                             | 2 (6.29)   | 44 (1.94)        | 44 (1.93)        | 0 (7.3)            | 112.59 | 5.85             | 6.36             | 30.88    | 0    | 0                | 0                | 0    |
| 200        | 4        | $t_3$                             | 3 (6.09)   | 31 (1.76)        | 30 (1.76)        | 0 (7.84)           | 94.75  | 5.72             | 6.28             | 25.97    | 0    | 0                | 0                | 0.07 |
| 200        | 6        | $t_3$                             | 0 (7.79)   | 33 (1.85)        | 32 (1.92)        | 0 (8.92)           | 95.24  | 5.84             | 6.49             | 32.06    | 0    | 0.09             | 0.12             | 0.35 |
| 200        | 8        | $t_3$                             | 0 (9.34)   | 45 (2.76)        | 46 (2.87)        | 1 (9.92)           | 102.98 | 7.05             | 7.78             | 34.84    | 0    | 0.72             | 0.74             | 0.61 |
| 200        | 10       | $t_3$                             | 1 (10.23)  | 48 (2.82)        | 42 (2.97)        | 0 (10)             | 132.49 | 7.1              | 7.96             | 41.41    | 0.01 | 0.87             | 0.87             | 0.71 |
| 400        | 2        | Gaus.                             | 0 (15.93)  | 0 (1)            | 1 (1.01)         | 0 (1)              | 327.85 | 15.52            | 16.06            | 46.11    | 0    | 0                | 0                | 0    |
| 400        | 4        | Gaus.                             | 0 (18.67)  | 99 (1.99)        | 100 (2)          | 96 (1.96)          | 305.35 | 18.8             | 19.64            | 41.46    | 0    | 0.58             | 0.59             | 0.58 |
| 400        | 6        | Gaus.                             | 0 (21.48)  | 100 (2)          | 100 (2)          | 100 (2)            | 319.15 | 19.81            | 20.66            | 41.59    | 0    | 0.93             | 0.93             | 0.93 |
| 400        | 8        | Gaus.                             | 1 (22.37)  | 100 (2)          | 100 (2)          | 100 (2)            | 303.51 | 18.69            | 19.49            | 41.03    | 0.01 | 0.99             | 0.99             | 0.99 |
| 400        | 10       | Gaus.                             | 43 (13.65) | 100 (2)          | 100 (2)          | 100 (2)            | 341.81 | 21.63            | 22.83            | 53.22    | 0.43 | 1                | 1                | 1    |
| 400        | 2        | $t_6$                             | 0 (16.76)  | 1 (1.01)         | 1 (1.01)         | 0 (1)              | 357.37 | 13.02            | 13.48            | 49.08    | 0    | 0                | 0                | 0    |
| 400        | 4        | $t_6$                             | 0 (16.89)  | 60 (1.62)        | 60 (1.62)        | 40 (1.4)           | 406.8  | 17.06            | 18.2             | 63.97    | 0    | 0.25             | 0.26             | 0.17 |
| 400        | 6        | $t_6$                             | 0 (20.36)  | 99 (2.01)        | 100 (2)          | 99 (2.08)          | 315.49 | 19.17            | 20.02            | 41.78    | 0    | 0.8              | 0.8              | 0.79 |
| 400        | 8        | $t_6$                             | 1 (20.79)  | 99 (2.01)        | 99 (2.01)        | 99 (2.08)          | 317.96 | 25.68            | 26.79            | 41.37    | 0.01 | 0.95             | 0.95             | 0.95 |
| 400        | 10       | $t_6$                             | 1 (21.67)  | 100 (2)          | 100 (2)          | 100 (2)            | 323.59 | 24.01            | 24.79            | 43.86    | 0.01 | 0.99             | 0.99             | 0.99 |
| 400        | 2        | $t_3$                             | 3 (13.63)  | 38 (2.48)        | 35 (2.51)        | 0 (9.55)           | 325    | 31.91            | 34.18            | 57.36    | 0    | 0                | 0                | 0    |
| 400        | 4        | $t_3$                             | 4 (13.47)  | 40 (2.46)        | 38 (2.48)        | 0 (9.46)           | 320.67 | 33.31            | 34.9             | 57.15    | 0    | 0                | 0                | 0.11 |
| 400        | 6        | $t_3$                             | 0 (18.63)  | 27 (3.03)        | 23 (3.27)        | 3 (9.76)           | 361.27 | 27.37            | 29.8             | 60.19    | 0    | 0.32             | 0.35             | 0.44 |
| 400        | 8        | $t_3$                             | 0 (20.35)  | 22 (3.6)         | 22 (3.63)        | 8 (9.36)           | 338.65 | 28.48            | 29.66            | 54.85    | 0    | 0.73             | 0.73             | 0.68 |
| 400        | 10       | $t_3$                             | 0 (22.29)  | 26 (3.51)        | 21 (3.64)        | 9 (9.28)           | 330.3  | 27.52            | 29.02            | 55.73    | 0    | 0.87             | 0.87             | 0.81 |

**Table S7:**  $K = 2$  simulation results for high-dimensional settings ( $p = 1000$ ) with equal cluster sizes ( $\pi_1, \pi_2 = 1/2, 1/2$ ). Each setting was replicated 100 times. For each setting, the number of replications detecting the correct number of clusters ( $|\hat{K} = 2|$ ), the mean number of significant clusters (mean  $\hat{K}$ ), median computing time, and mean adjusted Rand Index (ARI) are reported for `pvcLust` AU  $p$ -values (`pvAU`), `SHCL`, `SHC2`, and `BootClust` (BC). Results for `pvcLust` BP  $p$ -values are omitted since no significant clusters were identified across any settings. `BootClust` results are not reported for the high-dimensional setting (-). ( $N$ : sample size,  $\delta$ : separating signal between clusters,  $F$ : cluster distribution.)

| $N$ | parameters |       | $ \hat{K} = 2 $ (mean $\hat{K}$ ) |                  |                  |    |        |                  | median time (sec.) |    |      |                  |                  |    | mean ARI |                  |                  |    |
|-----|------------|-------|-----------------------------------|------------------|------------------|----|--------|------------------|--------------------|----|------|------------------|------------------|----|----------|------------------|------------------|----|
|     | $\delta$   | $F$   | pvAU                              | SHC <sub>L</sub> | SHC <sub>2</sub> | BC | pv     | SHC <sub>L</sub> | SHC <sub>2</sub>   | BC | pvAU | SHC <sub>L</sub> | SHC <sub>2</sub> | BC | pvAU     | SHC <sub>L</sub> | SHC <sub>2</sub> | BC |
| 100 | 2          | Gaus. | 30 (2.15)                         | 0 (1)            | 0 (1)            | -  | 77.68  | 8.86             | 10.14              | -  | 0    | 0                | 0                | -  | 0        | 0                | 0                | -  |
| 100 | 4          | Gaus. | 32 (2.08)                         | 0 (1)            | 0 (1)            | -  | 77.86  | 8.38             | 9.6                | -  | 0    | 0                | 0                | -  | 0        | 0                | 0                | -  |
| 100 | 6          | Gaus. | 26 (2.24)                         | 0 (1)            | 0 (1)            | -  | 77.56  | 7.7              | 9.03               | -  | 0    | 0                | 0                | -  | 0        | 0                | 0                | -  |
| 100 | 8          | Gaus. | 27 (2.71)                         | 29 (1.29)        | 94 (1.94)        | -  | 77.13  | 11.75            | 15.29              | -  | 0    | 0.25             | 0.75             | -  | 0        | 0.25             | 0.75             | -  |
| 100 | 10         | Gaus. | 24 (3.08)                         | 100 (2)          | 100 (2)          | -  | 78.26  | 14.82            | 17.37              | -  | 0.01 | 0.95             | 0.95             | -  | 0.01     | 0.95             | 0.95             | -  |
| 100 | 2          | $t_6$ | 27 (2.22)                         | 0 (1)            | 0 (1)            | -  | 78.53  | 8.35             | 9.38               | -  | 0    | 0                | 0                | -  | 0        | 0                | 0                | -  |
| 100 | 4          | $t_6$ | 22 (2.22)                         | 0 (1)            | 1 (1.01)         | -  | 100.38 | 8.33             | 9.57               | -  | 0    | 0                | 0                | -  | 0        | 0                | 0                | -  |
| 100 | 6          | $t_6$ | 29 (2.14)                         | 0 (1)            | 0 (1)            | -  | 99.47  | 8.47             | 9.73               | -  | 0    | 0                | 0                | -  | 0        | 0                | 0                | -  |
| 100 | 8          | $t_6$ | 28 (2.38)                         | 0 (1)            | 0 (1)            | -  | 102.59 | 10.76            | 12.52              | -  | 0    | 0                | 0                | -  | 0        | 0                | 0                | -  |
| 100 | 10         | $t_6$ | 30 (2.29)                         | 72 (1.72)        | 73 (1.73)        | -  | 130.74 | 12.67            | 14.65              | -  | 0    | 0.61             | 0.62             | -  | 0        | 0.61             | 0.62             | -  |
| 100 | 2          | $t_3$ | 17 (1.53)                         | 43 (1.66)        | 43 (1.7)         | -  | 99.14  | 14.89            | 17.52              | -  | 0    | 0                | 0                | -  | 0        | 0                | 0                | -  |
| 100 | 4          | $t_3$ | 12 (1.42)                         | 40 (1.6)         | 38 (1.6)         | -  | 80.52  | 13.42            | 14.58              | -  | 0    | 0                | 0                | -  | 0        | 0                | 0                | -  |
| 100 | 6          | $t_3$ | 23 (1.45)                         | 34 (1.68)        | 34 (1.68)        | -  | 91.08  | 14.51            | 16.51              | -  | 0    | 0                | 0                | -  | 0        | 0                | 0                | -  |
| 100 | 8          | $t_3$ | 9 (1.58)                          | 39 (1.63)        | 40 (1.62)        | -  | 96.26  | 13.54            | 15.66              | -  | 0    | 0                | 0                | -  | 0        | 0                | 0                | -  |
| 100 | 10         | $t_3$ | 27 (1.7)                          | 38 (1.65)        | 40 (1.66)        | -  | 96.1   | 14.76            | 17.45              | -  | 0    | 0                | 0                | -  | 0        | 0                | 0                | -  |
| 200 | 2          | Gaus. | 11 (4.6)                          | 0 (1)            | 0 (1)            | -  | 410.95 | 35.6             | 38.56              | -  | 0    | 0                | 0                | -  | 0        | 0                | 0                | -  |
| 200 | 4          | Gaus. | 11 (4.56)                         | 0 (1)            | 0 (1)            | -  | 459.59 | 40.31            | 43.2               | -  | 0    | 0                | 0                | -  | 0        | 0                | 0                | -  |
| 200 | 6          | Gaus. | 9 (4.73)                          | 20 (1.2)         | 56 (1.56)        | -  | 438.72 | 31.74            | 44.62              | -  | 0    | 0.12             | 0.3              | -  | 0        | 0.12             | 0.3              | -  |
| 200 | 8          | Gaus. | 6 (5.43)                          | 100 (2)          | 100 (2)          | -  | 421.5  | 44.84            | 49.34              | -  | 0    | 0.82             | 0.82             | -  | 0        | 0.82             | 0.82             | -  |
| 200 | 10         | Gaus. | 5 (6.14)                          | 100 (2)          | 100 (2)          | -  | 438.66 | 47.8             | 51.53              | -  | 0.02 | 0.96             | 0.96             | -  | 0.02     | 0.96             | 0.96             | -  |
| 200 | 2          | $t_6$ | 14 (4.12)                         | 0 (1)            | 0 (1)            | -  | 504.84 | 31.69            | 33.87              | -  | 0    | 0                | 0                | -  | 0        | 0                | 0                | -  |
| 200 | 4          | $t_6$ | 15 (4.23)                         | 0 (1)            | 0 (1)            | -  | 329.8  | 28.83            | 31.37              | -  | 0    | 0                | 0                | -  | 0        | 0                | 0                | -  |
| 200 | 6          | $t_6$ | 12 (4.24)                         | 1 (1.01)         | 1 (1.01)         | -  | 466.4  | 30.09            | 32.53              | -  | 0    | 0                | 0                | -  | 0        | 0                | 0                | -  |
| 200 | 8          | $t_6$ | 11 (4.9)                          | 68 (1.68)        | 71 (1.71)        | -  | 408.21 | 45.61            | 49.8               | -  | 0    | 0.43             | 0.44             | -  | 0        | 0.43             | 0.44             | -  |
| 200 | 10         | $t_6$ | 5 (5.18)                          | 100 (2)          | 100 (2)          | -  | 467.84 | 45.93            | 49.63              | -  | 0    | 0.83             | 0.83             | -  | 0        | 0.83             | 0.83             | -  |
| 200 | 2          | $t_3$ | 12 (2.9)                          | 39 (2.5)         | 36 (2.54)        | -  | 369.67 | 89.11            | 96.99              | -  | 0    | 0                | 0                | -  | 0        | 0                | 0                | -  |
| 200 | 4          | $t_3$ | 5 (2.85)                          | 28 (2.81)        | 27 (2.83)        | -  | 349.23 | 84.88            | 91.4               | -  | 0    | 0                | 0                | -  | 0        | 0                | 0                | -  |
| 200 | 6          | $t_3$ | 13 (2.72)                         | 37 (2.37)        | 37 (2.43)        | -  | 290.8  | 80.9             | 89.34              | -  | 0    | 0                | 0                | -  | 0        | 0                | 0                | -  |
| 200 | 8          | $t_3$ | 8 (3.34)                          | 33 (2.6)         | 30 (2.62)        | -  | 292.14 | 79.43            | 86.33              | -  | 0    | 0                | 0                | -  | 0        | 0                | 0                | -  |
| 200 | 10         | $t_3$ | 16 (2.98)                         | 40 (2.28)        | 39 (2.3)         | -  | 373.17 | 62.86            | 67.59              | -  | 0    | 0                | 0                | -  | 0        | 0                | 0                | -  |

**Table S8:**  $K = 2$  simulation results with unequal cluster sizes ( $\pi_1, \pi_2 = 1/3, 2/3$ ). Each setting was replicated 100 times. For each setting, the number of replications detecting the correct number of clusters ( $|\hat{K} = 2|$ ), the mean number of significant clusters (mean  $\hat{K}$ ), median computing time, and mean adjusted Rand Index (ARI) are reported for pvclust AU  $p$ -values (pvAU), SHC<sub>L</sub>, SHC<sub>2</sub>, and BootClust (BC). Results for pvclust BP  $p$ -values are omitted since no significant clusters were identified across any settings. BootClust results are not reported for the high-dimensional setting (—). ( $N$ : sample size,  $p$ : dimension,  $\delta$ : separating signal between clusters,  $F$ : cluster distribution.)

| $N$ | $p$  | $\delta$ | parameters |            |           | $ \hat{K} = 2 $ (mean $\hat{K}$ ) |           |                  |       |                  |       | median time (sec.) |      |      |      |                  |      | mean ARI         |      |      |      |      |      |                  |      |                  |      |      |      |
|-----|------|----------|------------|------------|-----------|-----------------------------------|-----------|------------------|-------|------------------|-------|--------------------|------|------|------|------------------|------|------------------|------|------|------|------|------|------------------|------|------------------|------|------|------|
|     |      |          | $F$        |            |           | pvAU                              |           | SHC <sub>L</sub> |       | SHC <sub>2</sub> |       | BC                 |      | pv   |      | SHC <sub>L</sub> |      | SHC <sub>2</sub> |      | BC   |      | pvAU |      | SHC <sub>L</sub> |      | SHC <sub>2</sub> |      | BC   |      |
|     |      |          |            |            |           |                                   |           |                  |       |                  |       |                    |      |      |      |                  |      |                  |      |      |      |      |      |                  |      |                  |      |      |      |
| 100 | 10   | 2        | Gaus.      | 0 (18.64)  | 0 (1)     | 0 (1)                             | 0 (1)     | 0 (1)            | 0 (1) | 0 (1)            | 0 (1) | 35.5               | 0.25 | 0.36 | 1.24 | 0.01             | 0    | 0                | 0    | 0    | 0.01 | 0    | 0    | 0                | 0    | 0                | 0    | 0    |      |
| 100 | 10   | 4        | Gaus.      | 3 (18.94)  | 58 (1.58) | 84 (1.84)                         | 69 (1.69) | 27.32            | 0.29  | 0.55             | 1.21  | 0.05               | 0.5  | 0.7  | 0.58 | 0.05             | 0.5  | 0.7              | 0.58 | 0.98 | 0.98 | 0.98 | 0.98 | 0.98             | 0.98 | 0.98             | 0.98 | 0.98 | 0.98 |
| 100 | 10   | 6        | Gaus.      | 27 (14.41) | 100 (2)   | 100 (2)                           | 100 (2)   | 25.86            | 0.35  | 0.57             | 1.03  | 0.28               | 0.28 | 0.98 | 0.98 | 0.98             | 0.98 | 0.98             | 0.98 | 0.98 | 0.98 | 0.98 | 0.98 | 0.98             | 0.98 | 0.98             | 0.98 | 0.98 | 0.98 |
| 100 | 10   | 8        | Gaus.      | 78 (5.58)  | 100 (2)   | 100 (2)                           | 100 (2)   | 26.35            | 0.41  | 0.64             | 1.12  | 0.79               | 1    | 1    | 1    | 0.81             | 1    | 1                | 1    | 1    | 1    | 1    | 1    | 1                | 1    | 1                | 1    | 1    | 1    |
| 100 | 10   | 10       | Gaus.      | 81 (5.24)  | 100 (2)   | 100 (2)                           | 100 (2)   | 27.87            | 0.43  | 0.64             | 1.21  | 0.81               | 1    | 1    | 1    | 0.81             | 1    | 1                | 1    | 1    | 1    | 1    | 1    | 1                | 1    | 1                | 1    | 1    | 1    |
| 200 | 10   | 2        | Gaus.      | 0 (43.03)  | 2 (1.02)  | 1 (1.01)                          | 2 (1.02)  | 87.12            | 0.78  | 0.98             | 3.81  | 0                  | 0.01 | 0.01 | 0.01 | 0                | 0.01 | 0.01             | 0.01 | 0.01 | 0.01 | 0.01 | 0.01 | 0.01             | 0.01 | 0.01             | 0.01 | 0.01 | 0.01 |
| 200 | 10   | 4        | Gaus.      | 0 (43.31)  | 96 (1.96) | 98 (1.98)                         | 96 (1.96) | 89.91            | 1.34  | 1.62             | 4.57  | 0.01               | 0.78 | 0.8  | 0.78 | 0.01             | 0.78 | 0.8              | 0.78 | 0.8  | 0.78 | 0.8  | 0.78 | 0.8              | 0.78 | 0.8              | 0.78 | 0.8  | 0.78 |
| 200 | 10   | 6        | Gaus.      | 29 (31.86) | 100 (2)   | 100 (2)                           | 100 (2)   | 79.69            | 1.17  | 1.47             | 3.77  | 0.29               | 0.98 | 0.98 | 0.98 | 0.29             | 0.98 | 0.98             | 0.98 | 0.98 | 0.98 | 0.98 | 0.98 | 0.98             | 0.98 | 0.98             | 0.98 | 0.98 | 0.98 |
| 200 | 10   | 8        | Gaus.      | 73 (12.8)  | 100 (2)   | 100 (2)                           | 100 (2)   | 87.32            | 1.21  | 1.58             | 4.14  | 0.73               | 1    | 1    | 1    | 0.73             | 1    | 1                | 1    | 1    | 1    | 1    | 1    | 1                | 1    | 1                | 1    | 1    | 1    |
| 200 | 10   | 10       | Gaus.      | 78 (10.95) | 100 (2)   | 100 (2)                           | 100 (2)   | 85.65            | 1.29  | 1.56             | 4.24  | 0.78               | 1    | 1    | 1    | 0.78             | 1    | 1                | 1    | 1    | 1    | 1    | 1    | 1                | 1    | 1                | 1    | 1    | 1    |
| 100 | 100  | 2        | Gaus.      | 19 (3.32)  | 0 (1)     | 0 (1)                             | 0 (5.5)   | 37.51            | 1.03  | 1.21             | 8.56  | 0                  | 0    | 0    | 0    | 0                | 0    | 0                | 0    | 0    | 0    | 0    | 0    | 0                | 0    | 0                | 0    | 0    | 0    |
| 100 | 100  | 4        | Gaus.      | 16 (3.87)  | 0 (1)     | 0 (1)                             | 0 (5.68)  | 32.22            | 0.97  | 1.13             | 8.88  | 0                  | 0    | 0    | 0    | 0                | 0    | 0                | 0    | 0    | 0    | 0    | 0    | 0                | 0    | 0                | 0    | 0    | 0    |
| 100 | 100  | 6        | Gaus.      | 19 (4.09)  | 91 (1.91) | 97 (1.97)                         | 0 (9.73)  | 32.57            | 1.98  | 2.37             | 11.93 | 0                  | 0.84 | 0.88 | 0.17 | 0.84             | 0.88 | 0.17             | 0.88 | 0.17 | 0.88 | 0.17 | 0.88 | 0.17             | 0.88 | 0.17             | 0.88 | 0.17 | 0.88 |
| 100 | 100  | 8        | Gaus.      | 7 (4.77)   | 100 (2)   | 100 (2)                           | 0 (10)    | 34.66            | 1.45  | 1.79             | 12.19 | 0.01               | 0.99 | 0.99 | 0.18 | 0.99             | 0.99 | 0.18             | 0.99 | 0.18 | 0.99 | 0.18 | 0.99 | 0.18             | 0.99 | 0.18             | 0.99 | 0.18 | 0.99 |
| 100 | 100  | 10       | Gaus.      | 69 (2.9)   | 100 (2)   | 100 (2)                           | 0 (10)    | 36.81            | 1.5   | 1.83             | 11.62 | 0.63               | 1    | 1    | 0.18 | 0.63             | 1    | 1                | 0.18 | 0.63 | 1    | 1    | 0.18 | 0.63             | 1    | 1                | 0.18 | 0.63 | 1    |
| 200 | 100  | 2        | Gaus.      | 2 (6.87)   | 0 (1)     | 0 (1)                             | 0 (1)     | 113.37           | 4.56  | 4.98             | 20.08 | 0                  | 0    | 0    | 0    | 0                | 0    | 0                | 0    | 0    | 0    | 0    | 0    | 0                | 0    | 0                | 0    | 0    | 0    |
| 200 | 100  | 4        | Gaus.      | 1 (8.35)   | 56 (1.56) | 95 (1.95)                         | 0 (3.97)  | 110.2            | 4.83  | 7.71             | 21.22 | 0                  | 0.35 | 0.54 | 0.04 | 0.35             | 0.54 | 0.04             | 0.35 | 0.54 | 0.04 | 0.35 | 0.54 | 0.04             | 0.35 | 0.54             | 0.04 | 0.35 | 0.54 |
| 200 | 100  | 6        | Gaus.      | 2 (8.8)    | 100 (2)   | 100 (2)                           | 0 (10)    | 113.56           | 6.4   | 7.09             | 28.89 | 0.01               | 0.92 | 0.92 | 0.17 | 0.92             | 0.92 | 0.17             | 0.92 | 0.17 | 0.92 | 0.17 | 0.92 | 0.17             | 0.92 | 0.17             | 0.92 | 0.17 | 0.92 |
| 200 | 100  | 8        | Gaus.      | 4 (9.52)   | 100 (2)   | 100 (2)                           | 0 (10)    | 113.01           | 4.86  | 5.43             | 29.26 | 0.04               | 0.99 | 0.99 | 0.19 | 0.99             | 0.99 | 0.19             | 0.99 | 0.19 | 0.99 | 0.19 | 0.99 | 0.19             | 0.99 | 0.19             | 0.99 | 0.19 | 0.99 |
| 200 | 100  | 10       | Gaus.      | 48 (6.11)  | 100 (2)   | 100 (2)                           | 0 (10)    | 112.62           | 4.89  | 5.44             | 35.44 | 0.48               | 1    | 1    | 0.18 | 0.48             | 1    | 1                | 0.18 | 0.48 | 1    | 1    | 0.18 | 0.48             | 1    | 1                | 0.18 | 0.48 | 1    |
| 100 | 1000 | 2        | Gaus.      | 25 (2.34)  | 0 (1)     | 0 (1)                             | —         | 79.56            | 7.58  | 8.87             | —     | 0                  | 0    | 0    | —    | 0                | 0    | 0                | —    | 0    | 0    | 0    | —    | 0                | 0    | 0                | —    | 0    | 0    |
| 100 | 1000 | 4        | Gaus.      | 29 (2.39)  | 0 (1)     | 0 (1)                             | —         | 96.62            | 8.03  | 9.41             | —     | 0                  | 0    | 0    | —    | 0                | 0    | 0                | —    | 0    | 0    | 0    | —    | 0                | 0    | 0                | —    | 0    | 0    |
| 100 | 1000 | 6        | Gaus.      | 25 (2.17)  | 0 (1)     | 1 (1.01)                          | —         | 108.93           | 10.14 | 11.82            | —     | 0                  | 0    | 0    | —    | 0                | 0    | 0                | —    | 0    | 0    | 0    | —    | 0                | 0    | 0                | —    | 0    | 0    |
| 100 | 1000 | 8        | Gaus.      | 21 (2.51)  | 12 (1.12) | 87 (1.87)                         | —         | 115.93           | 8.37  | 15.35            | —     | 0                  | 0.11 | 0.71 | —    | 0                | 0.11 | 0.71             | —    | 0    | 0.11 | 0.71 | —    | 0                | 0.11 | 0.71             | —    | 0    | 0.11 |
| 100 | 1000 | 10       | Gaus.      | 26 (3.13)  | 100 (2)   | 100 (2)                           | —         | 115.47           | 14.98 | 17.2             | —     | 0.01               | 0.95 | 0.95 | —    | 0.01             | 0.95 | 0.95             | —    | 0.01 | 0.95 | 0.95 | —    | 0.01             | 0.95 | 0.95             | —    | 0.01 | 0.95 |
| 200 | 1000 | 2        | Gaus.      | 9 (4.76)   | 0 (1)     | 0 (1)                             | —         | 386.58           | 29.23 | 32.1             | —     | 0                  | 0    | 0    | —    | 0                | 0    | 0                | —    | 0    | 0    | 0    | —    | 0                | 0    | 0                | —    | 0    | 0    |
| 200 | 1000 | 4        | Gaus.      | 13 (3.93)  | 0 (1)     | 0 (1)                             | —         | 379.9            | 27.61 | 30.15            | —     | 0                  | 0    | 0    | —    | 0                | 0    | 0                | —    | 0    | 0    | 0    | —    | 0                | 0    | 0                | —    | 0    | 0    |
| 200 | 1000 | 6        | Gaus.      | 7 (5.21)   | 5 (1.05)  | 42 (1.42)                         | —         | 339.59           | 32.37 | 48.99            | —     | 0                  | 0.03 | 0.24 | —    | 0                | 0.03 | 0.24             | —    | 0    | 0.03 | 0.24 | —    | 0                | 0.03 | 0.24             | —    | 0    | 0.03 |
| 200 | 1000 | 8        | Gaus.      | 10 (5.19)  | 100 (2)   | 100 (2)                           | —         | 404.11           | 49.67 | 53.81            | —     | 0                  | 0.83 | 0.83 | —    | 0                | 0.83 | 0.83             | —    | 0    | 0.83 | 0.83 | —    | 0                | 0.83 | 0.83             | —    | 0    | 0.83 |
| 200 | 1000 | 10       | Gaus.      | 4 (6.09)   | 100 (2)   | 100 (2)                           | —         | 297.35           | 47.2  | 51.3             | —     | 0.01               | 0.96 | 0.96 | —    | 0.01             | 0.96 | 0.96             | —    | 0.01 | 0.96 | 0.96 | —    | 0.01             | 0.96 | 0.96             | —    | 0.01 | 0.96 |

**Table S9:**  $K = 2$  simulation results with unequal cluster sizes ( $\pi_1, \pi_2 = 1/4, 3/4$ ). Each setting was replicated 100 times. For each setting, the number of replications detecting the correct number of clusters ( $|\hat{K} = 2|$ ), the mean number of significant clusters (mean  $\hat{K}$ ), median computing time, and mean adjusted Rand Index (ARI) are reported for pvclust AU  $p$ -values (pvAU), SHC<sub>L</sub>, SHC<sub>2</sub>, and BootClust (BC). Results for pvclust BP  $p$ -values are omitted since no significant clusters were identified across any settings. BootClust results are not reported for the high-dimensional setting (–). ( $N$ : sample size,  $p$ : dimension,  $\delta$ : separating signal between clusters,  $F$ : cluster distribution.)

| $N$ | $p$  | $\delta$ | parameters |            |           | $ \hat{K} = 2 $ (mean $\hat{K}$ ) |           |                  |       |       |       | median time (sec.) |      |                  |      |                  |      | mean ARI |      |      |      |                  |      |                  |      |      |  |
|-----|------|----------|------------|------------|-----------|-----------------------------------|-----------|------------------|-------|-------|-------|--------------------|------|------------------|------|------------------|------|----------|------|------|------|------------------|------|------------------|------|------|--|
|     |      |          | $F$        |            |           | SHC <sub>L</sub>                  |           | SHC <sub>2</sub> |       | BC    |       | pv                 |      | SHC <sub>L</sub> |      | SHC <sub>2</sub> |      | BC       |      | pvAU |      | SHC <sub>L</sub> |      | SHC <sub>2</sub> |      | BC   |  |
|     |      |          |            |            |           |                                   |           |                  |       |       |       |                    |      |                  |      |                  |      |          |      |      |      |                  |      |                  |      |      |  |
| 100 | 10   | 2        | Gaus.      | 0 (19)     | 0 (1)     | 0 (1)                             | 0 (1)     | 0 (1)            | 0 (1) | 26.9  | 0.24  | 0.35               | 1.2  | 0.01             | 0    | 0                | 0    | 0        | 0    | 0.01 | 0    | 0                | 0    | 0                | 0    | 0    |  |
| 100 | 10   | 4        | Gaus.      | 2 (18.43)  | 27 (1.27) | 61 (1.61)                         | 42 (1.42) | 29.3             | 0.25  | 0.46  | 1.21  | 0.03               | 0.23 | 0.52             | 0.36 | 0.98             | 0.98 | 0.98     | 0.98 | 0.03 | 0.23 | 0.52             | 0.36 | 0.98             | 0.98 | 0.98 |  |
| 100 | 10   | 6        | Gaus.      | 36 (12.91) | 100 (2)   | 100 (2)                           | 100 (2)   | 30.19            | 0.45  | 0.65  | 1.2   | 0.37               | 0.98 | 1                | 1    | 1                | 1    | 1        | 1    | 0.37 | 0.98 | 1                | 1    | 1                | 1    | 1    |  |
| 100 | 10   | 8        | Gaus.      | 82 (4.98)  | 100 (2)   | 100 (2)                           | 100 (2)   | 30.04            | 0.44  | 0.66  | 1.19  | 0.82               | 1    | 1                | 1    | 1                | 1    | 1        | 0.82 | 1    | 1    | 1                | 1    | 1                | 1    | 1    |  |
| 100 | 10   | 10       | Gaus.      | 82 (4.82)  | 100 (2)   | 100 (2)                           | 100 (2)   | 25.42            | 0.33  | 0.59  | 1.13  | 0.82               | 1    | 1                | 1    | 1                | 1    | 1        | 0.82 | 1    | 1    | 1                | 1    | 1                | 1    | 1    |  |
| 200 | 10   | 2        | Gaus.      | 0 (41.65)  | 0 (1)     | 1 (1.01)                          | 0 (1)     | 91.71            | 0.81  | 1     | 4.54  | 0                  | 0    | 0                | 0    | 0                | 0    | 0        | 0    | 0    | 0    | 0                | 0    | 0                | 0    | 0    |  |
| 200 | 10   | 4        | Gaus.      | 2 (42.43)  | 87 (1.87) | 94 (1.94)                         | 94 (1.94) | 89.53            | 1.32  | 1.67  | 4.45  | 0.03               | 0.73 | 0.78             | 0.78 | 0.78             | 0.78 | 0.78     | 0.78 | 0.03 | 0.73 | 0.78             | 0.78 | 0.78             | 0.78 | 0.78 |  |
| 200 | 10   | 6        | Gaus.      | 28 (32.01) | 100 (2)   | 100 (2)                           | 100 (2)   | 92.3             | 1.38  | 1.7   | 4.47  | 0.28               | 0.99 | 0.99             | 0.99 | 0.99             | 0.99 | 0.99     | 0.28 | 0.99 | 0.99 | 0.99             | 0.99 | 0.99             | 0.99 | 0.99 |  |
| 200 | 10   | 8        | Gaus.      | 76 (11.37) | 100 (2)   | 100 (2)                           | 100 (2)   | 95.31            | 1.35  | 1.68  | 4.47  | 0.76               | 1    | 1                | 1    | 1                | 1    | 1        | 0.76 | 1    | 1    | 1                | 1    | 1                | 1    | 1    |  |
| 200 | 10   | 10       | Gaus.      | 81 (9.49)  | 100 (2)   | 100 (2)                           | 100 (2)   | 80.25            | 1.14  | 1.5   | 3.55  | 0.81               | 1    | 1                | 1    | 1                | 1    | 1        | 0.81 | 1    | 1    | 1                | 1    | 1                | 1    | 1    |  |
| 100 | 100  | 2        | Gaus.      | 23 (2.99)  | 0 (1)     | 0 (1)                             | 0 (5.5)   | 33.36            | 1.2   | 1.38  | 8.84  | 0                  | 0    | 0                | 0.01 | 0                | 0    | 0        | 0    | 0    | 0    | 0                | 0    | 0                | 0.01 | 0    |  |
| 100 | 100  | 4        | Gaus.      | 19 (3.53)  | 0 (1)     | 0 (1)                             | 0 (5.41)  | 35.61            | 1.05  | 1.23  | 8.82  | 0                  | 0    | 0                | 0.04 | 0                | 0    | 0        | 0    | 0    | 0    | 0                | 0    | 0                | 0.04 | 0    |  |
| 100 | 100  | 6        | Gaus.      | 5 (4.47)   | 83 (1.83) | 85 (1.85)                         | 0 (9.19)  | 33.89            | 1.43  | 1.75  | 11.79 | 0                  | 0.76 | 0.78             | 0.12 | 0.12             | 0.12 | 0.12     | 0    | 0.76 | 0.78 | 0.78             | 0.78 | 0.78             | 0.12 | 0.12 |  |
| 100 | 100  | 8        | Gaus.      | 17 (4.09)  | 100 (2)   | 100 (2)                           | 0 (10)    | 35.25            | 1.8   | 2.15  | 14.17 | 0.06               | 0.99 | 0.99             | 0.14 | 0.14             | 0.14 | 0.14     | 0.06 | 0.99 | 0.99 | 0.99             | 0.99 | 0.99             | 0.14 | 0.14 |  |
| 100 | 100  | 10       | Gaus.      | 58 (3.2)   | 100 (2)   | 100 (2)                           | 0 (10)    | 35.32            | 1.7   | 2.06  | 10.91 | 0.53               | 1    | 1                | 0.14 | 0.14             | 0.14 | 0.14     | 0.53 | 1    | 1    | 1                | 1    | 1                | 0.14 | 0.14 |  |
| 200 | 100  | 2        | Gaus.      | 1 (7.08)   | 0 (1)     | 0 (1)                             | 0 (1)     | 111.17           | 2.99  | 3.35  | 20.12 | 0                  | 0    | 0                | 0    | 0                | 0    | 0        | 0    | 0    | 0    | 0                | 0    | 0                | 0    | 0    |  |
| 200 | 100  | 4        | Gaus.      | 0 (7.97)   | 33 (1.33) | 86 (1.86)                         | 0 (2.53)  | 108.1            | 4.29  | 6.42  | 19.1  | 0                  | 0.22 | 0.52             | 0.02 | 0.02             | 0.02 | 0.02     | 0    | 0.22 | 0.52 | 0.52             | 0.52 | 0.02             | 0.02 | 0.02 |  |
| 200 | 100  | 6        | Gaus.      | 1 (8.65)   | 100 (2)   | 100 (2)                           | 0 (10)    | 114.39           | 5.01  | 5.59  | 40.72 | 0                  | 0.92 | 0.92             | 0.13 | 0.13             | 0.13 | 0.13     | 0    | 0.92 | 0.92 | 0.92             | 0.92 | 0.92             | 0.13 | 0.13 |  |
| 200 | 100  | 8        | Gaus.      | 0 (9.72)   | 100 (2)   | 100 (2)                           | 0 (10)    | 113.36           | 6.28  | 6.97  | 32.28 | 0                  | 0.99 | 0.99             | 0.14 | 0.14             | 0.14 | 0.14     | 0    | 0.99 | 0.99 | 0.99             | 0.99 | 0.99             | 0.14 | 0.14 |  |
| 200 | 100  | 10       | Gaus.      | 52 (5.24)  | 100 (2)   | 100 (2)                           | 0 (10)    | 111.21           | 5.02  | 5.58  | 30.44 | 0.52               | 1    | 1                | 0.15 | 0.15             | 0.15 | 0.15     | 0.52 | 1    | 1    | 1                | 1    | 1                | 0.15 | 0.15 |  |
| 100 | 1000 | 2        | Gaus.      | 28 (2.23)  | 0 (1)     | 0 (1)                             | –         | 100.63           | 7.84  | 9.18  | –     | –                  | –    | –                | –    | –                | –    | –        | –    | –    | –    | –                | –    | –                | –    | –    |  |
| 100 | 1000 | 4        | Gaus.      | 35 (2.12)  | 0 (1)     | 0 (1)                             | –         | 101.05           | 8.34  | 9.72  | –     | –                  | –    | –                | –    | –                | –    | –        | –    | –    | –    | –                | –    | –                | –    | –    |  |
| 100 | 1000 | 6        | Gaus.      | 27 (2.14)  | 0 (1)     | 0 (1)                             | –         | 89.12            | 8.5   | 9.73  | –     | –                  | –    | –                | –    | –                | –    | –        | –    | –    | –    | –                | –    | –                | –    | –    |  |
| 100 | 1000 | 8        | Gaus.      | 35 (2.4)   | 2 (1.02)  | 74 (1.74)                         | –         | 107.48           | 8.22  | 15.27 | –     | –                  | –    | –                | –    | –                | –    | –        | –    | –    | –    | –                | –    | –                | –    | –    |  |
| 100 | 1000 | 10       | Gaus.      | 17 (3.22)  | 94 (1.94) | 100 (2)                           | –         | 100.41           | 13.61 | 16.15 | –     | –                  | –    | –                | –    | –                | –    | –        | –    | –    | –    | –                | –    | –                | –    | –    |  |
| 200 | 1000 | 2        | Gaus.      | 17 (4.38)  | 0 (1)     | 0 (1)                             | –         | 377.7            | 34.79 | 37.73 | –     | –                  | –    | –                | –    | –                | –    | –        | –    | –    | –    | –                | –    | –                | –    | –    |  |
| 200 | 1000 | 4        | Gaus.      | 8 (4.74)   | 0 (1)     | 0 (1)                             | –         | 390.02           | 43.52 | 45.97 | –     | –                  | –    | –                | –    | –                | –    | –        | –    | –    | –    | –                | –    | –                | –    | –    |  |
| 200 | 1000 | 6        | Gaus.      | 11 (4.61)  | 0 (1)     | 19 (1.19)                         | –         | 386.08           | 40.65 | 44.54 | –     | –                  | –    | –                | –    | –                | –    | –        | –    | –    | –    | –                | –    | –                | –    | –    |  |
| 200 | 1000 | 8        | Gaus.      | 4 (5.31)   | 100 (2)   | 100 (2)                           | –         | 382.49           | 52.99 | 57.31 | –     | –                  | –    | –                | –    | –                | –    | –        | –    | –    | –    | –                | –    | –                | –    | –    |  |
| 200 | 1000 | 10       | Gaus.      | 4 (5.88)   | 100 (2)   | 100 (2)                           | –         | 392.09           | 56.6  | 61.28 | –     | –                  | –    | –                | –    | –                | –    | –        | –    | –    | –    | –                | –    | –                | –    | –    |  |



**Table S10:**  $K = 3$  simulation results for low-dimensional settings ( $p = 10$ ) with equal cluster sizes ( $\pi_1, \pi_2, \pi_3 = 1/3, 1/3, 1/3$ ) and clusters arranged along a line. Each setting was replicated 100 times. For each setting, the number of replications detecting the correct number of clusters ( $\hat{K} = 3$ ), the mean number of significant clusters (mean  $\hat{K}$ ), median computing time, and mean adjusted Rand Index (ARI) are reported for pvClust AU  $p$ -values (pvAU), SHC<sub>L</sub>, SHC<sub>2</sub>, and BootClust (BC). Results for pvClust BP  $p$ -values are omitted since no significant clusters were identified across any settings. ( $N$ : sample size,  $\delta$ : separating signal between clusters,  $F$ : cluster distribution.)

| $N$ | $\delta$ | $F$   | parameters                        |                  |                  |           |        |                    |                  |      |      |                  | mean ARI         |      |      |                  |                  |      |
|-----|----------|-------|-----------------------------------|------------------|------------------|-----------|--------|--------------------|------------------|------|------|------------------|------------------|------|------|------------------|------------------|------|
|     |          |       | $ \hat{K} = 3 $ (mean $\hat{K}$ ) |                  |                  |           |        | median time (sec.) |                  |      |      |                  | SHC <sub>L</sub> |      |      | SHC <sub>2</sub> |                  |      |
|     |          |       | pvAU                              | SHC <sub>L</sub> | SHC <sub>2</sub> | BC        | pv     | SHC <sub>L</sub>   | SHC <sub>2</sub> | BC   | pvAU | SHC <sub>L</sub> | SHC <sub>2</sub> | BC   | pvAU | SHC <sub>L</sub> | SHC <sub>2</sub> | BC   |
| 150 | 2        | Gaus. | 0 (31.52)                         | 0 (1.05)         | 0 (1.19)         | 0 (1.08)  | 50.11  | 0.45               | 0.57             | 2.43 | 0.02 | 0.02             | 0.07             | 0.03 | 0.02 | 0.02             | 0.07             | 0.03 |
| 150 | 4        | Gaus. | 0 (30.34)                         | 4 (1.2)          | 59 (2.32)        | 12 (1.27) | 38.69  | 0.41               | 0.85             | 1.95 | 0.07 | 0.1              | 0.57             | 0.12 | 0.1  | 0.57             | 0.12             | 0.12 |
| 150 | 6        | Gaus. | 0 (20.69)                         | 20 (1.4)         | 96 (2.92)        | 66 (2.32) | 38.07  | 0.39               | 0.95             | 2.01 | 0.26 | 0.2              | 0.94             | 0.65 | 0.2  | 0.94             | 0.65             | 0.65 |
| 150 | 8        | Gaus. | 1 (7.37)                          | 47 (1.94)        | 99 (2.98)        | 93 (2.86) | 37.86  | 0.47               | 0.97             | 2.03 | 0.5  | 0.47             | 0.99             | 0.93 | 0.5  | 0.47             | 0.99             | 0.93 |
| 150 | 10       | Gaus. | 1 (7.35)                          | 43 (1.86)        | 100 (3)          | 98 (2.96) | 39.07  | 0.48               | 0.89             | 1.37 | 0.49 | 0.43             | 1                | 0.98 | 0.43 | 1                | 0.98             | 1    |
| 150 | 2        | $t_6$ | 0 (29.59)                         | 0 (1.03)         | 0 (1.05)         | 0 (1.14)  | 51.39  | 0.45               | 0.56             | 2.27 | 0.01 | 0.01             | 0.02             | 0.02 | 0.01 | 0.01             | 0.02             | 0.02 |
| 150 | 4        | $t_6$ | 0 (28.86)                         | 2 (1.15)         | 20 (1.74)        | 14 (1.53) | 51.17  | 0.45               | 0.72             | 2.33 | 0.05 | 0.07             | 0.32             | 0.15 | 0.05 | 0.07             | 0.32             | 0.15 |
| 150 | 6        | $t_6$ | 0 (26.87)                         | 14 (1.29)        | 93 (2.89)        | 65 (2.31) | 42.67  | 0.31               | 0.88             | 1.6  | 0.13 | 0.14             | 0.87             | 0.61 | 0.13 | 0.14             | 0.87             | 0.61 |
| 150 | 8        | $t_6$ | 0 (18.25)                         | 39 (1.78)        | 99 (2.98)        | 97 (2.94) | 41.85  | 0.31               | 0.85             | 1.57 | 0.3  | 0.38             | 0.97             | 0.95 | 0.3  | 0.38             | 0.97             | 0.95 |
| 150 | 10       | $t_6$ | 0 (11.21)                         | 40 (1.8)         | 100 (3)          | 100 (3)   | 42.37  | 0.31               | 0.85             | 1.56 | 0.43 | 0.4              | 0.99             | 0.99 | 0.43 | 0.4              | 0.99             | 0.99 |
| 150 | 2        | $t_3$ | 0 (26.48)                         | 1 (1.14)         | 0 (1.16)         | 0 (4.69)  | 46.46  | 0.46               | 0.56             | 2.31 | 0.01 | 0                | 0                | 0.05 | 0    | 0                | 0                | 0.05 |
| 150 | 4        | $t_3$ | 0 (28.47)                         | 3 (1.18)         | 7 (1.38)         | 2 (4.82)  | 39.27  | 0.41               | 0.55             | 2.14 | 0.02 | 0.05             | 0.11             | 0.26 | 0.02 | 0.05             | 0.11             | 0.26 |
| 150 | 6        | $t_3$ | 0 (28.03)                         | 6 (1.24)         | 48 (2.34)        | 59 (4.07) | 39.69  | 0.43               | 0.88             | 2    | 0.08 | 0.09             | 0.52             | 0.62 | 0.08 | 0.09             | 0.52             | 0.62 |
| 150 | 8        | $t_3$ | 2 (25.31)                         | 27 (1.61)        | 78 (2.94)        | 76 (4.14) | 49.05  | 0.46               | 1.16             | 2.43 | 0.19 | 0.28             | 0.83             | 0.82 | 0.19 | 0.28             | 0.83             | 0.82 |
| 150 | 10       | $t_3$ | 1 (19.71)                         | 41 (1.91)        | 71 (3.16)        | 67 (5.22) | 62.72  | 0.55               | 1.38             | 2.74 | 0.32 | 0.42             | 0.91             | 0.86 | 0.32 | 0.42             | 0.91             | 0.86 |
| 300 | 2        | Gaus. | 0 (68.22)                         | 0 (1.29)         | 0 (1.43)         | 3 (1.24)  | 134.97 | 1.17               | 1.61             | 6.19 | 0.01 | 0.11             | 0.16             | 0.08 | 0.01 | 0.11             | 0.16             | 0.08 |
| 300 | 4        | Gaus. | 0 (69.98)                         | 64 (2.34)        | 92 (2.86)        | 96 (2.97) | 134.48 | 1.99               | 2.38             | 6.11 | 0.02 | 0.56             | 0.76             | 0.8  | 0.02 | 0.56             | 0.76             | 0.8  |
| 300 | 6        | Gaus. | 0 (50.43)                         | 89 (2.78)        | 100 (3)          | 100 (3)   | 137.22 | 2.13               | 2.45             | 5.98 | 0.18 | 0.88             | 0.98             | 0.98 | 0.18 | 0.88             | 0.98             | 0.98 |
| 300 | 8        | Gaus. | 0 (13.7)                          | 97 (2.94)        | 100 (3)          | 100 (3)   | 134.46 | 2.04               | 2.35             | 5.97 | 0.49 | 0.97             | 1                | 1    | 0.49 | 0.97             | 1                | 1    |
| 300 | 10       | Gaus. | 2 (12.18)                         | 95 (2.9)         | 100 (3)          | 100 (3)   | 134.12 | 2.08               | 2.37             | 5.96 | 0.51 | 0.95             | 1                | 1    | 0.51 | 0.95             | 1                | 1    |
| 300 | 2        | $t_6$ | 0 (66.21)                         | 0 (1.1)          | 0 (1.18)         | 0 (1.16)  | 134.69 | 1.08               | 1.34             | 6.24 | 0.01 | 0.03             | 0.06             | 0.05 | 0.01 | 0.03             | 0.06             | 0.05 |
| 300 | 4        | $t_6$ | 0 (66.82)                         | 29 (1.77)        | 66 (2.5)         | 83 (2.94) | 135.17 | 1.25               | 2.32             | 6.16 | 0.01 | 0.3              | 0.55             | 0.64 | 0.01 | 0.3              | 0.55             | 0.64 |
| 300 | 6        | $t_6$ | 0 (62.29)                         | 80 (2.6)         | 100 (3)          | 100 (3)   | 133.77 | 2.03               | 2.41             | 6.06 | 0.08 | 0.74             | 0.92             | 0.92 | 0.08 | 0.74             | 0.92             | 0.92 |
| 300 | 8        | $t_6$ | 0 (52.95)                         | 94 (2.88)        | 100 (3)          | 100 (3)   | 134.57 | 2.1                | 2.39             | 6.01 | 0.17 | 0.92             | 0.98             | 0.98 | 0.17 | 0.92             | 0.98             | 0.98 |
| 300 | 10       | $t_6$ | 0 (21.61)                         | 94 (2.88)        | 100 (3)          | 100 (3)   | 135.46 | 2.06               | 2.39             | 5.99 | 0.44 | 0.93             | 0.99             | 0.99 | 0.44 | 0.93             | 0.99             | 0.99 |
| 300 | 2        | $t_3$ | 0 (61.51)                         | 0 (1.06)         | 1 (1.09)         | 0 (5.42)  | 139.72 | 1.09               | 1.37             | 6.32 | 0.01 | 0                | 0                | 0.08 | 0.01 | 0                | 0                | 0.08 |
| 300 | 4        | $t_3$ | 0 (62.93)                         | 5 (1.36)         | 11 (1.62)        | 19 (6.35) | 136.35 | 1.09               | 1.42             | 6.36 | 0.01 | 0.11             | 0.18             | 0.39 | 0.01 | 0.11             | 0.18             | 0.39 |
| 300 | 6        | $t_3$ | 0 (65.05)                         | 45 (2.28)        | 60 (2.93)        | 63 (5.5)  | 135.98 | 1.97               | 2.4              | 6.19 | 0.03 | 0.48             | 0.68             | 0.74 | 0.03 | 0.48             | 0.68             | 0.74 |
| 300 | 8        | $t_3$ | 2 (60.44)                         | 73 (2.87)        | 74 (3.22)        | 57 (6.01) | 135.24 | 2.08               | 2.42             | 6.14 | 0.07 | 0.78             | 0.89             | 0.81 | 0.07 | 0.78             | 0.89             | 0.81 |
| 300 | 10       | $t_3$ | 0 (54.43)                         | 82 (2.95)        | 79 (3.25)        | 67 (5.31) | 134.33 | 2.09               | 2.4              | 6.1  | 0.15 | 0.88             | 0.96             | 0.89 | 0.15 | 0.88             | 0.96             | 0.89 |

**Table S11:**  $K = 3$  simulation results for moderate-dimensional settings ( $p = 100$ ) with equal cluster sizes ( $\pi_1, \pi_2, \pi_3 = 1/3, 1/3, 1/3$ ) and clusters arranged along a line. Each setting was replicated 100 times. For each setting, the number of replications detecting the correct number of clusters ( $|\hat{K} = 3|$ ), the mean number of significant clusters (mean  $\hat{K}$ ), median computing time, and mean adjusted Rand Index (ARI) are reported for pvcust AU  $p$ -values (pvAU), SHC<sub>L</sub>, SHC<sub>2</sub>, and BootClust (BC). Results for pvcust BP  $p$ -values are omitted since no significant clusters were identified across any settings. ( $N$ : sample size,  $\delta$ : separating signal between clusters,  $F$ : cluster distribution.)

| $N$ | $\delta$ | $F$   | parameters                        |                  |                  |          |        |                    |                  |       |      |                  | mean ARI         |    |      |                  |                  |      |
|-----|----------|-------|-----------------------------------|------------------|------------------|----------|--------|--------------------|------------------|-------|------|------------------|------------------|----|------|------------------|------------------|------|
|     |          |       | $ \hat{K} = 3 $ (mean $\hat{K}$ ) |                  |                  |          |        | median time (sec.) |                  |       |      |                  | mean ARI         |    |      |                  |                  |      |
|     |          |       | pvAU                              | SHC <sub>L</sub> | SHC <sub>2</sub> | BC       | pv     | SHC <sub>L</sub>   | SHC <sub>2</sub> | BC    | pvAU | SHC <sub>L</sub> | SHC <sub>2</sub> | BC | pvAU | SHC <sub>L</sub> | SHC <sub>2</sub> | BC   |
| 150 | 2        | Gaus. | 15 (5.26)                         | 0 (1)            | 0 (1)            | 0 (1)    | 64.72  | 1.74               | 2.01             | 11.8  | 0    | 0                | 0                | 0  | 0    | 0                | 0                | 0    |
| 150 | 4        | Gaus. | 4 (6.9)                           | 0 (1.39)         | 0 (1.59)         | 0 (2.35) | 66.76  | 1.92               | 3.22             | 13.52 | 0    | 0                | 0                | 0  | 0    | 0.18             | 0.27             | 0.04 |
| 150 | 6        | Gaus. | 2 (7.83)                          | 29 (1.68)        | 71 (2.48)        | 0 (4.78) | 64.24  | 2.57               | 3.95             | 13.88 | 0    | 0                | 0                | 0  | 0    | 0.33             | 0.68             | 0.16 |
| 150 | 8        | Gaus. | 2 (8.99)                          | 69 (2.38)        | 96 (2.92)        | 0 (8.47) | 66.66  | 3.43               | 4.27             | 15.52 | 0    | 0                | 0                | 0  | 0    | 0.68             | 0.95             | 0.34 |
| 150 | 10       | Gaus. | 5 (4.98)                          | 58 (2.16)        | 97 (2.94)        | 0 (9.46) | 68.9   | 3.21               | 4.05             | 17.53 | 0    | 0                | 0                | 0  | 0    | 0.58             | 0.97             | 0.39 |
| 150 | 2        | $t_6$ | 14 (5.07)                         | 0 (1.01)         | 0 (1.01)         | 0 (1.27) | 65.18  | 2.22               | 2.47             | 11.7  | 0    | 0                | 0                | 0  | 0    | 0                | 0                | 0    |
| 150 | 4        | $t_6$ | 6 (6.29)                          | 0 (1.26)         | 0 (1.4)          | 0 (1.72) | 61.71  | 1.85               | 2.62             | 11.07 | 0    | 0                | 0                | 0  | 0    | 0.12             | 0.17             | 0.02 |
| 150 | 6        | $t_6$ | 4 (7.38)                          | 5 (1.51)         | 5 (1.64)         | 0 (2.71) | 60.95  | 2.57               | 3.21             | 11.45 | 0    | 0                | 0                | 0  | 0    | 0.27             | 0.33             | 0.08 |
| 150 | 8        | $t_6$ | 3 (8.12)                          | 53 (2.07)        | 90 (2.8)         | 0 (7.48) | 68.01  | 3.06               | 4.01             | 15.55 | 0    | 0                | 0                | 0  | 0    | 0.51             | 0.85             | 0.34 |
| 150 | 10       | $t_6$ | 4 (8.59)                          | 63 (2.26)        | 95 (2.9)         | 0 (8.74) | 55.48  | 3.25               | 4.05             | 13.61 | 0    | 0                | 0                | 0  | 0    | 0.62             | 0.94             | 0.41 |
| 150 | 2        | $t_3$ | 7 (4.18)                          | 16 (1.82)        | 15 (1.83)        | 0 (7.93) | 69.83  | 3.37               | 3.81             | 24.69 | 0    | 0                | 0                | 0  | 0    | 0                | 0                | 0.01 |
| 150 | 4        | $t_3$ | 8 (6.06)                          | 9 (1.64)         | 8 (1.67)         | 0 (6.4)  | 70.22  | 2.6                | 3.55             | 22.44 | 0    | 0                | 0                | 0  | 0    | 0                | 0                | 0.16 |
| 150 | 6        | $t_3$ | 4 (7.12)                          | 5 (1.39)         | 9 (1.51)         | 0 (7.66) | 67.31  | 2.53               | 2.94             | 23.68 | 0    | 0                | 0                | 0  | 0    | 0.1              | 0.12             | 0.33 |
| 150 | 8        | $t_3$ | 4 (7.27)                          | 9 (1.48)         | 17 (1.88)        | 0 (8.47) | 72.23  | 2.22               | 3.31             | 26.22 | 0    | 0                | 0                | 0  | 0    | 0.18             | 0.32             | 0.56 |
| 150 | 10       | $t_3$ | 2 (7.96)                          | 19 (1.78)        | 41 (2.72)        | 0 (9.19) | 67.73  | 2.66               | 4.12             | 24.31 | 0    | 0                | 0                | 0  | 0    | 0.3              | 0.62             | 0.72 |
| 300 | 2        | Gaus. | 1 (11.35)                         | 0 (1.13)         | 0 (1.66)         | 0 (1.01) | 202.26 | 6.49               | 10.75            | 31.06 | 0    | 0                | 0                | 0  | 0    | 0.04             | 0.15             | 0    |
| 300 | 4        | Gaus. | 0 (14.8)                          | 34 (2.2)         | 85 (2.81)        | 0 (3.84) | 187.38 | 10.3               | 12.55            | 29.28 | 0    | 0                | 0                | 0  | 0    | 0.43             | 0.55             | 0.3  |
| 300 | 6        | Gaus. | 0 (17.18)                         | 99 (2.98)        | 100 (3)          | 0 (10)   | 185.83 | 13.9               | 15.07            | 35.72 | 0    | 0                | 0                | 0  | 0    | 0.92             | 0.92             | 0.39 |
| 300 | 8        | Gaus. | 0 (18.76)                         | 100 (3)          | 100 (3)          | 1 (9.93) | 187.76 | 12.02              | 13.13            | 35.79 | 0    | 0                | 0                | 0  | 0    | 0.99             | 0.99             | 0.41 |
| 300 | 10       | Gaus. | 0 (8.4)                           | 100 (3)          | 100 (3)          | 0 (10)   | 206.64 | 12.11              | 13.13            | 35.84 | 0    | 0                | 0                | 0  | 0    | 1                | 1                | 0.41 |
| 300 | 2        | $t_6$ | 0 (12.34)                         | 0 (1.02)         | 0 (1.03)         | 0 (1)    | 201.26 | 6.53               | 6.97             | 36.88 | 0    | 0                | 0                | 0  | 0    | 0                | 0                | 0    |
| 300 | 4        | $t_6$ | 0 (13.83)                         | 0 (1.62)         | 0 (1.68)         | 0 (1.94) | 197.22 | 10.05              | 10.79            | 35.75 | 0    | 0                | 0                | 0  | 0    | 0.25             | 0.27             | 0.25 |
| 300 | 6        | $t_6$ | 0 (17.13)                         | 85 (2.75)        | 91 (2.84)        | 1 (9.77) | 200.42 | 11.63              | 12.68            | 66.57 | 0    | 0                | 0                | 0  | 0    | 0.69             | 0.73             | 0.39 |
| 300 | 8        | $t_6$ | 0 (17.5)                          | 99 (2.98)        | 100 (3)          | 0 (10)   | 200.28 | 12.98              | 14.75            | 66.8  | 0    | 0                | 0                | 0  | 0    | 0.94             | 0.95             | 0.46 |
| 300 | 10       | $t_6$ | 0 (17.83)                         | 99 (2.98)        | 100 (3)          | 1 (9.93) | 177.04 | 14.32              | 16.94            | 35.01 | 0    | 0                | 0                | 0  | 0    | 0.98             | 0.99             | 0.46 |
| 300 | 2        | $t_3$ | 0 (9.88)                          | 27 (2.32)        | 27 (2.36)        | 0 (8.92) | 191.15 | 18.76              | 20.05            | 41.04 | 0    | 0                | 0                | 0  | 0    | 0                | 0                | 0.02 |
| 300 | 4        | $t_3$ | 0 (12.84)                         | 8 (1.91)         | 8 (1.96)         | 0 (9.37) | 193.62 | 11.92              | 12.06            | 42.83 | 0    | 0                | 0                | 0  | 0    | 0.06             | 0.06             | 0.25 |
| 300 | 6        | $t_3$ | 0 (14.72)                         | 21 (2.17)        | 29 (2.3)         | 0 (9.08) | 190.42 | 10.86              | 12.19            | 42.58 | 0    | 0                | 0                | 0  | 0    | 0.24             | 0.28             | 0.48 |
| 300 | 8        | $t_3$ | 0 (17.11)                         | 27 (3.25)        | 27 (3.64)        | 0 (9.91) | 217.02 | 12.81              | 14.82            | 46.09 | 0    | 0                | 0                | 0  | 0    | 0.55             | 0.63             | 0.72 |
| 300 | 10       | $t_3$ | 0 (18.59)                         | 31 (3.87)        | 30 (4.05)        | 0 (10)   | 199.92 | 17.57              | 19.12            | 63.58 | 0    | 0                | 0                | 0  | 0    | 0.85             | 0.88             | 0.84 |

**Table S12:**  $K = 3$  simulation results for high-dimensional settings ( $p = 1000$ ) with equal cluster sizes ( $\pi_1, \pi_2, \pi_3 = 1/3, 1/3, 1/3$ ) and clusters arranged along a line. Each setting was replicated 100 times. For each setting, the number of replications detecting the correct number of clusters ( $|\hat{K} = 3|$ ), the mean number of significant clusters (mean  $\hat{K}$ ), median computing time, and mean adjusted Rand Index (ARI) are reported for `pvcLust` AU  $p$ -values (`pvAU`), `SHCL`, `SHC2`, and `BootClust` (BC). Results for `pvcLust` BP  $p$ -values are omitted since no significant clusters were identified across any settings. `BootClust` results are not reported for the high-dimensional setting (-). ( $N$ : sample size,  $\delta$ : separating signal between clusters,  $F$ : cluster distribution.)

| parameters |          | $ \hat{K} = 3 $ (mean $\hat{K}$ ) |                   |                              |                              | median time (sec.) |                 |                              |                              | mean ARI |                   |                              |                              |    |
|------------|----------|-----------------------------------|-------------------|------------------------------|------------------------------|--------------------|-----------------|------------------------------|------------------------------|----------|-------------------|------------------------------|------------------------------|----|
| $N$        | $\delta$ | $F$                               | <code>pvAU</code> | <code>SHC<sub>L</sub></code> | <code>SHC<sub>2</sub></code> | BC                 | <code>pv</code> | <code>SHC<sub>L</sub></code> | <code>SHC<sub>2</sub></code> | BC       | <code>pvAU</code> | <code>SHC<sub>L</sub></code> | <code>SHC<sub>2</sub></code> | BC |
| 150        | 4        | Gaus.                             | 21 (3.36)         | 0 (1.01)                     | 0 (1.18)                     | -                  | 253.74          | 18.2                         | 20.73                        | -        | 0                 | 0.01                         | 0.07                         | -  |
| 150        | 8        | Gaus.                             | 10 (4.69)         | 7 (1.71)                     | 62 (2.37)                    | -                  | 207.16          | 27.13                        | 35.41                        | -        | 0                 | 0.36                         | 0.58                         | -  |
| 150        | 12       | Gaus.                             | 7 (6.25)          | 88 (2.76)                    | 97 (2.94)                    | -                  | 253.92          | 31.48                        | 36.01                        | -        | 0.02              | 0.87                         | 0.96                         | -  |
| 150        | 16       | Gaus.                             | 12 (3.93)         | 74 (2.48)                    | 99 (2.98)                    | -                  | 213.87          | 31.87                        | 36.63                        | -        | 0.35              | 0.74                         | 0.99                         | -  |
| 150        | 20       | Gaus.                             | 4 (2.58)          | 63 (2.26)                    | 94 (2.88)                    | -                  | 273.94          | 29.1                         | 35.01                        | -        | 0.5               | 0.63                         | 0.94                         | -  |
| 150        | 4        | $t_6$                             | 26 (3.09)         | 0 (1.01)                     | 0 (1.01)                     | -                  | 166.96          | 18.1                         | 20                           | -        | 0                 | 0                            | 0                            | -  |
| 150        | 8        | $t_6$                             | 22 (3.8)          | 0 (1.23)                     | 0 (1.3)                      | -                  | 165.05          | 23.27                        | 28.27                        | -        | 0                 | 0.12                         | 0.15                         | -  |
| 150        | 12       | $t_6$                             | 9 (5.21)          | 63 (2.3)                     | 76 (2.57)                    | -                  | 252.08          | 30.89                        | 36.51                        | -        | 0.01              | 0.62                         | 0.74                         | -  |
| 150        | 16       | $t_6$                             | 9 (6.09)          | 70 (2.4)                     | 84 (2.68)                    | -                  | 168.76          | 32.07                        | 36.2                         | -        | 0.01              | 0.7                          | 0.84                         | -  |
| 150        | 20       | $t_6$                             | 6 (3.48)          | 65 (2.3)                     | 90 (2.83)                    | -                  | 249.68          | 29.62                        | 36.8                         | -        | 0.4               | 0.65                         | 0.91                         | -  |
| 150        | 4        | $t_3$                             | 14 (2.04)         | 22 (2.24)                    | 19 (2.25)                    | -                  | 245.08          | 41.82                        | 39.35                        | -        | 0                 | 0                            | 0                            | -  |
| 150        | 8        | $t_3$                             | 19 (2.87)         | 14 (1.81)                    | 15 (1.85)                    | -                  | 237.56          | 31.02                        | 35.1                         | -        | 0                 | 0.01                         | 0.01                         | -  |
| 150        | 12       | $t_3$                             | 22 (3.47)         | 5 (1.44)                     | 7 (1.54)                     | -                  | 228.1           | 25.06                        | 28.55                        | -        | 0                 | 0.09                         | 0.13                         | -  |
| 150        | 16       | $t_3$                             | 14 (4.12)         | 20 (2)                       | 26 (2.28)                    | -                  | 217.58          | 27.96                        | 34.61                        | -        | 0.03              | 0.37                         | 0.46                         | -  |
| 150        | 20       | $t_3$                             | 11 (4.84)         | 53 (2.53)                    | 63 (2.97)                    | -                  | 225.43          | 31.25                        | 37.44                        | -        | 0.11              | 0.67                         | 0.83                         | -  |
| 300        | 4        | Gaus.                             | 3 (8)             | 0 (1.63)                     | 0 (1.69)                     | -                  | 871.51          | 91.24                        | 97.95                        | -        | 0                 | 0.21                         | 0.23                         | -  |
| 300        | 8        | Gaus.                             | 0 (10.13)         | 96 (2.93)                    | 96 (2.93)                    | -                  | 710.39          | 115.55                       | 124.68                       | -        | 0                 | 0.79                         | 0.79                         | -  |
| 300        | 12       | Gaus.                             | 1 (12.61)         | 100 (3)                      | 100 (3)                      | -                  | 796.69          | 118.11                       | 125.24                       | -        | 0.02              | 0.99                         | 0.99                         | -  |
| 300        | 16       | Gaus.                             | 0 (8)             | 100 (3)                      | 100 (3)                      | -                  | 765.97          | 161.54                       | 171.5                        | -        | 0.27              | 1                            | 1                            | -  |
| 300        | 20       | Gaus.                             | 5 (3.32)          | 100 (3)                      | 100 (3)                      | -                  | 769.39          | 145.15                       | 161.57                       | -        | 0.51              | 1                            | 1                            | -  |
| 300        | 4        | $t_6$                             | 1 (7.65)          | 0 (1.03)                     | 0 (1.01)                     | -                  | 837.69          | 71.6                         | 75.6                         | -        | 0                 | 0.01                         | 0                            | -  |
| 300        | 8        | $t_6$                             | 0 (8.84)          | 22 (2.1)                     | 21 (2.11)                    | -                  | 878.79          | 106.56                       | 114.31                       | -        | 0                 | 0.45                         | 0.46                         | -  |
| 300        | 12       | $t_6$                             | 1 (11.4)          | 100 (3)                      | 100 (3)                      | -                  | 762.92          | 113.31                       | 122.7                        | -        | 0.01              | 0.95                         | 0.95                         | -  |
| 300        | 16       | $t_6$                             | 0 (12.03)         | 99 (3.01)                    | 99 (3.01)                    | -                  | 603.21          | 134.31                       | 139.97                       | -        | 0.01              | 1                            | 1                            | -  |
| 300        | 20       | $t_6$                             | 1 (7.47)          | 99 (3.01)                    | 99 (3.01)                    | -                  | 658.54          | 117.83                       | 126.54                       | -        | 0.31              | 1                            | 1                            | -  |
| 300        | 4        | $t_3$                             | 6 (4.69)          | 17 (3.8)                     | 16 (3.8)                     | -                  | 662.47          | 248.46                       | 261.9                        | -        | 0                 | 0                            | 0                            | -  |
| 300        | 8        | $t_3$                             | 10 (5.77)         | 26 (3.09)                    | 29 (3.19)                    | -                  | 594.85          | 138.15                       | 162.77                       | -        | 0                 | 0.21                         | 0.22                         | -  |
| 300        | 12       | $t_3$                             | 3 (7.03)          | 28 (3.39)                    | 32 (3.49)                    | -                  | 752.2           | 140.12                       | 153.14                       | -        | 0                 | 0.47                         | 0.5                          | -  |
| 300        | 16       | $t_3$                             | 1 (7.67)          | 23 (4.36)                    | 22 (4.45)                    | -                  | 808.84          | 180.89                       | 192.34                       | -        | 0                 | 0.9                          | 0.9                          | -  |
| 300        | 20       | $t_3$                             | 2 (8.97)          | 21 (4.41)                    | 19 (4.5)                     | -                  | 719.21          | 176.14                       | 188.4                        | -        | 0.1               | 0.96                         | 0.96                         | -  |

**Table S13:**  $K = 3$  simulation results for low-dimensional settings ( $p = 10$ ) with equal cluster sizes ( $\pi_1, \pi_2, \pi_3 = 1/3, 1/3, 1/3$ ) and clusters arranged as a triangle. Each setting was replicated 100 times. For each setting, the number of replications detecting the correct number of clusters ( $\hat{K} = 3$ ), the mean number of significant clusters (mean  $\hat{K}$ ), median computing time, and mean adjusted Rand Index (ARI) are reported for pvclust AU  $p$ -values (pvAU), SHC<sub>L</sub>, SHC<sub>2</sub>, and BootClust (BC). Results for pvclust BP  $p$ -values are omitted since no significant clusters were identified across any settings. ( $N$ : sample size,  $\delta$ : separating signal between clusters,  $F$ : cluster distribution.)

| $N$ | $\delta$ | $F$   | $ \hat{K} = 3 $ (mean $\hat{K}$ ) |                  |                  |           |        |                  | median time (sec.) |      |      |                  |                  |      | mean ARI |                  |                  |
|-----|----------|-------|-----------------------------------|------------------|------------------|-----------|--------|------------------|--------------------|------|------|------------------|------------------|------|----------|------------------|------------------|
|     |          |       | pvAU                              | SHC <sub>L</sub> | SHC <sub>2</sub> | BC        | pv     | SHC <sub>L</sub> | SHC <sub>2</sub>   | BC   | pvAU | SHC <sub>L</sub> | SHC <sub>2</sub> | BC   | pvAU     | SHC <sub>L</sub> | SHC <sub>2</sub> |
| 150 | 2        | Gaus. | 0 (30.5)                          | 0 (1.07)         | 0 (1.13)         | 5 (1.15)  | 41.85  | 0.31             | 0.4                | 1.62 | 0.01 | 0.03             | 0.05             | 0.04 |          |                  |                  |
| 150 | 4        | Gaus. | 1 (29.17)                         | 21 (1.89)        | 36 (2.14)        | 41 (2.19) | 42.2   | 0.52             | 0.7                | 1.59 | 0.08 | 0.43             | 0.52             | 0.53 |          |                  |                  |
| 150 | 6        | Gaus. | 11 (16.19)                        | 71 (2.65)        | 81 (2.78)        | 79 (2.75) | 42.19  | 0.64             | 0.87               | 1.57 | 0.41 | 0.81             | 0.85             | 0.84 |          |                  |                  |
| 150 | 8        | Gaus. | 25 (10.17)                        | 89 (2.87)        | 94 (2.94)        | 90 (2.94) | 42.04  | 0.64             | 0.86               | 1.56 | 0.64 | 0.93             | 0.96             | 0.96 |          |                  |                  |
| 150 | 10       | Gaus. | 30 (6.65)                         | 89 (2.89)        | 91 (2.91)        | 90 (2.92) | 42.6   | 0.65             | 0.87               | 1.56 | 0.68 | 0.95             | 0.95             | 0.95 |          |                  |                  |
| 150 | 2        | $t_6$ | 0 (29.67)                         | 0 (1.02)         | 0 (1.02)         | 0 (1.18)  | 42.89  | 0.31             | 0.41               | 1.63 | 0.01 | 0                | 0                | 0    |          |                  |                  |
| 150 | 4        | $t_6$ | 0 (30.07)                         | 12 (1.75)        | 26 (1.97)        | 34 (2.12) | 42.34  | 0.51             | 0.68               | 1.61 | 0.06 | 0.36             | 0.43             | 0.47 |          |                  |                  |
| 150 | 6        | $t_6$ | 0 (23.87)                         | 57 (2.48)        | 68 (2.65)        | 69 (2.72) | 42.31  | 0.63             | 0.84               | 1.59 | 0.19 | 0.71             | 0.76             | 0.76 |          |                  |                  |
| 150 | 8        | $t_6$ | 11 (15.13)                        | 82 (2.8)         | 86 (2.86)        | 86 (2.94) | 42.06  | 0.64             | 0.86               | 1.58 | 0.43 | 0.88             | 0.9              | 0.9  |          |                  |                  |
| 150 | 10       | $t_6$ | 19 (10.19)                        | 90 (2.89)        | 93 (2.95)        | 94 (2.94) | 42.24  | 0.64             | 0.86               | 1.56 | 0.57 | 0.93             | 0.95             | 0.95 |          |                  |                  |
| 150 | 2        | $t_3$ | 0 (26.75)                         | 1 (1.13)         | 1 (1.13)         | 0 (3.25)  | 42.45  | 0.31             | 0.4                | 1.65 | 0.01 | 0                | 0                | 0.02 |          |                  |                  |
| 150 | 4        | $t_3$ | 0 (28.7)                          | 3 (1.29)         | 7 (1.45)         | 8 (5.36)  | 42.62  | 0.31             | 0.42               | 1.65 | 0.02 | 0.09             | 0.14             | 0.3  |          |                  |                  |
| 150 | 6        | $t_3$ | 1 (24.88)                         | 22 (1.95)        | 28 (2.25)        | 26 (4.97) | 43.06  | 0.52             | 0.69               | 1.65 | 0.11 | 0.41             | 0.47             | 0.53 |          |                  |                  |
| 150 | 8        | $t_3$ | 2 (22.69)                         | 48 (2.37)        | 55 (2.75)        | 55 (4.61) | 42.24  | 0.62             | 0.85               | 1.6  | 0.2  | 0.63             | 0.73             | 0.73 |          |                  |                  |
| 150 | 10       | $t_3$ | 7 (17.64)                         | 77 (2.79)        | 66 (3.04)        | 66 (4.97) | 42.44  | 0.64             | 0.86               | 1.58 | 0.38 | 0.83             | 0.85             | 0.82 |          |                  |                  |
| 300 | 2        | Gaus. | 0 (68.56)                         | 0 (1.16)         | 1 (1.2)          | 9 (1.38)  | 134.2  | 1.09             | 1.38               | 6.2  | 0.01 | 0.05             | 0.06             | 0.08 |          |                  |                  |
| 300 | 4        | Gaus. | 0 (64.76)                         | 54 (2.45)        | 61 (2.52)        | 62 (2.57) | 134.92 | 2                | 2.32               | 6.1  | 0.05 | 0.62             | 0.63             | 0.65 |          |                  |                  |
| 300 | 6        | Gaus. | 10 (31.91)                        | 90 (2.9)         | 91 (2.91)        | 91 (2.91) | 137.18 | 2.09             | 2.42               | 6.04 | 0.42 | 0.91             | 0.92             | 0.92 |          |                  |                  |
| 300 | 8        | Gaus. | 21 (21.41)                        | 95 (2.95)        | 98 (2.98)        | 96 (2.96) | 134.84 | 2.14             | 2.44               | 5.98 | 0.59 | 0.96             | 0.97             | 0.96 |          |                  |                  |
| 300 | 10       | Gaus. | 34 (16.93)                        | 97 (2.97)        | 97 (2.97)        | 97 (2.97) | 134.06 | 2.15             | 2.44               | 5.96 | 0.66 | 0.98             | 0.98             | 0.98 |          |                  |                  |
| 300 | 2        | $t_6$ | 0 (66.42)                         | 0 (1)            | 0 (1.02)         | 6 (1.25)  | 168.45 | 1.67             | 1.9                | 9.44 | 0    | 0                | 0                | 0.03 |          |                  |                  |
| 300 | 4        | $t_6$ | 0 (64.97)                         | 40 (2.19)        | 43 (2.27)        | 53 (2.47) | 134.69 | 2.46             | 2.84               | 8.05 | 0.02 | 0.48             | 0.5              | 0.55 |          |                  |                  |
| 300 | 6        | $t_6$ | 1 (54.11)                         | 72 (2.71)        | 78 (2.78)        | 81 (2.89) | 125.36 | 2.46             | 2.81               | 7.81 | 0.16 | 0.79             | 0.8              | 0.81 |          |                  |                  |
| 300 | 8        | $t_6$ | 7 (38.92)                         | 88 (2.87)        | 89 (2.89)        | 90 (2.9)  | 124.24 | 2.41             | 2.69               | 7.1  | 0.32 | 0.9              | 0.9              | 0.9  |          |                  |                  |
| 300 | 10       | $t_6$ | 26 (24.49)                        | 97 (2.97)        | 97 (2.97)        | 97 (2.97) | 119.19 | 2.36             | 2.62               | 6.99 | 0.53 | 0.95             | 0.95             | 0.95 |          |                  |                  |
| 300 | 2        | $t_3$ | 0 (57.68)                         | 3 (1.2)          | 3 (1.21)         | 0 (4.7)   | 136.38 | 1.09             | 1.4                | 6.33 | 0    | 0                | 0                | 0.04 |          |                  |                  |
| 300 | 4        | $t_3$ | 0 (62.81)                         | 8 (1.48)         | 10 (1.63)        | 16 (5.87) | 119.57 | 1.42             | 1.85               | 7.11 | 0.01 | 0.17             | 0.2              | 0.34 |          |                  |                  |
| 300 | 6        | $t_3$ | 0 (62.16)                         | 46 (2.55)        | 50 (2.73)        | 44 (5.88) | 120.84 | 1.94             | 2.31               | 5.14 | 0.03 | 0.59             | 0.62             | 0.65 |          |                  |                  |
| 300 | 8        | $t_3$ | 0 (57.29)                         | 60 (2.83)        | 57 (2.89)        | 52 (5.72) | 152.04 | 2.78             | 3.33               | 9.12 | 0.1  | 0.76             | 0.75             | 0.74 |          |                  |                  |
| 300 | 10       | $t_3$ | 5 (49.3)                          | 66 (3.03)        | 63 (3.22)        | 49 (6.09) | 135.73 | 2.09             | 2.45               | 6.13 | 0.22 | 0.84             | 0.85             | 0.78 |          |                  |                  |

**Table S14:**  $K = 3$  simulation results for moderate-dimensional settings ( $p = 100$ ) with equal cluster sizes ( $\pi_1, \pi_2, \pi_3 = 1/3, 1/3, 1/3$ ) and clusters arranged as a triangle. Each setting was replicated 100 times. For each setting, the number of replications detecting the correct number of clusters ( $|\hat{K} = 3|$ ), the mean number of significant clusters (mean  $\hat{K}$ ), median computing time, and mean adjusted Rand Index (ARI) are reported for pvcust AU  $p$ -values (pvAU), SHC<sub>L</sub>, SHC<sub>2</sub>, and BootClust (BC). Results for pvcust BP  $p$ -values are omitted since no significant clusters were identified across any settings. ( $N$ : sample size,  $\delta$ : separating signal between clusters,  $F$ : cluster distribution.)

| $N$ | $\delta$ | $F$   | parameters |                  |                  |          |        |                  |                  |       |       |                  | $ \hat{K} = 3 $ (mean $\hat{K}$ ) |      |      |                  |                  | median time (sec.) |      |                  |                  |      | mean ARI |  |  |  |  |
|-----|----------|-------|------------|------------------|------------------|----------|--------|------------------|------------------|-------|-------|------------------|-----------------------------------|------|------|------------------|------------------|--------------------|------|------------------|------------------|------|----------|--|--|--|--|
|     |          |       | pvAU       | SHC <sub>L</sub> | SHC <sub>2</sub> | BC       | pv     | SHC <sub>L</sub> | SHC <sub>2</sub> | BC    | pvAU  | SHC <sub>L</sub> | SHC <sub>2</sub>                  | BC   | pvAU | SHC <sub>L</sub> | SHC <sub>2</sub> | BC                 | pvAU | SHC <sub>L</sub> | SHC <sub>2</sub> | BC   |          |  |  |  |  |
| 150 | 2        | Gaus. | 20 (4.75)  | 0 (1.01)         | 0 (1.01)         | 0 (1.01) | 0 (1)  | 89.11            | 1.74             | 2.07  | 13.34 | 0                | 0                                 | 0    | 0    | 0                | 0                | 0                  | 0    | 0                | 0                | 0    |          |  |  |  |  |
| 150 | 4        | Gaus. | 11 (6.02)  | 5 (1.58)         | 3 (1.61)         | 0 (5.23) | 56.64  | 2.73             | 3.2              | 13.07 | 0     | 0.26             | 0.27                              | 0.13 | 0    | 0.26             | 0.27             | 0.13               | 0    | 0.26             | 0.27             | 0.13 |          |  |  |  |  |
| 150 | 6        | Gaus. | 3 (6.76)   | 44 (2.39)        | 46 (2.42)        | 0 (9.19) | 56.4   | 3.29             | 3.85             | 21.77 | 0.07  | 0.67             | 0.68                              | 0.32 | 0    | 0.67             | 0.68             | 0.32               | 0    | 0.67             | 0.68             | 0.32 |          |  |  |  |  |
| 150 | 8        | Gaus. | 6 (6.04)   | 59 (2.59)        | 62 (2.62)        | 0 (9.91) | 55.97  | 4.08             | 4.75             | 21.42 | 0.23  | 0.8              | 0.81                              | 0.38 | 0    | 0.8              | 0.81             | 0.38               | 0    | 0.8              | 0.81             | 0.38 |          |  |  |  |  |
| 150 | 10       | Gaus. | 18 (5.39)  | 81 (2.81)        | 84 (2.84)        | 0 (9.91) | 56.22  | 3.36             | 3.98             | 21.56 | 0.42  | 0.91             | 0.92                              | 0.39 | 0    | 0.91             | 0.92             | 0.39               | 0    | 0.91             | 0.92             | 0.39 |          |  |  |  |  |
| 150 | 2        | $t_6$ | 11 (5.75)  | 0 (1)            | 0 (1)            | 0 (1.09) | 57.02  | 2.3              | 2.65             | 8.99  | 0     | 0                | 0                                 | 0    | 0    | 0                | 0                | 0                  | 0    | 0                | 0                | 0    |          |  |  |  |  |
| 150 | 4        | $t_6$ | 9 (5.61)   | 0 (1.29)         | 0 (1.26)         | 0 (2.53) | 56.18  | 2.52             | 2.77             | 12.03 | 0     | 0.11             | 0.1                               | 0.05 | 0    | 0.11             | 0.1              | 0.05               | 0    | 0.11             | 0.1              | 0.05 |          |  |  |  |  |
| 150 | 6        | $t_6$ | 5 (6.58)   | 17 (2.06)        | 21 (2.09)        | 0 (7.75) | 55.07  | 2.84             | 3.39             | 21.37 | 0.01  | 0.5              | 0.51                              | 0.26 | 0    | 0.5              | 0.51             | 0.26               | 0    | 0.5              | 0.51             | 0.26 |          |  |  |  |  |
| 150 | 8        | $t_6$ | 4 (6.79)   | 53 (2.47)        | 53 (2.5)         | 0 (9.46) | 56.58  | 3.3              | 3.85             | 21.85 | 0.08  | 0.71             | 0.72                              | 0.4  | 0    | 0.71             | 0.72             | 0.4                | 0    | 0.71             | 0.72             | 0.4  |          |  |  |  |  |
| 150 | 10       | $t_6$ | 13 (6.7)   | 74 (2.74)        | 73 (2.73)        | 0 (9.91) | 56     | 3.52             | 3.97             | 21.97 | 0.21  | 0.86             | 0.85                              | 0.46 | 0    | 0.86             | 0.85             | 0.46               | 0    | 0.86             | 0.85             | 0.46 |          |  |  |  |  |
| 150 | 2        | $t_3$ | 5 (4.55)   | 13 (1.79)        | 17 (1.83)        | 0 (6.13) | 57.12  | 3.38             | 3.88             | 16.03 | 0     | 0                | 0                                 | 0.01 | 0    | 0                | 0                | 0                  | 0    | 0                | 0                | 0.01 |          |  |  |  |  |
| 150 | 4        | $t_3$ | 3 (4.79)   | 16 (1.89)        | 17 (1.91)        | 0 (6.4)  | 57.74  | 3.38             | 3.83             | 17.65 | 0     | 0                | 0                                 | 0.05 | 0    | 0                | 0                | 0                  | 0    | 0                | 0                | 0.05 |          |  |  |  |  |
| 150 | 6        | $t_3$ | 4 (6.3)    | 20 (1.83)        | 19 (1.9)         | 0 (8.38) | 68.6   | 3.13             | 3.89             | 24.8  | 0     | 0.15             | 0.15                              | 0.36 | 0    | 0.15             | 0.15             | 0.36               | 0    | 0.15             | 0.15             | 0.36 |          |  |  |  |  |
| 150 | 8        | $t_3$ | 2 (6.98)   | 31 (2.11)        | 36 (2.36)        | 0 (9.46) | 64.76  | 2.96             | 3.89             | 22.27 | 0.03  | 0.38             | 0.43                              | 0.57 | 0    | 0.38             | 0.43             | 0.57               | 0    | 0.38             | 0.43             | 0.57 |          |  |  |  |  |
| 150 | 10       | $t_3$ | 2 (7.18)   | 38 (2.54)        | 38 (2.74)        | 0 (9.73) | 88.06  | 3.37             | 4.04             | 29.48 | 0.05  | 0.57             | 0.59                              | 0.65 | 0    | 0.57             | 0.59             | 0.65               | 0    | 0.57             | 0.59             | 0.65 |          |  |  |  |  |
| 300 | 2        | Gaus. | 1 (11.3)   | 0 (1)            | 0 (1.07)         | 0 (1)    | 201.71 | 6.52             | 6.95             | 35.77 | 0     | 0                | 0                                 | 0    | 0    | 0                | 0                | 0                  | 0    | 0                | 0                | 0    |          |  |  |  |  |
| 300 | 4        | Gaus. | 0 (12.68)  | 28 (2.06)        | 57 (2.48)        | 0 (5.1)  | 195.56 | 11.92            | 16.7             | 39.62 | 0.01  | 0.39             | 0.45                              | 0.26 | 0    | 0.39             | 0.45             | 0.26               | 0    | 0.39             | 0.45             | 0.26 |          |  |  |  |  |
| 300 | 6        | Gaus. | 0 (15.52)  | 76 (2.76)        | 87 (2.87)        | 0 (8.22) | 203.48 | 12.03            | 13.11            | 35.67 | 0.01  | 0.8              | 0.81                              | 0.38 | 0    | 0.8              | 0.81             | 0.38               | 0    | 0.8              | 0.81             | 0.38 |          |  |  |  |  |
| 300 | 8        | Gaus. | 7 (12.67)  | 86 (2.86)        | 90 (2.9)         | 0 (9.27) | 252.56 | 13.92            | 14.99            | 45.22 | 0.24  | 0.9              | 0.9                               | 0.4  | 0    | 0.9              | 0.9              | 0.4                | 0    | 0.9              | 0.9              | 0.4  |          |  |  |  |  |
| 300 | 10       | Gaus. | 12 (10.49) | 92 (2.92)        | 96 (2.96)        | 0 (9.83) | 194.89 | 11.95            | 13               | 67.29 | 0.35  | 0.94             | 0.95                              | 0.4  | 0    | 0.94             | 0.95             | 0.4                | 0    | 0.94             | 0.95             | 0.4  |          |  |  |  |  |
| 300 | 2        | $t_6$ | 0 (12.03)  | 0 (1)            | 0 (1)            | 0 (1.18) | 277.79 | 6.46             | 6.81             | 38.38 | 0     | 0                | 0                                 | 0    | 0    | 0                | 0                | 0                  | 0    | 0                | 0                | 0    |          |  |  |  |  |
| 300 | 4        | $t_6$ | 0 (13.04)  | 11 (1.71)        | 12 (1.72)        | 0 (3.89) | 209.07 | 10.41            | 11.13            | 35.94 | 0     | 0.24             | 0.24                              | 0.16 | 0    | 0.24             | 0.24             | 0.16               | 0    | 0.24             | 0.24             | 0.16 |          |  |  |  |  |
| 300 | 6        | $t_6$ | 0 (14.83)  | 56 (2.54)        | 60 (2.59)        | 0 (7.17) | 226.37 | 11.61            | 12.76            | 45.31 | 0     | 0.63             | 0.64                              | 0.36 | 0    | 0.63             | 0.64             | 0.36               | 0    | 0.63             | 0.64             | 0.36 |          |  |  |  |  |
| 300 | 8        | $t_6$ | 0 (15.21)  | 78 (2.77)        | 77 (2.76)        | 0 (8.92) | 223.16 | 12               | 12.95            | 41.45 | 0.04  | 0.81             | 0.8                               | 0.4  | 0    | 0.81             | 0.8              | 0.4                | 0    | 0.81             | 0.8              | 0.4  |          |  |  |  |  |
| 300 | 10       | $t_6$ | 3 (13.92)  | 83 (2.85)        | 84 (2.86)        | 0 (9.1)  | 214.09 | 12.17            | 13.23            | 43.04 | 0.13  | 0.88             | 0.88                              | 0.44 | 0    | 0.88             | 0.88             | 0.44               | 0    | 0.88             | 0.88             | 0.44 |          |  |  |  |  |
| 300 | 2        | $t_3$ | 0 (9.34)   | 25 (2.42)        | 25 (2.42)        | 0 (9.01) | 199.65 | 18.81            | 20.04            | 42.67 | 0     | 0                | 0                                 | 0.01 | 0    | 0                | 0                | 0                  | 0    | 0                | 0                | 0.01 |          |  |  |  |  |
| 300 | 4        | $t_3$ | 0 (11.05)  | 30 (2.28)        | 32 (2.31)        | 0 (9.11) | 205.86 | 18.84            | 20.09            | 46.54 | 0     | 0.03             | 0.03                              | 0.13 | 0    | 0.03             | 0.03             | 0.13               | 0    | 0.03             | 0.03             | 0.13 |          |  |  |  |  |
| 300 | 6        | $t_3$ | 0 (14.19)  | 31 (2.86)        | 28 (3.05)        | 0 (9.22) | 196.78 | 14.81            | 16.55            | 51.73 | 0     | 0.28             | 0.29                              | 0.39 | 0    | 0.28             | 0.29             | 0.39               | 0    | 0.28             | 0.29             | 0.39 |          |  |  |  |  |
| 300 | 8        | $t_3$ | 0 (15.12)  | 32 (3.2)         | 31 (3.32)        | 1 (9.45) | 201.85 | 14.16            | 15.53            | 57.04 | 0.01  | 0.53             | 0.54                              | 0.6  | 0    | 0.53             | 0.54             | 0.6                | 0    | 0.53             | 0.54             | 0.6  |          |  |  |  |  |
| 300 | 10       | $t_3$ | 0 (16.51)  | 34 (3.49)        | 35 (3.67)        | 1 (9.93) | 199.2  | 13.91            | 15.28            | 61.51 | 0.02  | 0.73             | 0.73                              | 0.75 | 0    | 0.73             | 0.73             | 0.75               | 0    | 0.73             | 0.73             | 0.75 |          |  |  |  |  |

**Table S15:**  $K = 3$  simulation results for high-dimensional settings ( $p = 1000$ ) with equal cluster sizes ( $\pi_1, \pi_2, \pi_3 = 1/3, 1/3, 1/3$ ) and clusters arranged as a triangle. Each setting was replicated 100 times. For each setting, the number of replications detecting the correct number of clusters ( $|\hat{K} = 3|$ ), the mean number of significant clusters (mean  $\hat{K}$ ), median computing time, and mean adjusted Rand Index (ARI) are reported for `pvcLust` AU  $p$ -values (`pvAU`), `SHCL`, `SHC2`, and `BootClust` (BC). Results for `pvcLust` BP  $p$ -values are omitted since no significant clusters were identified across any settings. `BootClust` results are not reported for the high-dimensional setting (-). ( $N$ : sample size,  $\delta$ : separating signal between clusters,  $F$ : cluster distribution.)

| parameters |          | $ \hat{K} = 3 $ (mean $\hat{K}$ ) |                   |                              |                              | median time (sec.) |                 |                              |                              | mean ARI |                   |                              |                              |    |
|------------|----------|-----------------------------------|-------------------|------------------------------|------------------------------|--------------------|-----------------|------------------------------|------------------------------|----------|-------------------|------------------------------|------------------------------|----|
| $N$        | $\delta$ | $F$                               | <code>pvAU</code> | <code>SHC<sub>L</sub></code> | <code>SHC<sub>2</sub></code> | BC                 | <code>pv</code> | <code>SHC<sub>L</sub></code> | <code>SHC<sub>2</sub></code> | BC       | <code>pvAU</code> | <code>SHC<sub>L</sub></code> | <code>SHC<sub>2</sub></code> | BC |
| 150        | 4        | Gaus.                             | 19 (3.57)         | 0 (1.01)                     | 0 (1.02)                     | -                  | 221.07          | 20.65                        | 23.07                        | -        | 0                 | 0                            | 0.01                         | -  |
| 150        | 8        | Gaus.                             | 12 (4.32)         | 24 (2.09)                    | 45 (2.35)                    | -                  | 180.93          | 34.32                        | 42.07                        | -        | 0.01              | 0.53                         | 0.61                         | -  |
| 150        | 12       | Gaus.                             | 16 (4.72)         | 58 (2.56)                    | 73 (2.72)                    | -                  | 196.5           | 32.84                        | 36.96                        | -        | 0.14              | 0.79                         | 0.84                         | -  |
| 150        | 16       | Gaus.                             | 23 (4.4)          | 82 (2.81)                    | 90 (2.89)                    | -                  | 194.7           | 34.69                        | 38.96                        | -        | 0.38              | 0.91                         | 0.93                         | -  |
| 150        | 20       | Gaus.                             | 26 (3.96)         | 96 (2.96)                    | 97 (2.97)                    | -                  | 221.87          | 31.86                        | 36.35                        | -        | 0.48              | 0.98                         | 0.98                         | -  |
| 150        | 4        | $t_6$                             | 28 (3.16)         | 0 (1)                        | 0 (1)                        | -                  | 167.34          | 23.89                        | 26.58                        | -        | 0                 | 0                            | 0                            | -  |
| 150        | 8        | $t_6$                             | 24 (3.87)         | 4 (1.55)                     | 3 (1.54)                     | -                  | 165.14          | 25.98                        | 29                           | -        | 0                 | 0.26                         | 0.26                         | -  |
| 150        | 12       | $t_6$                             | 19 (4.41)         | 47 (2.39)                    | 49 (2.4)                     | -                  | 163.93          | 37.51                        | 42.22                        | -        | 0.01              | 0.69                         | 0.69                         | -  |
| 150        | 16       | $t_6$                             | 16 (4.56)         | 81 (2.8)                     | 81 (2.8)                     | -                  | 165.66          | 33.15                        | 36.96                        | -        | 0.17              | 0.89                         | 0.89                         | -  |
| 150        | 20       | $t_6$                             | 25 (3.86)         | 84 (2.84)                    | 85 (2.85)                    | -                  | 164.58          | 38.5                         | 43.38                        | -        | 0.36              | 0.92                         | 0.92                         | -  |
| 150        | 4        | $t_3$                             | 20 (2.06)         | 26 (2.19)                    | 27 (2.22)                    | -                  | 183.82          | 35.72                        | 39.5                         | -        | 0                 | 0                            | 0                            | -  |
| 150        | 8        | $t_3$                             | 16 (2.34)         | 22 (2.09)                    | 25 (2.11)                    | -                  | 171.07          | 35.54                        | 43.33                        | -        | 0                 | 0.01                         | 0.01                         | -  |
| 150        | 12       | $t_3$                             | 18 (3.3)          | 24 (2.33)                    | 23 (2.42)                    | -                  | 176.81          | 40.64                        | 47.66                        | -        | 0.03              | 0.2                          | 0.21                         | -  |
| 150        | 16       | $t_3$                             | 19 (3.76)         | 28 (2.44)                    | 32 (2.51)                    | -                  | 187.08          | 40.22                        | 45.36                        | -        | 0.03              | 0.5                          | 0.51                         | -  |
| 150        | 20       | $t_3$                             | 22 (3.8)          | 54 (2.89)                    | 50 (3.02)                    | -                  | 188.17          | 45.05                        | 51.34                        | -        | 0.18              | 0.75                         | 0.75                         | -  |
| 300        | 4        | Gaus.                             | 5 (7.21)          | 0 (1.09)                     | 0 (1.13)                     | -                  | 659.73          | 77.43                        | 89.06                        | -        | 0                 | 0.03                         | 0.04                         | -  |
| 300        | 8        | Gaus.                             | 2 (9.7)           | 49 (2.42)                    | 56 (2.48)                    | -                  | 657.83          | 110.35                       | 121.24                       | -        | 0.01              | 0.63                         | 0.64                         | -  |
| 300        | 12       | Gaus.                             | 2 (9.36)          | 89 (2.89)                    | 89 (2.89)                    | -                  | 658.55          | 137.89                       | 147.3                        | -        | 0.11              | 0.91                         | 0.91                         | -  |
| 300        | 16       | Gaus.                             | 8 (7.17)          | 94 (2.94)                    | 94 (2.94)                    | -                  | 658.07          | 124.99                       | 134.47                       | -        | 0.35              | 0.95                         | 0.95                         | -  |
| 300        | 20       | Gaus.                             | 13 (6.56)         | 92 (2.92)                    | 94 (2.94)                    | -                  | 696.86          | 113.87                       | 123.51                       | -        | 0.43              | 0.96                         | 0.97                         | -  |
| 300        | 4        | $t_6$                             | 6 (6.95)          | 0 (1)                        | 0 (1)                        | -                  | 587.49          | 90.89                        | 95.64                        | -        | 0                 | 0                            | 0                            | -  |
| 300        | 8        | $t_6$                             | 2 (8.13)          | 28 (2.09)                    | 28 (2.09)                    | -                  | 757.31          | 99.74                        | 108.53                       | -        | 0                 | 0.43                         | 0.43                         | -  |
| 300        | 12       | $t_6$                             | 1 (9.22)          | 74 (2.73)                    | 76 (2.75)                    | -                  | 802.25          | 155.95                       | 169.55                       | -        | 0.02              | 0.8                          | 0.8                          | -  |
| 300        | 16       | $t_6$                             | 1 (9.5)           | 88 (2.88)                    | 88 (2.88)                    | -                  | 755.59          | 117.67                       | 126.03                       | -        | 0.09              | 0.91                         | 0.91                         | -  |
| 300        | 20       | $t_6$                             | 15 (6.78)         | 99 (2.99)                    | 99 (2.99)                    | -                  | 795.03          | 148.68                       | 159.76                       | -        | 0.37              | 0.97                         | 0.97                         | -  |
| 300        | 4        | $t_3$                             | 4 (3.61)          | 33 (3.25)                    | 32 (3.24)                    | -                  | 790.72          | 272.77                       | 283.99                       | -        | 0                 | 0                            | 0                            | -  |
| 300        | 8        | $t_3$                             | 7 (4.79)          | 29 (3.41)                    | 27 (3.45)                    | -                  | 703.06          | 213.98                       | 246.24                       | -        | 0                 | 0.06                         | 0.06                         | -  |
| 300        | 12       | $t_3$                             | 6 (5.73)          | 27 (3.75)                    | 25 (3.85)                    | -                  | 793.85          | 191.86                       | 207.88                       | -        | 0                 | 0.37                         | 0.37                         | -  |
| 300        | 16       | $t_3$                             | 1 (7.32)          | 30 (4.03)                    | 29 (4.24)                    | -                  | 823.61          | 169.18                       | 181.83                       | -        | 0.02              | 0.69                         | 0.7                          | -  |
| 300        | 20       | $t_3$                             | 2 (7.57)          | 29 (4.21)                    | 21 (4.35)                    | -                  | 754.8           | 144.55                       | 164.02                       | -        | 0.08              | 0.82                         | 0.82                         | -  |

**Table S16:**  $K = 3$  simulation results with unequal cluster sizes ( $\pi_1, \pi_2, \pi_3 = 1/5, 2/5, 2/5$ ) and clusters arranged as a triangle. Each setting was replicated 100 times. For each setting, the number of replications detecting the correct number of clusters ( $\hat{K} = 3$ ), the mean number of significant clusters (mean  $\hat{K}$ ), median computing time, and mean adjusted Rand Index (ARI) are reported for pvclust AU  $p$ -values (pvAU), SHC<sub>L</sub>, and BootClust (BC). Results for pvclust BP  $p$ -values are omitted since no significant clusters were identified across any settings. BootClust results are not reported for the high-dimensional setting (–). ( $N$ : sample size,  $p$ : dimension,  $\delta$ : separating signal between clusters,  $F$ : cluster distribution.)

| $N$ | parameters |          |       | $ \hat{K} = 3 $ (mean $\hat{K}$ ) |                  |                  |           |        |                  |                  |       |      |                  | median time (sec.) |      |      |                  | mean ARI         |      |      |  |
|-----|------------|----------|-------|-----------------------------------|------------------|------------------|-----------|--------|------------------|------------------|-------|------|------------------|--------------------|------|------|------------------|------------------|------|------|--|
|     | $p$        | $\delta$ | $F$   | pvAU                              | SHC <sub>L</sub> | SHC <sub>2</sub> | BC        | pv     | SHC <sub>L</sub> | SHC <sub>2</sub> | BC    | pvAU | SHC <sub>L</sub> | SHC <sub>2</sub>   | BC   | pvAU | SHC <sub>L</sub> | SHC <sub>2</sub> | BC   |      |  |
|     |            |          |       |                                   |                  |                  |           |        |                  |                  |       |      |                  |                    |      |      |                  |                  |      |      |  |
| 150 | 10         | 2        | Gaus. | 0 (30.91)                         | 0 (1.06)         | 0 (1.08)         | 2 (1.09)  | 50.12  | 0.44             | 0.59             | 2.35  | 0.01 | 0.03             | 0.04               | 0.04 | 0.01 | 0.03             | 0.04             | 0.04 | 0.04 |  |
| 150 | 10         | 4        | Gaus. | 1 (28.93)                         | 12 (1.78)        | 26 (2.05)        | 34 (2.12) | 50.43  | 0.66             | 0.95             | 2.43  | 0.09 | 0.42             | 0.52               | 0.52 | 0.09 | 0.42             | 0.52             | 0.52 | 0.52 |  |
| 150 | 10         | 6        | Gaus. | 12 (15.78)                        | 60 (2.54)        | 73 (2.7)         | 74 (2.73) | 48.37  | 0.83             | 1.13             | 2.38  | 0.42 | 0.79             | 0.85               | 0.86 | 0.42 | 0.79             | 0.85             | 0.86 | 0.86 |  |
| 150 | 10         | 8        | Gaus. | 23 (9.98)                         | 86 (2.84)        | 90 (2.9)         | 89 (2.88) | 47.25  | 0.84             | 1.1              | 2.23  | 0.62 | 0.92             | 0.95               | 0.94 | 0.62 | 0.92             | 0.95             | 0.94 | 0.94 |  |
| 150 | 10         | 10       | Gaus. | 22 (7.41)                         | 90 (2.89)        | 94 (2.93)        | 96 (2.96) | 44.67  | 0.84             | 1.1              | 2.17  | 0.69 | 0.96             | 0.97               | 0.98 | 0.69 | 0.96             | 0.97             | 0.98 | 0.98 |  |
| 300 | 10         | 2        | Gaus. | 0 (67.61)                         | 1 (1.19)         | 2 (1.25)         | 8 (1.34)  | 165.51 | 1.63             | 1.89             | 9.05  | 0.01 | 0.08             | 0.1                | 0.12 | 0.01 | 0.08             | 0.1              | 0.12 | 0.12 |  |
| 300 | 10         | 4        | Gaus. | 0 (67.46)                         | 41 (2.28)        | 52 (2.42)        | 57 (2.56) | 166.74 | 2.52             | 3                | 8.92  | 0.02 | 0.6              | 0.63               | 0.67 | 0.02 | 0.6              | 0.63             | 0.67 | 0.67 |  |
| 300 | 10         | 6        | Gaus. | 9 (38.07)                         | 78 (2.78)        | 82 (2.82)        | 82 (2.84) | 166.8  | 2.73             | 3                | 8.97  | 0.38 | 0.88             | 0.89               | 0.89 | 0.38 | 0.88             | 0.89             | 0.89 | 0.89 |  |
| 300 | 10         | 8        | Gaus. | 21 (21.76)                        | 86 (2.85)        | 89 (2.89)        | 90 (2.9)  | 182.04 | 3                | 3.57             | 9.65  | 0.57 | 0.93             | 0.94               | 0.94 | 0.57 | 0.93             | 0.94             | 0.94 | 0.94 |  |
| 300 | 10         | 10       | Gaus. | 26 (10.9)                         | 99 (2.99)        | 99 (2.99)        | 98 (2.98) | 171.46 | 3                | 3.5              | 9.11  | 0.7  | 0.99             | 0.99               | 0.98 | 0.7  | 0.99             | 0.99             | 0.99 | 0.98 |  |
| 150 | 100        | 2        | Gaus. | 16 (5.09)                         | 0 (1.01)         | 0 (1.01)         | 0 (1)     | 61.89  | 1.85             | 2.07             | 10.3  | 0    | 0                | 0                  | 0    | 0    | 0                | 0                | 0    | 0    |  |
| 150 | 100        | 4        | Gaus. | 10 (5.8)                          | 7 (1.65)         | 5 (1.68)         | 0 (4.69)  | 71.57  | 2.74             | 3.18             | 15.04 | 0    | 0.32             | 0.33               | 0.1  | 0    | 0.32             | 0.33             | 0.1  | 0.1  |  |
| 150 | 100        | 6        | Gaus. | 2 (6.75)                          | 26 (2.17)        | 27 (2.2)         | 0 (8.65)  | 68.36  | 2.88             | 3.35             | 21.66 | 0.04 | 0.62             | 0.63               | 0.26 | 0.04 | 0.62             | 0.63             | 0.26 | 0.26 |  |
| 150 | 100        | 8        | Gaus. | 5 (6.53)                          | 64 (2.62)        | 70 (2.68)        | 0 (9.37)  | 71.4   | 3.26             | 3.8              | 18.42 | 0.2  | 0.82             | 0.84               | 0.32 | 0.2  | 0.82             | 0.84             | 0.32 | 0.32 |  |
| 150 | 100        | 10       | Gaus. | 9 (5.6)                           | 79 (2.78)        | 83 (2.82)        | 0 (9.91)  | 75.16  | 3.43             | 4.08             | 17.89 | 0.33 | 0.9              | 0.91               | 0.35 | 0.33 | 0.9              | 0.91             | 0.35 | 0.35 |  |
| 300 | 100        | 2        | Gaus. | 0 (12.56)                         | 0 (1.04)         | 0 (1.11)         | 0 (1)     | 244.17 | 6.59             | 7.27             | 39.89 | 0    | 0.01             | 0.03               | 0    | 0    | 0.01             | 0.03             | 0    | 0    |  |
| 300 | 100        | 4        | Gaus. | 0 (13.71)                         | 23 (2.04)        | 41 (2.35)        | 0 (3.92)  | 242.96 | 10.56            | 12.58            | 41.9  | 0    | 0.43             | 0.48               | 0.27 | 0    | 0.43             | 0.48             | 0.27 | 0.27 |  |
| 300 | 100        | 6        | Gaus. | 0 (14.76)                         | 78 (2.78)        | 91 (2.91)        | 0 (8.28)  | 242.52 | 11.77            | 13.02            | 49.08 | 0.03 | 0.82             | 0.84               | 0.36 | 0.03 | 0.82             | 0.84             | 0.36 | 0.36 |  |
| 300 | 100        | 8        | Gaus. | 2 (14.02)                         | 78 (2.78)        | 89 (2.89)        | 0 (8.7)   | 231.3  | 11.81            | 13.11            | 47.58 | 0.12 | 0.87             | 0.89               | 0.39 | 0.12 | 0.87             | 0.89             | 0.39 | 0.39 |  |
| 300 | 100        | 10       | Gaus. | 12 (10.03)                        | 95 (2.95)        | 97 (2.97)        | 0 (9.52)  | 238.64 | 13.25            | 14.31            | 55.36 | 0.4  | 0.96             | 0.97               | 0.39 | 0.4  | 0.96             | 0.97             | 0.39 | 0.39 |  |
| 150 | 1000       | 4        | Gaus. | 24 (3.36)                         | 0 (1.01)         | 0 (1.04)         | –         | 233.03 | 17.2             | 19.38            | –     | 0    | 0                | 0.02               | –    | 0    | 0                | 0.02             | –    | –    |  |
| 150 | 1000       | 8        | Gaus. | 20 (3.94)                         | 14 (1.83)        | 25 (2.07)        | –         | 228.16 | 27.73            | 34.31            | –     | 0.02 | 0.44             | 0.53               | –    | 0.02 | 0.44             | 0.53             | –    | –    |  |
| 150 | 1000       | 12       | Gaus. | 18 (4.34)                         | 63 (2.62)        | 75 (2.75)        | –         | 212.6  | 31.62            | 36.15            | –     | 0.06 | 0.84             | 0.87               | –    | 0.06 | 0.84             | 0.87             | –    | –    |  |
| 150 | 1000       | 16       | Gaus. | 17 (4.42)                         | 83 (2.82)        | 90 (2.9)         | –         | 214.99 | 30.08            | 35.23            | –     | 0.24 | 0.91             | 0.94               | –    | 0.24 | 0.91             | 0.94             | –    | –    |  |
| 150 | 1000       | 20       | Gaus. | 21 (3.75)                         | 90 (2.9)         | 95 (2.95)        | –         | 213.61 | 37.09            | 41.4             | –     | 0.45 | 0.97             | 0.98               | –    | 0.45 | 0.97             | 0.98             | –    | –    |  |
| 300 | 1000       | 4        | Gaus. | 4 (7.61)                          | 0 (1.09)         | 0 (1.1)          | –         | 669.75 | 71.95            | 75.21            | –     | 0    | 0.03             | 0.04               | –    | 0    | 0.03             | 0.04             | –    | –    |  |
| 300 | 1000       | 8        | Gaus. | 1 (9.18)                          | 39 (2.33)        | 45 (2.4)         | –         | 661.61 | 101.79           | 110.8            | –     | 0    | 0.63             | 0.64               | –    | 0    | 0.63             | 0.64             | –    | –    |  |
| 300 | 1000       | 12       | Gaus. | 3 (9.18)                          | 78 (2.77)        | 83 (2.82)        | –         | 865.78 | 127.34           | 133.58           | –     | 0.13 | 0.87             | 0.88               | –    | 0.13 | 0.87             | 0.88             | –    | –    |  |
| 300 | 1000       | 16       | Gaus. | 6 (8.05)                          | 95 (2.95)        | 96 (2.96)        | –         | 785.7  | 120.32           | 127.35           | –     | 0.32 | 0.97             | 0.97               | –    | 0.32 | 0.97             | 0.97             | –    | –    |  |
| 300 | 1000       | 20       | Gaus. | 20 (5.85)                         | 97 (2.97)        | 97 (2.97)        | –         | 843.61 | 112.5            | 122.43           | –     | 0.5  | 0.98             | 0.98               | –    | 0.5  | 0.98             | 0.98             | –    | –    |  |

**Table S17:**  $K = 3$  simulation results with unequal cluster sizes ( $\pi_1, \pi_2, \pi_3 = 1/5, 1/5, 3/5$ ) and clusters arranged as a triangle. Each setting was replicated 100 times. For each setting, the number of replications detecting the correct number of clusters ( $\hat{K} = 3$ ), the mean number of significant clusters (mean  $\hat{K}$ ), median computing time, and mean adjusted Rand Index (ARI) are reported for pvclust AU  $p$ -values (pvAU), SHC<sub>L</sub>, and BootClust (BC). Results for pvclust BP  $p$ -values are omitted since no significant clusters were identified across any settings. BootClust results are not reported for the high-dimensional setting (-). ( $N$ : sample size,  $p$ : dimension,  $\delta$ : separating signal between clusters,  $F$ : cluster distribution.)

| $N$ | parameters |          |       | $ \hat{K} = 3 $ (mean $\hat{K}$ ) |                  |                  |           |        |                  |                  |       |      |                  | median time (sec.) |      |      | mean ARI         |                  |      |
|-----|------------|----------|-------|-----------------------------------|------------------|------------------|-----------|--------|------------------|------------------|-------|------|------------------|--------------------|------|------|------------------|------------------|------|
|     | $p$        | $\delta$ | $F$   | pvAU                              | SHC <sub>L</sub> | SHC <sub>2</sub> | BC        | pv     | SHC <sub>L</sub> | SHC <sub>2</sub> | BC    | pvAU | SHC <sub>L</sub> | SHC <sub>2</sub>   | BC   | pvAU | SHC <sub>L</sub> | SHC <sub>2</sub> | BC   |
| 150 | 10         | 2        | Gaus. | 0 (31.14)                         | 0 (1.02)         | 0 (1.03)         | 0 (1.02)  | 51.71  | 0.45             | 0.57             | 2.46  | 0.01 | 0.01             | 0.02               | 0.01 | 0.01 | 0.02             | 0.02             | 0.01 |
| 150 | 10         | 4        | Gaus. | 0 (28.24)                         | 4 (1.69)         | 17 (1.92)        | 18 (1.93) | 48.6   | 0.63             | 0.85             | 2.28  | 0.09 | 0.44             | 0.52               | 0.52 | 0.09 | 0.44             | 0.52             | 0.52 |
| 150 | 10         | 6        | Gaus. | 14 (14.9)                         | 42 (2.38)        | 71 (2.69)        | 65 (2.64) | 47.48  | 0.76             | 1.08             | 2.29  | 0.47 | 0.8              | 0.87               | 0.87 | 0.47 | 0.8              | 0.87             | 0.86 |
| 150 | 10         | 8        | Gaus. | 23 (8.48)                         | 68 (2.65)        | 83 (2.8)         | 85 (2.85) | 53.27  | 0.84             | 1.25             | 2.4   | 0.65 | 0.89             | 0.91               | 0.93 | 0.65 | 0.89             | 0.91             | 0.93 |
| 150 | 10         | 10       | Gaus. | 23 (8.36)                         | 75 (2.69)        | 92 (2.91)        | 89 (2.88) | 55.54  | 0.93             | 1.29             | 2.5   | 0.65 | 0.89             | 0.95               | 0.95 | 0.65 | 0.89             | 0.95             | 0.95 |
| 300 | 10         | 2        | Gaus. | 0 (69.01)                         | 0 (1.09)         | 0 (1.11)         | 5 (1.19)  | 164.95 | 1.74             | 1.95             | 10.01 | 0    | 0.04             | 0.05               | 0.06 | 0    | 0.04             | 0.05             | 0.06 |
| 300 | 10         | 4        | Gaus. | 0 (64.1)                          | 43 (2.27)        | 53 (2.4)         | 61 (2.59) | 161.21 | 2.61             | 2.92             | 8.22  | 0.06 | 0.64             | 0.68               | 0.72 | 0.06 | 0.64             | 0.68             | 0.72 |
| 300 | 10         | 6        | Gaus. | 5 (38.85)                         | 78 (2.77)        | 84 (2.83)        | 80 (2.81) | 163.35 | 2.85             | 3.27             | 8.44  | 0.36 | 0.87             | 0.88               | 0.87 | 0.36 | 0.87             | 0.88             | 0.87 |
| 300 | 10         | 8        | Gaus. | 18 (22.37)                        | 90 (2.9)         | 93 (2.93)        | 91 (2.91) | 168.16 | 3.04             | 3.64             | 9.28  | 0.59 | 0.96             | 0.96               | 0.96 | 0.59 | 0.96             | 0.96             | 0.96 |
| 300 | 10         | 10       | Gaus. | 27 (9.54)                         | 97 (2.96)        | 99 (2.99)        | 99 (2.99) | 175.66 | 2.88             | 3.4              | 9.07  | 0.77 | 0.98             | 0.99               | 0.99 | 0.77 | 0.98             | 0.99             | 0.99 |
| 150 | 100        | 2        | Gaus. | 7 (5.67)                          | 0 (1)            | 0 (1)            | 0 (1)     | 69.65  | 2.35             | 2.61             | 11.41 | 0    | 0                | 0                  | 0    | 0    | 0                | 0                | 0    |
| 150 | 100        | 4        | Gaus. | 14 (5.41)                         | 1 (1.61)         | 1 (1.67)         | 0 (4.15)  | 68.92  | 2.76             | 3.29             | 14.82 | 0    | 0.34             | 0.36               | 0.07 | 0    | 0.34             | 0.36             | 0.07 |
| 150 | 100        | 6        | Gaus. | 7 (6.49)                          | 33 (2.27)        | 41 (2.37)        | 0 (8.74)  | 69.44  | 3.72             | 4.47             | 18.33 | 0.08 | 0.71             | 0.73               | 0.21 | 0.08 | 0.71             | 0.73             | 0.21 |
| 150 | 100        | 8        | Gaus. | 4 (5.86)                          | 59 (2.57)        | 69 (2.67)        | 0 (9.64)  | 66.55  | 4.1              | 4.92             | 22.91 | 0.21 | 0.86             | 0.87               | 0.25 | 0.21 | 0.86             | 0.87             | 0.25 |
| 150 | 100        | 10       | Gaus. | 20 (5.08)                         | 71 (2.7)         | 83 (2.83)        | 0 (9.73)  | 71.27  | 3.12             | 4.18             | 18.58 | 0.36 | 0.9              | 0.92               | 0.26 | 0.36 | 0.9              | 0.92             | 0.26 |
| 300 | 100        | 2        | Gaus. | 0 (11.88)                         | 0 (1.02)         | 0 (1.09)         | 0 (1.09)  | 237.46 | 6.65             | 8                | 41.46 | 0    | 0.01             | 0.02               | 0    | 0    | 0.01             | 0.02             | 0    |
| 300 | 100        | 4        | Gaus. | 0 (13.66)                         | 16 (1.95)        | 28 (2.2)         | 0 (5.45)  | 234.95 | 10.69            | 12.03            | 43.22 | 0    | 0.45             | 0.5                | 0.23 | 0    | 0.45             | 0.5              | 0.23 |
| 300 | 100        | 6        | Gaus. | 0 (14.41)                         | 61 (2.61)        | 66 (2.66)        | 0 (8.38)  | 242.7  | 13.73            | 15               | 52.71 | 0.03 | 0.8              | 0.81               | 0.32 | 0.03 | 0.8              | 0.81             | 0.32 |
| 300 | 100        | 8        | Gaus. | 4 (12.27)                         | 80 (2.79)        | 83 (2.83)        | 0 (9.11)  | 238.55 | 14.62            | 16.08            | 47.28 | 0.2  | 0.89             | 0.9                | 0.32 | 0.2  | 0.89             | 0.9              | 0.32 |
| 300 | 100        | 10       | Gaus. | 11 (9.82)                         | 89 (2.89)        | 92 (2.92)        | 0 (9.68)  | 227.12 | 16.12            | 17.1             | 53.54 | 0.35 | 0.93             | 0.94               | 0.3  | 0.35 | 0.93             | 0.94             | 0.3  |
| 150 | 1000       | 4        | Gaus. | 19 (3.51)                         | 0 (1.01)         | 0 (1.02)         | -         | 166.44 | 18.42            | 20.17            | -     | 0    | 0.01             | 0.01               | -    | 0    | 0.01             | 0.01             | -    |
| 150 | 1000       | 8        | Gaus. | 6 (4.21)                          | 9 (1.77)         | 18 (2)           | -         | 165.09 | 26.6             | 31.24            | -     | 0    | 0.47             | 0.56               | -    | 0    | 0.47             | 0.56             | -    |
| 150 | 1000       | 12       | Gaus. | 20 (4.62)                         | 58 (2.53)        | 68 (2.66)        | -         | 165.73 | 35.37            | 40.05            | -     | 0.12 | 0.83             | 0.86               | -    | 0.12 | 0.83             | 0.86             | -    |
| 150 | 1000       | 16       | Gaus. | 20 (3.87)                         | 77 (2.75)        | 91 (2.9)         | -         | 166.22 | 33.06            | 37.86            | -     | 0.27 | 0.93             | 0.96               | -    | 0.27 | 0.93             | 0.96             | -    |
| 150 | 1000       | 20       | Gaus. | 18 (3.6)                          | 86 (2.86)        | 89 (2.89)        | -         | 165.16 | 36.72            | 40.76            | -     | 0.49 | 0.95             | 0.96               | -    | 0.49 | 0.95             | 0.96             | -    |
| 300 | 1000       | 4        | Gaus. | 3 (7.1)                           | 0 (1.13)         | 0 (1.15)         | -         | 673.4  | 94.01            | 98.73            | -     | 0    | 0.06             | 0.07               | -    | 0    | 0.06             | 0.07             | -    |
| 300 | 1000       | 8        | Gaus. | 4 (8.89)                          | 31 (2.23)        | 34 (2.27)        | -         | 891.79 | 145.25           | 154.96           | -     | 0    | 0.62             | 0.62               | -    | 0    | 0.62             | 0.62             | -    |
| 300 | 1000       | 12       | Gaus. | 3 (9.78)                          | 80 (2.8)         | 81 (2.81)        | -         | 663.69 | 136.83           | 145.92           | -     | 0.07 | 0.88             | 0.89               | -    | 0.07 | 0.88             | 0.89             | -    |
| 300 | 1000       | 16       | Gaus. | 9 (6.93)                          | 92 (2.91)        | 93 (2.92)        | -         | 660.42 | 126.95           | 136.8            | -     | 0.33 | 0.96             | 0.96               | -    | 0.33 | 0.96             | 0.96             | -    |
| 300 | 1000       | 20       | Gaus. | 13 (6.22)                         | 94 (2.94)        | 95 (2.95)        | -         | 666.59 | 136.72           | 145.78           | -     | 0.45 | 0.97             | 0.97               | -    | 0.45 | 0.97             | 0.97             | -    |



**Table S18:**  $K = 4$  simulation results for low-dimensional settings ( $p = 10$ ) with equal sized clusters arranged as a tetrahedron. Each setting was replicated 100 times. For each setting, the number of replications detecting the correct number of clusters ( $|\hat{K} = 4|$ ), the mean number of significant clusters (mean  $\hat{K}$ ), median computing time, and mean adjusted Rand Index (ARI) are reported for pvclust AU  $p$ -values (pvAU), SHC<sub>L</sub>, SHC<sub>2</sub>, and BootClust (BC). Results for pvclust BP  $p$ -values are omitted since no significant clusters were identified across any settings. ( $N$ : sample size,  $\delta$ : separating signal between clusters,  $F$ : cluster distribution.)

| N   | $\delta$ | F     | $\hat{K} = 4$   (mean $\hat{K}$ ) |                  |                  |           | median time (sec.) |                  |                  |       | mean ARI |                  |                  |      |
|-----|----------|-------|-----------------------------------|------------------|------------------|-----------|--------------------|------------------|------------------|-------|----------|------------------|------------------|------|
|     |          |       | pvAU                              | SHC <sub>L</sub> | SHC <sub>2</sub> | BC        | pv                 | SHC <sub>L</sub> | SHC <sub>2</sub> | BC    | pvAU     | SHC <sub>L</sub> | SHC <sub>2</sub> | BC   |
| 200 | 2        | Gaus. | 0 (42.78)                         | 0 (1.04)         | 0 (1.04)         | 3 (1.32)  | 62.79              | 0.59             | 0.7              | 3.26  | 0.01     | 0.01             | 0.01             | 0.05 |
| 200 | 4        | Gaus. | 0 (37.3)                          | 8 (2.19)         | 20 (2.63)        | 34 (3.09) | 67.86              | 0.87             | 1.24             | 2.73  | 0.11     | 0.39             | 0.5              | 0.6  |
| 200 | 6        | Gaus. | 7 (16.73)                         | 55 (3.39)        | 72 (3.63)        | 72 (3.69) | 67.75              | 1.08             | 1.48             | 2.68  | 0.45     | 0.79             | 0.85             | 0.87 |
| 200 | 8        | Gaus. | 14 (8.18)                         | 75 (3.7)         | 88 (3.88)        | 84 (3.84) | 68.11              | 1.17             | 1.5              | 2.67  | 0.6      | 0.9              | 0.95             | 0.94 |
| 200 | 10       | Gaus. | 21 (5.39)                         | 92 (3.88)        | 94 (3.94)        | 93 (3.93) | 67.66              | 1.17             | 1.5              | 2.67  | 0.67     | 0.96             | 0.98             | 0.97 |
| 200 | 2        | $t_6$ | 0 (40.91)                         | 0 (1)            | 0 (1)            | 0 (1.13)  | 71.47              | 0.52             | 0.65             | 2.81  | 0.01     | 0                | 0                | 0.01 |
| 200 | 4        | $t_6$ | 0 (39.75)                         | 1 (1.82)         | 10 (2.13)        | 19 (2.82) | 67.78              | 0.85             | 1.05             | 2.76  | 0.05     | 0.26             | 0.33             | 0.44 |
| 200 | 6        | $t_6$ | 1 (32.03)                         | 30 (2.95)        | 51 (3.3)         | 57 (3.51) | 68.06              | 1.05             | 1.35             | 2.72  | 0.22     | 0.64             | 0.72             | 0.74 |
| 200 | 8        | $t_6$ | 3 (14.86)                         | 63 (3.47)        | 79 (3.74)        | 77 (3.75) | 64.43              | 1.32             | 1.68             | 3.42  | 0.45     | 0.81             | 0.88             | 0.89 |
| 200 | 10       | $t_6$ | 13 (9.85)                         | 79 (3.73)        | 89 (3.9)         | 92 (3.99) | 71.37              | 1.21             | 1.66             | 2.7   | 0.59     | 0.9              | 0.95             | 0.95 |
| 200 | 2        | $t_3$ | 0 (36.63)                         | 0 (1.14)         | 0 (1.16)         | 0 (3.52)  | 68.54              | 0.51             | 0.62             | 2.84  | 0.01     | 0                | 0                | 0.02 |
| 200 | 4        | $t_3$ | 0 (38.41)                         | 0 (1.34)         | 0 (1.47)         | 2 (5.76)  | 68.33              | 0.67             | 0.78             | 2.82  | 0.02     | 0.06             | 0.1              | 0.29 |
| 200 | 6        | $t_3$ | 0 (37.14)                         | 5 (2.2)          | 19 (2.6)         | 16 (6.29) | 68.91              | 0.93             | 1.2              | 2.79  | 0.1      | 0.35             | 0.43             | 0.61 |
| 200 | 8        | $t_3$ | 0 (28.4)                          | 31 (2.98)        | 42 (3.43)        | 46 (6.04) | 68.5               | 1.07             | 1.46             | 2.74  | 0.24     | 0.61             | 0.69             | 0.77 |
| 200 | 10       | $t_3$ | 3 (21.12)                         | 60 (3.54)        | 70 (4.01)        | 55 (6.14) | 68.88              | 1.19             | 1.58             | 2.74  | 0.38     | 0.79             | 0.88             | 0.86 |
| 400 | 2        | Gaus. | 0 (95.23)                         | 0 (1.17)         | 0 (1.21)         | 3 (1.9)   | 224.71             | 2.79             | 3.15             | 13    | 0.01     | 0.04             | 0.04             | 0.11 |
| 400 | 4        | Gaus. | 0 (90.11)                         | 38 (3.06)        | 45 (3.18)        | 45 (3.29) | 224.38             | 3.6              | 3.98             | 10.88 | 0.05     | 0.6              | 0.62             | 0.64 |
| 400 | 6        | Gaus. | 5 (44.72)                         | 80 (3.79)        | 82 (3.81)        | 82 (3.81) | 227.64             | 3.99             | 4.44             | 10.71 | 0.34     | 0.88             | 0.89             | 0.89 |
| 400 | 8        | Gaus. | 9 (15.96)                         | 91 (3.87)        | 92 (3.9)         | 92 (3.92) | 233.6              | 4.07             | 4.5              | 10.61 | 0.55     | 0.94             | 0.95             | 0.96 |
| 400 | 10       | Gaus. | 26 (10.05)                        | 95 (3.95)        | 98 (3.98)        | 97 (3.97) | 202.74             | 4.52             | 4.94             | 12.53 | 0.7      | 0.98             | 0.99             | 0.98 |
| 400 | 2        | $t_6$ | 0 (91.25)                         | 0 (1.03)         | 0 (1.04)         | 4 (1.45)  | 226.26             | 2.05             | 2.23             | 11.18 | 0.01     | 0                | 0.01             | 0.04 |
| 400 | 4        | $t_6$ | 0 (91.94)                         | 18 (2.53)        | 28 (2.79)        | 34 (3.22) | 226.15             | 3.31             | 3.84             | 11.03 | 0.01     | 0.4              | 0.45             | 0.51 |
| 400 | 6        | $t_6$ | 0 (70.74)                         | 60 (3.47)        | 67 (3.66)        | 72 (3.84) | 233.42             | 3.84             | 4.35             | 10.82 | 0.15     | 0.75             | 0.79             | 0.8  |
| 400 | 8        | $t_6$ | 4 (39.28)                         | 88 (3.84)        | 89 (3.89)        | 93 (3.99) | 203.3              | 4.47             | 4.91             | 12.59 | 0.38     | 0.91             | 0.92             | 0.93 |
| 400 | 10       | $t_6$ | 10 (24.48)                        | 93 (3.9)         | 98 (3.98)        | 98 (3.98) | 229.91             | 3.98             | 4.48             | 10.7  | 0.53     | 0.95             | 0.97             | 0.97 |
| 400 | 2        | $t_3$ | 0 (84.43)                         | 0 (1.12)         | 0 (1.12)         | 0 (5.81)  | 227.01             | 2.05             | 2.25             | 11.35 | 0        | 0                | 0                | 0.04 |
| 400 | 4        | $t_3$ | 0 (89.68)                         | 2 (1.68)         | 3 (1.85)         | 7 (6.67)  | 226.48             | 2.53             | 3.3              | 11.22 | 0.01     | 0.15             | 0.17             | 0.35 |
| 400 | 6        | $t_3$ | 0 (89.74)                         | 32 (3.03)        | 31 (3.3)         | 25 (6.94) | 203.75             | 4.28             | 4.81             | 12.96 | 0.02     | 0.5              | 0.53             | 0.61 |
| 400 | 8        | $t_3$ | 0 (79.62)                         | 57 (3.72)        | 56 (3.91)        | 39 (7.36) | 230.28             | 3.88             | 4.32             | 10.97 | 0.1      | 0.77             | 0.78             | 0.79 |
| 400 | 10       | $t_3$ | 2 (63.1)                          | 66 (3.93)        | 65 (4.13)        | 43 (6.93) | 229.28             | 3.93             | 4.41             | 10.85 | 0.24     | 0.86             | 0.87             | 0.85 |

**Table S19:**  $K = 4$  simulation results for moderate-dimensional settings ( $p = 100$ ) with equal sized clusters arranged as a tetrahedron. Each setting was replicated 100 times. For each setting, the number of replications detecting the correct number of clusters ( $|\hat{K} = 4|$ ), the mean number of significant clusters (mean  $\hat{K}$ ), median computing time, and mean adjusted Rand Index (ARI) are reported for pvclust AU  $p$ -values (pvAU), SHC<sub>L</sub>, SHC<sub>2</sub>, and BootClust (BC). Results for pvclust BP  $p$ -values are omitted since no significant clusters were identified across any settings. ( $N$ : sample size,  $\delta$ : separating signal between clusters,  $F$ : cluster distribution.)

| parameters |          | $ \hat{K} = 4 $ (mean $\hat{K}$ ) |           |                  |                  |          |        | median time (sec.) |                  |        |      |                  |                  | mean ARI |      |                  |                  |      |  |
|------------|----------|-----------------------------------|-----------|------------------|------------------|----------|--------|--------------------|------------------|--------|------|------------------|------------------|----------|------|------------------|------------------|------|--|
| $N$        | $\delta$ | $F$                               | pvAU      | SHC <sub>L</sub> | SHC <sub>2</sub> | BC       | pv     | SHC <sub>L</sub>   | SHC <sub>2</sub> | BC     | pvAU | SHC <sub>L</sub> | SHC <sub>2</sub> | BC       | pvAU | SHC <sub>L</sub> | SHC <sub>2</sub> | BC   |  |
| 200        | 2        | Gaus.                             | 5 (7.45)  | 0 (1)            | 0 (1.03)         | 0 (1)    | 115.86 | 2.96               | 3.25             | 21.03  | 0    | 0                | 0                | 0.01     | 0    | 0.24             | 0.31             | 0    |  |
| 200        | 4        | Gaus.                             | 7 (8.54)  | 1 (1.83)         | 2 (2.16)         | 0 (6.85) | 111.83 | 4.75               | 5.74             | 24.01  | 0    | 0                | 0                | 0.24     | 0    | 0.63             | 0.65             | 0.46 |  |
| 200        | 6        | Gaus.                             | 4 (9.65)  | 20 (2.94)        | 27 (3.05)        | 0 (9.82) | 103.58 | 5.93               | 6.84             | 22.45  | 0.04 | 0.04             | 0.04             | 0.63     | 0.04 | 0.85             | 0.87             | 0.52 |  |
| 200        | 8        | Gaus.                             | 4 (9.25)  | 62 (3.58)        | 67 (3.65)        | 0 (10)   | 113.61 | 6.51               | 7.24             | 25.64  | 0.2  | 0.2              | 0.2              | 0.85     | 0.2  | 0.92             | 0.94             | 0.54 |  |
| 200        | 10       | Gaus.                             | 11 (6.7)  | 80 (3.78)        | 87 (3.87)        | 0 (10)   | 109.51 | 6.43               | 7.25             | 23.91  | 0.46 | 0.46             | 0.46             | 0.92     | 0.46 | 0.94             | 0.94             | 0.54 |  |
| 200        | 2        | $t_6$                             | 9 (7.56)  | 0 (1.02)         | 0 (1.02)         | 0 (1)    | 92.64  | 3.05               | 3.37             | 18.33  | 0    | 0                | 0                | 0        | 0    | 0                | 0                | 0    |  |
| 200        | 4        | $t_6$                             | 7 (7.92)  | 0 (1.24)         | 0 (1.24)         | 0 (4.15) | 93.56  | 3.09               | 3.38             | 19.17  | 0    | 0                | 0                | 0.06     | 0    | 0.06             | 0.06             | 0.1  |  |
| 200        | 6        | $t_6$                             | 1 (9.75)  | 7 (2.47)         | 10 (2.62)        | 0 (9.37) | 95.12  | 5.7                | 6.55             | 34.29  | 0.01 | 0.01             | 0.01             | 0.44     | 0.01 | 0.44             | 0.47             | 0.43 |  |
| 200        | 8        | $t_6$                             | 0 (9.79)  | 38 (3.22)        | 44 (3.29)        | 0 (9.91) | 94.41  | 6.06               | 6.96             | 34.74  | 0.06 | 0.06             | 0.06             | 0.73     | 0.06 | 0.73             | 0.75             | 0.53 |  |
| 200        | 10       | $t_6$                             | 7 (8.42)  | 61 (3.56)        | 68 (3.66)        | 0 (10)   | 91.66  | 6.31               | 7.15             | 34.67  | 0.22 | 0.22             | 0.22             | 0.84     | 0.22 | 0.84             | 0.87             | 0.6  |  |
| 200        | 2        | $t_3$                             | 6 (5.76)  | 7 (2.11)         | 7 (2.13)         | 0 (7.3)  | 113.49 | 9.02               | 9.69             | 30.1   | 0    | 0                | 0                | 0        | 0    | 0                | 0                | 0.01 |  |
| 200        | 4        | $t_3$                             | 4 (6.78)  | 4 (1.85)         | 3 (1.83)         | 0 (7.75) | 94.87  | 5.79               | 6.36             | 26.96  | 0    | 0                | 0                | 0        | 0    | 0                | 0                | 0.09 |  |
| 200        | 6        | $t_3$                             | 2 (8.9)   | 11 (2.04)        | 10 (2.08)        | 0 (8.29) | 95.09  | 5.16               | 6.02             | 31.04  | 0    | 0                | 0                | 0.12     | 0    | 0.12             | 0.12             | 0.3  |  |
| 200        | 8        | $t_3$                             | 1 (9.88)  | 9 (2.57)         | 16 (2.75)        | 0 (9.65) | 97.34  | 6.49               | 7.23             | 34.78  | 0.01 | 0.01             | 0.01             | 0.36     | 0.01 | 0.36             | 0.37             | 0.58 |  |
| 200        | 10       | $t_3$                             | 2 (10.13) | 31 (3.18)        | 33 (3.36)        | 0 (10)   | 96.33  | 7.73               | 8.42             | 35.71  | 0.05 | 0.05             | 0.05             | 0.61     | 0.05 | 0.61             | 0.63             | 0.73 |  |
| 400        | 2        | Gaus.                             | 0 (16.52) | 0 (1.01)         | 0 (1.15)         | 0 (1.01) | 331.97 | 12.93              | 13.51            | 57.21  | 0    | 0                | 0                | 0        | 0    | 0                | 0.01             | 0    |  |
| 400        | 4        | Gaus.                             | 0 (18.5)  | 16 (2.62)        | 31 (3.07)        | 0 (6.36) | 336.06 | 22.06              | 24               | 100.5  | 0    | 0                | 0                | 0.4      | 0    | 0.4              | 0.44             | 0.32 |  |
| 400        | 6        | Gaus.                             | 0 (21.31) | 55 (3.51)        | 80 (3.79)        | 0 (9.19) | 469.93 | 24.08              | 26.06            | 132.4  | 0.05 | 0.05             | 0.05             | 0.75     | 0.05 | 0.75             | 0.78             | 0.5  |  |
| 400        | 8        | Gaus.                             | 2 (20.17) | 85 (3.85)        | 94 (3.94)        | 0 (9.35) | 306.94 | 22.31              | 24.54            | 56.85  | 0.12 | 0.12             | 0.12             | 0.91     | 0.12 | 0.91             | 0.92             | 0.54 |  |
| 400        | 10       | Gaus.                             | 5 (12)    | 94 (3.94)        | 99 (3.99)        | 0 (9.86) | 460.19 | 25.91              | 27.32            | 130.96 | 0.41 | 0.41             | 0.41             | 0.96     | 0.41 | 0.96             | 0.96             | 0.56 |  |
| 400        | 2        | $t_6$                             | 0 (17.11) | 0 (1.02)         | 0 (1.02)         | 0 (1)    | 472.9  | 12.86              | 13.28            | 73.84  | 0    | 0                | 0                | 0        | 0    | 0                | 0                | 0    |  |
| 400        | 4        | $t_6$                             | 0 (18.54) | 1 (1.81)         | 3 (1.93)         | 0 (4.76) | 467.89 | 19.05              | 20.88            | 74.05  | 0    | 0                | 0                | 0.18     | 0    | 0.18             | 0.2              | 0.19 |  |
| 400        | 6        | $t_6$                             | 0 (20.79) | 43 (3.27)        | 40 (3.25)        | 0 (7.72) | 318.59 | 22.96              | 24.48            | 58.12  | 0    | 0                | 0                | 0.6      | 0    | 0.6              | 0.6              | 0.44 |  |
| 400        | 8        | $t_6$                             | 0 (20.9)  | 63 (3.59)        | 64 (3.62)        | 1 (9.07) | 322.19 | 23.33              | 24.88            | 59.43  | 0.05 | 0.05             | 0.05             | 0.79     | 0.05 | 0.79             | 0.79             | 0.57 |  |
| 400        | 10       | $t_6$                             | 0 (18.01) | 83 (3.8)         | 84 (3.86)        | 0 (9.56) | 321.42 | 23.74              | 25.39            | 59.03  | 0.18 | 0.18             | 0.18             | 0.89     | 0.18 | 0.89             | 0.9              | 0.59 |  |
| 400        | 2        | $t_3$                             | 0 (14.7)  | 17 (2.65)        | 18 (2.67)        | 0 (9.37) | 359.93 | 35.55              | 37.04            | 67.36  | 0    | 0                | 0                | 0        | 0    | 0                | 0                | 0    |  |
| 400        | 4        | $t_3$                             | 0 (14.27) | 6 (2.19)         | 7 (2.25)         | 0 (9.48) | 314.18 | 25.93              | 27.17            | 56.33  | 0    | 0                | 0                | 0.02     | 0    | 0.02             | 0.02             | 0.12 |  |
| 400        | 6        | $t_3$                             | 0 (19.87) | 26 (3.03)        | 26 (3.26)        | 0 (9.85) | 309.81 | 28.64              | 31.07            | 59.14  | 0    | 0                | 0                | 0.22     | 0    | 0.22             | 0.24             | 0.36 |  |
| 400        | 8        | $t_3$                             | 0 (22.08) | 34 (3.82)        | 29 (4.01)        | 0 (9.77) | 313.05 | 24.8               | 26.48            | 60.91  | 0.01 | 0.01             | 0.01             | 0.52     | 0.01 | 0.52             | 0.52             | 0.59 |  |
| 400        | 10       | $t_3$                             | 0 (22.8)  | 39 (4.57)        | 34 (4.85)        | 0 (9.93) | 315.53 | 29.11              | 30.68            | 62     | 0.01 | 0.01             | 0.01             | 0.71     | 0.01 | 0.71             | 0.72             | 0.76 |  |

**Table S20:**  $K = 4$  simulation results for high-dimensional settings ( $p = 1000$ ) with equal sized clusters arranged as a tetrahedron. Each setting was replicated 100 times. For each setting, the number of replications detecting the correct number of clusters ( $\hat{K} = 4$ ), the mean number of significant clusters (mean  $\hat{K}$ ), median computing time, and mean adjusted Rand Index (ARI) are reported for pvclust AU  $p$ -values (pvAU), SHC<sub>L</sub>, SHC<sub>2</sub>, and BootClust (BC). Results for pvclust BP  $p$ -values are omitted since no significant clusters were identified across any settings. BootClust results are not reported for the high-dimensional setting (–). ( $N$ : sample size,  $\delta$ : separating signal between clusters,  $F$ : cluster distribution.)

| parameters |          | $ \hat{K} = 4 $ (mean $\hat{K}$ ) |           |                  |                  |    |         | median time (sec.) |                  |    |      |                  |                  | mean ARI |      |                  |                  |    |
|------------|----------|-----------------------------------|-----------|------------------|------------------|----|---------|--------------------|------------------|----|------|------------------|------------------|----------|------|------------------|------------------|----|
| $N$        | $\delta$ | $F$                               | pvAU      | SHC <sub>L</sub> | SHC <sub>2</sub> | BC | pv      | SHC <sub>L</sub>   | SHC <sub>2</sub> | BC | pvAU | SHC <sub>L</sub> | SHC <sub>2</sub> | BC       | pvAU | SHC <sub>L</sub> | SHC <sub>2</sub> | BC |
| 200        | 4        | Gaus.                             | 24 (4.64) | 0 (1.03)         | 0 (1.08)         | –  | 287.59  | 31.64              | 34.49            | –  | 0    | 0.01             | 0.02             | –        | 0    | 0.01             | 0.02             | –  |
| 200        | 8        | Gaus.                             | 17 (5.88) | 8 (2.5)          | 24 (2.82)        | –  | 287.68  | 60.91              | 68.5             | –  | 0    | 0.49             | 0.55             | –        | 0    | 0.49             | 0.55             | –  |
| 200        | 12       | Gaus.                             | 5 (7.59)  | 58 (3.51)        | 72 (3.7)         | –  | 301.51  | 57.63              | 64.69            | –  | 0.11 | 0.83             | 0.87             | –        | 0.11 | 0.83             | 0.87             | –  |
| 200        | 16       | Gaus.                             | 12 (5.72) | 85 (3.84)        | 90 (3.9)         | –  | 288.94  | 66.91              | 74.58            | –  | 0.35 | 0.94             | 0.95             | –        | 0.35 | 0.94             | 0.95             | –  |
| 200        | 20       | Gaus.                             | 20 (4.66) | 88 (3.85)        | 94 (3.93)        | –  | 287.86  | 61.05              | 67.74            | –  | 0.56 | 0.95             | 0.97             | –        | 0.56 | 0.95             | 0.97             | –  |
| 200        | 4        | $t_6$                             | 15 (4.71) | 0 (1.02)         | 0 (1.02)         | –  | 295.92  | 31.52              | 33.61            | –  | 0    | 0                | 0                | –        | 0    | 0                | 0                | –  |
| 200        | 8        | $t_6$                             | 15 (5.17) | 1 (1.71)         | 1 (1.75)         | –  | 292.58  | 50.82              | 63.25            | –  | 0    | 0.2              | 0.22             | –        | 0    | 0.2              | 0.22             | –  |
| 200        | 12       | $t_6$                             | 12 (6.39) | 27 (3.06)        | 30 (3.15)        | –  | 285.55  | 55.22              | 63.07            | –  | 0.02 | 0.68             | 0.7              | –        | 0.02 | 0.68             | 0.7              | –  |
| 200        | 16       | $t_6$                             | 8 (6.4)   | 76 (3.74)        | 76 (3.74)        | –  | 288.51  | 61.74              | 68.94            | –  | 0.19 | 0.9              | 0.9              | –        | 0.19 | 0.9              | 0.9              | –  |
| 200        | 20       | $t_6$                             | 13 (5.57) | 86 (3.84)        | 87 (3.85)        | –  | 301.24  | 66.21              | 73.03            | –  | 0.37 | 0.95             | 0.95             | –        | 0.37 | 0.95             | 0.95             | –  |
| 200        | 4        | $t_3$                             | 12 (2.63) | 15 (2.75)        | 14 (2.71)        | –  | 290.49  | 83.68              | 88.93            | –  | 0    | 0                | 0                | –        | 0    | 0                | 0                | –  |
| 200        | 8        | $t_3$                             | 19 (3.04) | 9 (2.43)         | 11 (2.44)        | –  | 290.43  | 75.93              | 79.17            | –  | 0    | 0.02             | 0.01             | –        | 0    | 0.02             | 0.01             | –  |
| 200        | 12       | $t_3$                             | 15 (4.12) | 14 (2.83)        | 13 (2.89)        | –  | 290.84  | 79.15              | 84.67            | –  | 0    | 0.26             | 0.26             | –        | 0    | 0.26             | 0.26             | –  |
| 200        | 16       | $t_3$                             | 23 (4.98) | 29 (3.13)        | 27 (3.18)        | –  | 291.32  | 71.36              | 78.44            | –  | 0.05 | 0.5              | 0.51             | –        | 0.05 | 0.5              | 0.51             | –  |
| 200        | 20       | $t_3$                             | 16 (5.29) | 37 (3.58)        | 35 (3.77)        | –  | 293.21  | 67.61              | 74               | –  | 0.17 | 0.66             | 0.69             | –        | 0.17 | 0.66             | 0.69             | –  |
| 400        | 4        | Gaus.                             | 1 (9.86)  | 0 (1.12)         | 0 (1.14)         | –  | 1301.21 | 118.97             | 126.88           | –  | 0    | 0.02             | 0.02             | –        | 0    | 0.02             | 0.02             | –  |
| 400        | 8        | Gaus.                             | 0 (13.31) | 36 (3.23)        | 44 (3.34)        | –  | 1307.24 | 221.41             | 239.46           | –  | 0.01 | 0.62             | 0.64             | –        | 0.01 | 0.62             | 0.64             | –  |
| 400        | 12       | Gaus.                             | 1 (13.45) | 79 (3.79)        | 81 (3.81)        | –  | 1304.33 | 298.74             | 311.4            | –  | 0.1  | 0.89             | 0.9              | –        | 0.1  | 0.89             | 0.9              | –  |
| 400        | 16       | Gaus.                             | 4 (10.48) | 93 (3.91)        | 97 (3.97)        | –  | 1307.39 | 230.55             | 246.18           | –  | 0.35 | 0.95             | 0.97             | –        | 0.35 | 0.95             | 0.97             | –  |
| 400        | 20       | Gaus.                             | 12 (7.37) | 98 (3.96)        | 98 (3.96)        | –  | 1301.7  | 237.29             | 251.45           | –  | 0.5  | 0.98             | 0.98             | –        | 0.5  | 0.98             | 0.98             | –  |
| 400        | 4        | $t_6$                             | 1 (9.84)  | 0 (1.01)         | 0 (1.02)         | –  | 1300.13 | 117.12             | 122.58           | –  | 0    | 0                | 0                | –        | 0    | 0                | 0                | –  |
| 400        | 8        | $t_6$                             | 1 (10.88) | 19 (2.78)        | 21 (2.79)        | –  | 1161.19 | 258.65             | 271              | –  | 0    | 0.45             | 0.45             | –        | 0    | 0.45             | 0.45             | –  |
| 400        | 12       | $t_6$                             | 1 (12.38) | 47 (3.38)        | 48 (3.39)        | –  | 1156.08 | 232.06             | 245.57           | –  | 0.02 | 0.73             | 0.74             | –        | 0.02 | 0.73             | 0.74             | –  |
| 400        | 16       | $t_6$                             | 0 (11.61) | 84 (3.84)        | 83 (3.83)        | –  | 1170.46 | 232.33             | 244.81           | –  | 0.15 | 0.91             | 0.91             | –        | 0.15 | 0.91             | 0.91             | –  |
| 400        | 20       | $t_6$                             | 3 (10.3)  | 88 (3.9)         | 88 (3.9)         | –  | 1291.06 | 231.1              | 245.73           | –  | 0.31 | 0.95             | 0.95             | –        | 0.31 | 0.95             | 0.95             | –  |
| 400        | 4        | $t_3$                             | 4 (5.86)  | 21 (4.35)        | 19 (4.36)        | –  | 1318.48 | 553.35             | 571.23           | –  | 0    | 0                | 0                | –        | 0    | 0                | 0                | –  |
| 400        | 8        | $t_3$                             | 3 (6.66)  | 19 (3.94)        | 21 (4)           | –  | 1318.62 | 443.06             | 464.14           | –  | 0    | 0.05             | 0.06             | –        | 0    | 0.05             | 0.06             | –  |
| 400        | 12       | $t_3$                             | 2 (9.21)  | 27 (4.32)        | 24 (4.44)        | –  | 1297.52 | 332.13             | 354.86           | –  | 0    | 0.43             | 0.44             | –        | 0    | 0.43             | 0.44             | –  |
| 400        | 16       | $t_3$                             | 1 (10.07) | 23 (5.28)        | 19 (5.41)        | –  | 1304.03 | 294.21             | 307.06           | –  | 0.02 | 0.71             | 0.71             | –        | 0.02 | 0.71             | 0.71             | –  |
| 400        | 20       | $t_3$                             | 0 (11.16) | 19 (5.5)         | 18 (5.7)         | –  | 1211.91 | 249.4              | 269.83           | –  | 0.09 | 0.85             | 0.85             | –        | 0.09 | 0.85             | 0.85             | –  |

**Table S21:**  $K = 5$  simulation results with equal sized clusters. Each setting was replicated 100 times. For each setting, the number of replications detecting the correct number of clusters ( $|\hat{K} = 5|$ ), the mean number of significant clusters (mean  $\hat{K}$ ), median computing time, and mean adjusted Rand Index (ARI) are reported for pvCluster AU  $p$ -values (pvAU), BP  $p$ -values (pvBP), SHC<sub>L</sub>, SHC<sub>2</sub>, and BootCluster (BC). BootCluster results are not reported for the high-dimensional setting (-). ( $N$ : sample size,  $p$ : dimension,  $\delta$ : separating signal between clusters,  $F$ : cluster distribution.)

| parameters |      | $ \hat{K} = 5 $ (mean $\hat{K}$ ) |       |           |          |                  |                  |           |        |                  |                  | median time (sec.) |      |      |                  |                  | mean ARI |      |      |                  |                  |    |
|------------|------|-----------------------------------|-------|-----------|----------|------------------|------------------|-----------|--------|------------------|------------------|--------------------|------|------|------------------|------------------|----------|------|------|------------------|------------------|----|
| $N$        | $p$  | $\delta$                          | $F$   | pvAU      | pvBP     | SHC <sub>L</sub> | SHC <sub>2</sub> | BC        | pv     | SHC <sub>L</sub> | SHC <sub>2</sub> | BC                 | pvAU | pvBP | SHC <sub>L</sub> | SHC <sub>2</sub> | BC       | pvAU | pvBP | SHC <sub>L</sub> | SHC <sub>2</sub> | BC |
| 250        | 10   | 4                                 | Gaus. | 0 (52.42) | 0 (1)    | 0 (2.24)         | 2 (2.62)         | 13 (3.52) | 119.44 | 1.58             | 2.17             | 5.61               | 0.06 | 0    | 0.31             | 0.38             | 0.51     |      |      |                  |                  |    |
| 250        | 10   | 8                                 | Gaus. | 0 (8.13)  | 0 (1)    | 44 (4.28)        | 66 (4.65)        | 66 (4.65) | 118.38 | 2.07             | 2.88             | 5.58               | 0.5  | 0    | 0.83             | 0.9              | 0.9      |      |      |                  |                  |    |
| 250        | 10   | 12                                | Gaus. | 10 (5.59) | 0 (1)    | 80 (4.7)         | 89 (4.87)        | 92 (4.92) | 117.61 | 2.12             | 2.74             | 5.37               | 0.62 | 0    | 0.93             | 0.97             | 0.97     |      |      |                  |                  |    |
| 250        | 10   | 16                                | Gaus. | 19 (3.85) | 0 (1.01) | 93 (4.83)        | 99 (4.99)        | 99 (4.99) | 120.89 | 2.49             | 3.02             | 6.63               | 0.67 | 0    | 0.96             | 1                | 1        |      |      |                  |                  |    |
| 250        | 10   | 20                                | Gaus. | 24 (3.97) | 0 (1.01) | 94 (4.84)        | 99 (4.99)        | 99 (4.99) | 117.49 | 2.09             | 2.97             | 5.46               | 0.68 | 0.03 | 0.96             | 1                | 1        |      |      |                  |                  |    |
| 250        | 10   | 4                                 | $t_6$ | 0 (54.12) | 0 (1)    | 0 (1.82)         | 0 (2.08)         | 11 (3.12) | 123.53 | 1.44             | 1.95             | 5.86               | 0.03 | 0    | 0.21             | 0.26             | 0.38     |      |      |                  |                  |    |
| 250        | 10   | 8                                 | $t_6$ | 0 (17.56) | 0 (1)    | 34 (3.82)        | 57 (4.4)         | 58 (4.69) | 120.43 | 2.21             | 2.85             | 6.03               | 0.38 | 0    | 0.72             | 0.83             | 0.84     |      |      |                  |                  |    |
| 250        | 10   | 12                                | $t_6$ | 4 (7.43)  | 0 (1)    | 77 (4.69)        | 88 (4.84)        | 90 (4.89) | 123.55 | 2.64             | 3.24             | 6.79               | 0.53 | 0    | 0.92             | 0.95             | 0.96     |      |      |                  |                  |    |
| 250        | 10   | 16                                | $t_6$ | 7 (4.54)  | 0 (1)    | 81 (4.74)        | 93 (4.93)        | 92 (4.92) | 118.55 | 2.09             | 2.95             | 5.32               | 0.6  | 0    | 0.94             | 0.98             | 0.98     |      |      |                  |                  |    |
| 250        | 10   | 20                                | $t_6$ | 13 (3.89) | 0 (1)    | 92 (4.89)        | 98 (4.98)        | 98 (4.98) | 123.63 | 2.44             | 3.11             | 6                  | 0.67 | 0.01 | 0.97             | 0.99             | 0.99     |      |      |                  |                  |    |
| 250        | 10   | 4                                 | $t_3$ | 0 (51.07) | 0 (1)    | 0 (1.32)         | 0 (1.35)         | 0 (6.3)   | 121.06 | 1.22             | 1.4              | 5.88               | 0.02 | 0    | 0.06             | 0.06             | 0.29     |      |      |                  |                  |    |
| 250        | 10   | 8                                 | $t_3$ | 0 (42.22) | 0 (1)    | 4 (2.73)         | 20 (3.43)        | 22 (7)    | 108.62 | 1.68             | 2.18             | 4.45               | 0.2  | 0    | 0.43             | 0.53             | 0.72     |      |      |                  |                  |    |
| 250        | 10   | 12                                | $t_3$ | 0 (18.34) | 0 (1)    | 35 (3.98)        | 48 (4.6)         | 43 (6.93) | 123.86 | 2.09             | 3                | 5.79               | 0.43 | 0    | 0.72             | 0.8              | 0.86     |      |      |                  |                  |    |
| 250        | 10   | 16                                | $t_3$ | 4 (10.53) | 0 (1)    | 68 (4.63)        | 66 (5.11)        | 57 (6.79) | 122.74 | 2.3              | 3.1              | 5.9                | 0.55 | 0    | 0.89             | 0.94             | 0.93     |      |      |                  |                  |    |
| 250        | 10   | 20                                | $t_3$ | 5 (7.89)  | 0 (1)    | 82 (4.81)        | 71 (5.13)        | 62 (6.84) | 122.67 | 2.72             | 3.36             | 6.81               | 0.6  | 0    | 0.93             | 0.95             | 0.96     |      |      |                  |                  |    |
| 250        | 100  | 4                                 | Gaus. | 2 (11.12) | 0 (1)    | 0 (2.07)         | 0 (2.46)         | 0 (5.75)  | 171.68 | 9.36             | 11.27            | 33.04              | 0    | 0    | 0.23             | 0.29             | 0.23     |      |      |                  |                  |    |
| 250        | 100  | 8                                 | Gaus. | 1 (10.73) | 0 (1)    | 20 (3.92)        | 28 (4.08)        | 0 (9.92)  | 161.24 | 10.52            | 11.72            | 33.63              | 0.17 | 0    | 0.74             | 0.76             | 0.6      |      |      |                  |                  |    |
| 250        | 100  | 12                                | Gaus. | 7 (5.9)   | 0 (1)    | 64 (4.63)        | 71 (4.7)         | 0 (10)    | 162.91 | 10.29            | 11.62            | 35.46              | 0.51 | 0    | 0.91             | 0.92             | 0.67     |      |      |                  |                  |    |
| 250        | 100  | 16                                | Gaus. | 14 (4.28) | 0 (1)    | 85 (4.78)        | 91 (4.91)        | 0 (10)    | 169.22 | 9.48             | 10.57            | 36.43              | 0.64 | 0    | 0.95             | 0.98             | 0.68     |      |      |                  |                  |    |
| 250        | 100  | 20                                | Gaus. | 30 (4.17) | 0 (1)    | 95 (4.92)        | 97 (4.97)        | 0 (10)    | 161.5  | 13.31            | 14.39            | 33.58              | 0.72 | 0    | 0.98             | 0.99             | 0.69     |      |      |                  |                  |    |
| 250        | 100  | 4                                 | $t_6$ | 1 (9.96)  | 0 (1)    | 0 (1.4)          | 0 (1.41)         | 0 (3.42)  | 165.22 | 5.07             | 5.73             | 28.2               | 0    | 0    | 0.08             | 0.08             | 0.08     |      |      |                  |                  |    |
| 250        | 100  | 8                                 | $t_6$ | 2 (13.11) | 0 (1)    | 5 (3.48)         | 10 (3.59)        | 0 (9.76)  | 167.99 | 9.08             | 10.09            | 35.76              | 0.04 | 0    | 0.62             | 0.64             | 0.58     |      |      |                  |                  |    |
| 250        | 100  | 12                                | $t_6$ | 5 (8.69)  | 0 (1)    | 35 (4.24)        | 43 (4.4)         | 0 (10)    | 164    | 10.96            | 12.3             | 36.17              | 0.31 | 0    | 0.82             | 0.85             | 0.71     |      |      |                  |                  |    |
| 250        | 100  | 16                                | $t_6$ | 7 (4.7)   | 0 (1)    | 80 (4.73)        | 82 (4.8)         | 0 (10)    | 147.08 | 9.83             | 11.15            | 32.37              | 0.52 | 0    | 0.93             | 0.95             | 0.73     |      |      |                  |                  |    |
| 250        | 100  | 20                                | $t_6$ | 13 (5.07) | 0 (1)    | 83 (4.71)        | 89 (4.87)        | 0 (10)    | 169.32 | 11.78            | 13.48            | 38.56              | 0.62 | 0    | 0.93             | 0.97             | 0.76     |      |      |                  |                  |    |
| 250        | 100  | 4                                 | $t_3$ | 1 (8.28)  | 0 (1)    | 3 (2.2)          | 3 (2.18)         | 0 (7.94)  | 173.71 | 9.06             | 9.74             | 42.47              | 0    | 0    | 0                | 0                | 0.08     |      |      |                  |                  |    |
| 250        | 100  | 8                                 | $t_3$ | 0 (12.22) | 0 (1)    | 5 (2.77)         | 5 (2.94)         | 0 (9.67)  | 172.02 | 9.92             | 10.57            | 44.76              | 0.01 | 0    | 0.3              | 0.33             | 0.51     |      |      |                  |                  |    |
| 250        | 100  | 12                                | $t_3$ | 0 (13.32) | 0 (1)    | 22 (3.91)        | 25 (4.21)        | 0 (10)    | 174    | 10.59            | 11.86            | 43.66              | 0.09 | 0    | 0.64             | 0.66             | 0.76     |      |      |                  |                  |    |
| 250        | 100  | 16                                | $t_3$ | 2 (11.09) | 0 (1)    | 46 (4.55)        | 48 (4.94)        | 0 (10)    | 130.43 | 13.15            | 13.93            | 30.11              | 0.29 | 0    | 0.8              | 0.84             | 0.88     |      |      |                  |                  |    |
| 250        | 100  | 20                                | $t_3$ | 4 (8.64)  | 0 (1)    | 57 (4.66)        | 46 (5.19)        | 0 (10)    | 136.92 | 9.88             | 11.21            | 30.94              | 0.44 | 0    | 0.84             | 0.9              | 0.92     |      |      |                  |                  |    |
| 250        | 1000 | 5                                 | Gaus. | 18 (6.03) | 0 (1)    | 0 (1.3)          | 0 (1.36)         | -         | 571.44 | 66.82            | 72.59            | -                  | 0    | 0    | 0.06             | 0.07             | -        |      |      |                  |                  |    |
| 250        | 1000 | 10                                | Gaus. | 10 (8.56) | 0 (1)    | 4 (3.3)          | 13 (3.69)        | -         | 605.9  | 92.05            | 102.7            | -                  | 0.02 | 0    | 0.58             | 0.64             | -        |      |      |                  |                  |    |
| 250        | 1000 | 15                                | Gaus. | 3 (7.67)  | 0 (1)    | 53 (4.39)        | 69 (4.67)        | -         | 623.62 | 111.32           | 125.83           | -                  | 0.22 | 0    | 0.86             | 0.9              | -        |      |      |                  |                  |    |
| 250        | 1000 | 20                                | Gaus. | 13 (5.44) | 0 (1)    | 79 (4.75)        | 86 (4.84)        | -         | 611.89 | 94.44            | 102.01           | -                  | 0.51 | 0    | 0.94             | 0.95             | -        |      |      |                  |                  |    |
| 250        | 1000 | 25                                | Gaus. | 16 (4.23) | 0 (1)    | 83 (4.74)        | 91 (4.88)        | -         | 661.95 | 94.67            | 104.36           | -                  | 0.58 | 0    | 0.94             | 0.96             | -        |      |      |                  |                  |    |
| 250        | 1000 | 5                                 | $t_6$ | 15 (5.49) | 0 (1)    | 0 (1.03)         | 0 (1.03)         | -         | 622.27 | 46.42            | 48.78            | -                  | 0    | 0    | 0.01             | 0.01             | -        |      |      |                  |                  |    |
| 250        | 1000 | 10                                | $t_6$ | 10 (6.83) | 0 (1)    | 1 (2.62)         | 2 (2.71)         | -         | 587.17 | 84.05            | 90.13            | -                  | 0    | 0    | 0.41             | 0.42             | -        |      |      |                  |                  |    |
| 250        | 1000 | 15                                | $t_6$ | 8 (7.93)  | 0 (1)    | 25 (3.92)        | 31 (4)           | -         | 599.97 | 92.61            | 100.2            | -                  | 0.08 | 0    | 0.75             | 0.76             | -        |      |      |                  |                  |    |
| 250        | 1000 | 20                                | $t_6$ | 9 (6.41)  | 0 (1)    | 58 (4.5)         | 60 (4.52)        | -         | 729.29 | 86.43            | 94.67            | -                  | 0.31 | 0    | 0.88             | 0.88             | -        |      |      |                  |                  |    |
| 250        | 1000 | 25                                | $t_6$ | 13 (5.39) | 0 (1)    | 81 (4.77)        | 84 (4.83)        | -         | 607.59 | 94.81            | 103.58           | -                  | 0.51 | 0    | 0.94             | 0.96             | -        |      |      |                  |                  |    |
| 250        | 1000 | 5                                 | $t_3$ | 9 (3.49)  | 0 (1)    | 13 (3.21)        | 13 (3.26)        | -         | 678.42 | 148.44           | 159.03           | -                  | 0    | 0    | 0                | 0                | -        |      |      |                  |                  |    |
| 250        | 1000 | 10                                | $t_3$ | 14 (4.33) | 0 (1)    | 6 (2.84)         | 6 (2.87)         | -         | 699.39 | 140.13           | 149.98           | -                  | 0    | 0    | 0.1              | 0.11             | -        |      |      |                  |                  |    |
| 250        | 1000 | 15                                | $t_3$ | 20 (5.73) | 0 (1)    | 13 (3.62)        | 10 (3.68)        | -         | 687.27 | 115.76           | 124.45           | -                  | 0.02 | 0    | 0.4              | 0.4              | -        |      |      |                  |                  |    |
| 250        | 1000 | 20                                | $t_3$ | 11 (6.6)  | 0 (1)    | 29 (4.18)        | 29 (4.32)        | -         | 680.23 | 105.84           | 116.26           | -                  | 0.11 | 0    | 0.62             | 0.63             | -        |      |      |                  |                  |    |
| 250        | 1000 | 25                                | $t_3$ | 17 (6.26) | 0 (1)    | 29 (4.57)        | 34 (4.66)        | -         | 622.88 | 112.8            | 123.2            | -                  | 0.27 | 0    | 0.74             | 0.75             | -        |      |      |                  |                  |    |

**Table S22:**  $K = 6$  simulation results with equal sized clusters. Each setting was replicated 100 times. For each setting, the number of replications detecting the correct number of clusters ( $|\hat{K} = 6|$ ), the mean number of significant clusters (mean  $\hat{K}$ ), median computing time, and mean adjusted Rand Index (ARI) are reported for pvcLust AU  $p$ -values (pvAU), BP  $p$ -values (pvBP),  $SHC_L$ ,  $SHC_2$ , and BootClust (BC). BootClust results are not reported for the high-dimensional setting (-). ( $N$ : sample size,  $p$ : dimension,  $\delta$ : separating signal between clusters,  $F$ : cluster distribution.)

| $N$ | $p$  | $\delta$ | $F$   | $ \hat{K} = 6 $ (mean $\hat{K}$ ) |          |           |           | median time (sec.) |        |         |         | mean ARI |      |      |         |         |      |
|-----|------|----------|-------|-----------------------------------|----------|-----------|-----------|--------------------|--------|---------|---------|----------|------|------|---------|---------|------|
|     |      |          |       | pvAU                              | pvBP     | $SHC_L$   | $SHC_2$   | BC                 | pv     | $SHC_L$ | $SHC_2$ | BC       | pvAU | pvBP | $SHC_L$ | $SHC_2$ | BC   |
| 300 | 10   | 4        | Gaus. | 0 (64.17)                         | 0 (1)    | 0 (2.46)  | 1 (2.95)  | 13 (4.22)          | 140.26 | 1.98    | 2.48    | 6.1      | 0.05 | 0    | 0.31    | 0.36    | 0.52 |
| 300 | 10   | 8        | Gaus. | 2 (6.73)                          | 0 (1)    | 55 (5.26) | 78 (5.72) | 80 (5.78)          | 145.95 | 2.68    | 3.42    | 6.75     | 0.47 | 0    | 0.86    | 0.93    | 0.94 |
| 300 | 10   | 12       | Gaus. | 10 (4.25)                         | 0 (1)    | 91 (5.79) | 98 (5.94) | 99 (5.99)          | 166.73 | 3.21    | 4.17    | 8.32     | 0.65 | 0    | 0.96    | 0.98    | 0.99 |
| 300 | 10   | 16       | Gaus. | 19 (4.5)                          | 0 (1)    | 92 (5.82) | 97 (5.97) | 98 (5.98)          | 170.82 | 3.26    | 4.32    | 8.62     | 0.71 | 0.02 | 0.97    | 1       | 1    |
| 300 | 10   | 20       | Gaus. | 24 (4.67)                         | 0 (1.17) | 96 (5.88) | 99 (5.99) | 99 (5.99)          | 172.88 | 3.29    | 4.19    | 8.4      | 0.74 | 0.14 | 0.98    | 1       | 1    |
| 300 | 10   | 4        | $t_6$ | 0 (66.27)                         | 0 (1)    | 0 (1.98)  | 0 (2.33)  | 12 (4.1)           | 163.89 | 1.88    | 2.51    | 9.92     | 0.03 | 0    | 0.19    | 0.24    | 0.42 |
| 300 | 10   | 8        | $t_6$ | 0 (25.18)                         | 0 (1)    | 20 (4.43) | 50 (5.16) | 64 (5.69)          | 180.95 | 3.74    | 4.47    | 9.84     | 0.4  | 0    | 0.7     | 0.8     | 0.87 |
| 300 | 10   | 12       | $t_6$ | 2 (5.17)                          | 0 (1)    | 73 (5.55) | 93 (5.89) | 95 (5.95)          | 170.98 | 3.96    | 4.58    | 9.81     | 0.49 | 0    | 0.91    | 0.96    | 0.98 |
| 300 | 10   | 16       | $t_6$ | 4 (4.11)                          | 0 (1)    | 89 (5.81) | 96 (5.94) | 98 (6.03)          | 174.05 | 4.09    | 4.74    | 9.83     | 0.55 | 0    | 0.96    | 0.98    | 0.99 |
| 300 | 10   | 20       | $t_6$ | 14 (4.06)                         | 0 (1)    | 91 (5.8)  | 96 (5.98) | 96 (6.01)          | 175.32 | 4.04    | 4.68    | 9.88     | 0.65 | 0.01 | 0.96    | 0.99    | 0.99 |
| 300 | 10   | 4        | $t_3$ | 0 (62.07)                         | 0 (1)    | 0 (1.39)  | 0 (1.53)  | 0 (7.37)           | 176.01 | 1.75    | 2.2     | 9.17     | 0.02 | 0    | 0.06    | 0.07    | 0.3  |
| 300 | 10   | 8        | $t_3$ | 0 (47.88)                         | 0 (1)    | 9 (3.74)  | 26 (4.49) | 20 (7.54)          | 178.72 | 2.91    | 3.87    | 9.36     | 0.2  | 0    | 0.54    | 0.61    | 0.77 |
| 300 | 10   | 12       | $t_3$ | 2 (22.8)                          | 0 (1)    | 42 (5.13) | 62 (5.9)  | 55 (7.55)          | 142    | 2.99    | 3.52    | 6.04     | 0.48 | 0    | 0.8     | 0.89    | 0.92 |
| 300 | 10   | 16       | $t_3$ | 2 (9.71)                          | 0 (1)    | 71 (5.64) | 70 (6.04) | 66 (7.26)          | 169.76 | 3.62    | 4.25    | 9.69     | 0.54 | 0    | 0.9     | 0.94    | 0.96 |
| 300 | 10   | 20       | $t_3$ | 8 (7.11)                          | 0 (1)    | 84 (5.61) | 66 (6.27) | 56 (7.76)          | 185.79 | 3.89    | 4.66    | 9.87     | 0.61 | 0    | 0.92    | 0.97    | 0.98 |
| 300 | 100  | 4        | Gaus. | 1 (13.28)                         | 0 (1)    | 0 (2.24)  | 0 (2.85)  | 0 (6.78)           | 216.47 | 11.25   | 12.99   | 40.72    | 0    | 0    | 0.21    | 0.28    | 0.27 |
| 300 | 100  | 8        | Gaus. | 2 (12.3)                          | 0 (1)    | 24 (4.96) | 32 (5.09) | 0 (10)             | 226.32 | 13.92   | 15.38   | 46.67    | 0.22 | 0    | 0.8     | 0.81    | 0.73 |
| 300 | 100  | 12       | Gaus. | 10 (5.79)                         | 0 (1)    | 78 (5.76) | 83 (5.83) | 0 (10)             | 224.3  | 13.51   | 14.99   | 48.97    | 0.57 | 0    | 0.96    | 0.97    | 0.78 |
| 300 | 100  | 16       | Gaus. | 14 (4.67)                         | 0 (1)    | 96 (5.89) | 96 (5.92) | 0 (10)             | 221.38 | 14.66   | 16.19   | 47.3     | 0.66 | 0    | 0.98    | 0.98    | 0.78 |
| 300 | 100  | 20       | Gaus. | 24 (4.43)                         | 0 (1)    | 94 (5.9)  | 98 (5.98) | 0 (10)             | 182.94 | 13.78   | 15.34   | 34.91    | 0.72 | 0    | 0.98    | 1       | 0.79 |
| 300 | 100  | 4        | $t_6$ | 3 (12.57)                         | 0 (1)    | 0 (1.46)  | 0 (1.49)  | 0 (3.27)           | 241.71 | 9.15    | 10.19   | 43.89    | 0    | 0    | 0.07    | 0.07    | 0.09 |
| 300 | 100  | 8        | $t_6$ | 0 (17.31)                         | 0 (1)    | 7 (4.13)  | 14 (4.4)  | 0 (9.84)           | 237.17 | 16.45   | 17.93   | 78.29    | 0.03 | 0    | 0.63    | 0.65    | 0.68 |
| 300 | 100  | 12       | $t_6$ | 4 (9.41)                          | 0 (1)    | 49 (5.3)  | 58 (5.44) | 0 (10)             | 242.79 | 14.68   | 16.44   | 80.12    | 0.4  | 0    | 0.87    | 0.89    | 0.8  |
| 300 | 100  | 16       | $t_6$ | 5 (5.74)                          | 0 (1)    | 84 (5.79) | 88 (5.86) | 0 (10)             | 253.98 | 16.91   | 18.52   | 78.95    | 0.57 | 0    | 0.96    | 0.97    | 0.83 |
| 300 | 100  | 20       | $t_6$ | 8 (4.84)                          | 0 (1)    | 95 (5.82) | 98 (5.92) | 0 (10)             | 201.5  | 14.06   | 15.39   | 39.42    | 0.63 | 0    | 0.96    | 0.98    | 0.83 |
| 300 | 100  | 4        | $t_3$ | 2 (10.65)                         | 0 (1)    | 0 (2.08)  | 0 (2.07)  | 0 (9.1)            | 245.4  | 12.78   | 13.8    | 51.94    | 0    | 0    | 0       | 0       | 0.08 |
| 300 | 100  | 8        | $t_3$ | 0 (16.16)                         | 0 (1)    | 3 (2.98)  | 2 (3.18)  | 0 (9.84)           | 250.7  | 13.66   | 14.85   | 73.51    | 0.01 | 0    | 0.29    | 0.3     | 0.52 |
| 300 | 100  | 12       | $t_3$ | 0 (16.24)                         | 0 (1)    | 16 (4.64) | 19 (5.03) | 0 (10)             | 242.7  | 14.5    | 15.97   | 54.93    | 0.07 | 0    | 0.64    | 0.67    | 0.8  |
| 300 | 100  | 16       | $t_3$ | 1 (13.21)                         | 0 (1)    | 39 (5.52) | 43 (6.11) | 0 (10)             | 199.2  | 16.67   | 17.98   | 41.78    | 0.32 | 0    | 0.83    | 0.87    | 0.92 |
| 300 | 100  | 20       | $t_3$ | 6 (9)                             | 0 (1)    | 62 (5.76) | 46 (6.37) | 0 (10)             | 200.8  | 14.3    | 16      | 41.71    | 0.51 | 0    | 0.9     | 0.93    | 0.95 |
| 300 | 1000 | 5        | Gaus. | 10 (7.89)                         | 0 (1)    | 0 (1.37)  | 0 (1.41)  | -                  | 933.71 | 96.03   | 102.6   | -        | 0    | 0    | 0.06    | 0.06    | -    |
| 300 | 1000 | 10       | Gaus. | 5 (10.79)                         | 0 (1)    | 7 (4.26)  | 23 (4.78) | -                  | 950.41 | 146.17  | 157.97  | -        | 0.02 | 0    | 0.65    | 0.71    | -    |
| 300 | 1000 | 15       | Gaus. | 5 (8.1)                           | 0 (1)    | 63 (5.58) | 76 (5.76) | -                  | 1014.4 | 136.28  | 146.92  | -        | 0.33 | 0    | 0.91    | 0.93    | -    |
| 300 | 1000 | 20       | Gaus. | 12 (6.01)                         | 0 (1)    | 85 (5.85) | 91 (5.91) | -                  | 866.43 | 142.45  | 155.67  | -        | 0.59 | 0    | 0.97    | 0.98    | -    |
| 300 | 1000 | 25       | Gaus. | 15 (4.85)                         | 0 (1)    | 93 (5.93) | 96 (5.96) | -                  | 675.07 | 138.29  | 149.48  | -        | 0.67 | 0    | 0.99    | 0.99    | -    |
| 300 | 1000 | 5        | $t_6$ | 14 (7.39)                         | 0 (1)    | 0 (1.02)  | 0 (1.02)  | -                  | 921.02 | 71.71   | 75.68   | -        | 0    | 0    | 0       | 0       | -    |
| 300 | 1000 | 10       | $t_6$ | 7 (8.9)                           | 0 (1)    | 0 (3.2)   | 0 (3.21)  | -                  | 696.63 | 114.13  | 123.69  | -        | 0    | 0    | 0.42    | 0.42    | -    |
| 300 | 1000 | 15       | $t_6$ | 5 (10.45)                         | 0 (1)    | 25 (4.99) | 28 (5)    | -                  | 748.48 | 129.67  | 140.22  | -        | 0.13 | 0    | 0.8     | 0.8     | -    |
| 300 | 1000 | 20       | $t_6$ | 8 (7.5)                           | 0 (1)    | 57 (5.42) | 59 (5.5)  | -                  | 868.52 | 131.78  | 143.09  | -        | 0.4  | 0    | 0.89    | 0.9     | -    |
| 300 | 1000 | 25       | $t_6$ | 12 (5.1)                          | 0 (1)    | 80 (5.73) | 84 (5.81) | -                  | 942.12 | 130.85  | 142.88  | -        | 0.56 | 0    | 0.95    | 0.96    | -    |
| 300 | 1000 | 5        | $t_3$ | 11 (3.99)                         | 0 (1)    | 3 (3.26)  | 3 (3.26)  | -                  | 951.81 | 194.75  | 211.01  | -        | 0    | 0    | 0       | 0       | -    |
| 300 | 1000 | 10       | $t_3$ | 18 (5.2)                          | 0 (1)    | 7 (3.04)  | 4 (3.03)  | -                  | 949.23 | 193.98  | 200.28  | -        | 0    | 0    | 0.09    | 0.09    | -    |
| 300 | 1000 | 15       | $t_3$ | 15 (8.44)                         | 0 (1)    | 4 (3.88)  | 8 (3.97)  | -                  | 921.06 | 150.42  | 161.42  | -        | 0.01 | 0    | 0.39    | 0.4     | -    |
| 300 | 1000 | 20       | $t_3$ | 9 (8.76)                          | 0 (1)    | 14 (4.82) | 22 (5.12) | -                  | 837.73 | 163.08  | 182.24  | -        | 0.1  | 0    | 0.64    | 0.67    | -    |
| 300 | 1000 | 25       | $t_3$ | 12 (8.21)                         | 0 (1)    | 34 (5.31) | 38 (5.43) | -                  | 917.31 | 149.73  | 162.98  | -        | 0.28 | 0    | 0.77    | 0.79    | -    |

**Table S23:**  $K = 7$  simulation results with equal sized clusters. Each setting was replicated 100 times. For each setting, the number of replications detecting the correct number of clusters ( $|\hat{K} = 7|$ ), the mean number of significant clusters (mean  $\hat{K}$ ), median computing time, and mean adjusted Rand Index (ARI) are reported for pvClust AU  $p$ -values (pvAU), BP  $p$ -values (pvBP), SHC<sub>L</sub>, SHC<sub>2</sub>, and BootClust (BC). BootClust results are not reported for the high-dimensional setting (-). ( $N$ : sample size,  $p$ : dimension,  $\delta$ : separating signal between clusters,  $F$ : cluster distribution.)

| parameters |      | $ \hat{K} = 7 $ (mean $\hat{K}$ ) |       |           |          |                  |                  |           |         |                  |                  | median time (sec.) |      |      |                  |                  | mean ARI |      |      |                  |                  |      |   |  |
|------------|------|-----------------------------------|-------|-----------|----------|------------------|------------------|-----------|---------|------------------|------------------|--------------------|------|------|------------------|------------------|----------|------|------|------------------|------------------|------|---|--|
| $N$        | $p$  | $\delta$                          | $F$   | pvAU      | pvBP     | SHC <sub>L</sub> | SHC <sub>2</sub> | BC        | pv      | SHC <sub>L</sub> | SHC <sub>2</sub> | BC                 | pvAU | pvBP | SHC <sub>L</sub> | SHC <sub>2</sub> | BC       | pvAU | pvBP | SHC <sub>L</sub> | SHC <sub>2</sub> | BC   |   |  |
| 350        | 10   | 4                                 | Gaus. | 0 (79.26) | 0 (1)    | 0 (2.99)         | 2 (3.75)         | 25 (5.56) | 238.6   | 4.15             | 5                | 13.28              | 0.05 | 0    | 0.34             | 0.42             | 0.59     | 0.05 | 0    | 0.34             | 0.42             | 0.59 |   |  |
| 350        | 10   | 8                                 | Gaus. | 0 (7.02)  | 0 (1)    | 56 (6.23)        | 84 (6.79)        | 90 (6.9)  | 238.92  | 4.96             | 6.08             | 12.22              | 0.45 | 0    | 0.87             | 0.95             | 0.96     | 0.45 | 0    | 0.87             | 0.95             | 0.96 |   |  |
| 350        | 10   | 12                                | Gaus. | 7 (4.68)  | 0 (1)    | 90 (6.7)         | 99 (6.96)        | 100 (7)   | 248.55  | 5.19             | 6.16             | 13.27              | 0.63 | 0    | 0.95             | 0.99             | 1        | 0.63 | 0    | 0.95             | 0.99             | 1    |   |  |
| 350        | 10   | 16                                | Gaus. | 13 (4.98) | 0 (1.12) | 97 (6.9)         | 100 (7)          | 100 (7)   | 243.66  | 5.11             | 6.08             | 12.81              | 0.7  | 0.08 | 0.99             | 1                | 1        | 0.7  | 0.08 | 0.99             | 1                | 1    |   |  |
| 350        | 10   | 20                                | Gaus. | 33 (5.54) | 0 (1.71) | 95 (6.86)        | 100 (7)          | 100 (7)   | 227.67  | 4.93             | 5.79             | 11.15              | 0.78 | 0.27 | 0.98             | 1                | 1        | 0.78 | 0.27 | 0.98             | 1                | 1    |   |  |
| 350        | 10   | 4                                 | $t_6$ | 0 (78.96) | 0 (1)    | 0 (2.01)         | 0 (2.42)         | 11 (4.76) | 248.56  | 3.83             | 4.53             | 13.39              | 0.03 | 0    | 0.17             | 0.21             | 0.41     | 0.03 | 0    | 0.17             | 0.21             | 0.41 |   |  |
| 350        | 10   | 8                                 | $t_6$ | 2 (20.95) | 0 (1)    | 25 (5.44)        | 61 (6.41)        | 72 (6.76) | 233.66  | 4.53             | 5.71             | 12.87              | 0.39 | 0    | 0.75             | 0.87             | 0.91     | 0.39 | 0    | 0.75             | 0.87             | 0.91 |   |  |
| 350        | 10   | 12                                | $t_6$ | 1 (4.85)  | 0 (1)    | 83 (6.77)        | 96 (6.97)        | 99 (6.99) | 247.27  | 5.36             | 6.23             | 13.18              | 0.5  | 0    | 0.96             | 0.98             | 0.99     | 0.5  | 0    | 0.96             | 0.98             | 0.99 |   |  |
| 350        | 10   | 16                                | $t_6$ | 1 (5.65)  | 0 (1)    | 91 (6.68)        | 96 (6.89)        | 100 (7)   | 244.72  | 5.45             | 6.25             | 13.13              | 0.59 | 0    | 0.95             | 0.98             | 1        | 0.59 | 0    | 0.95             | 0.98             | 1    |   |  |
| 350        | 10   | 20                                | $t_6$ | 13 (4.75) | 0 (1.01) | 96 (6.83)        | 100 (7)          | 100 (7)   | 236.56  | 5.25             | 6.07             | 12.97              | 0.64 | 0.03 | 0.97             | 1                | 1        | 0.64 | 0.03 | 0.97             | 1                | 1    |   |  |
| 350        | 10   | 4                                 | $t_3$ | 0 (75.42) | 0 (1)    | 0 (1.35)         | 0 (1.46)         | 1 (7.21)  | 242.54  | 2.42             | 2.77             | 12.42              | 0.02 | 0    | 0.04             | 0.05             | 0.3      | 0.02 | 0    | 0.04             | 0.05             | 0.3  |   |  |
| 350        | 10   | 8                                 | $t_3$ | 0 (63.18) | 0 (1)    | 7 (4.3)          | 23 (5.33)        | 20 (8.4)  | 242.14  | 4.54             | 5.43             | 13.09              | 0.2  | 0    | 0.54             | 0.64             | 0.79     | 0.2  | 0    | 0.54             | 0.64             | 0.79 |   |  |
| 350        | 10   | 12                                | $t_3$ | 0 (25)    | 0 (1)    | 29 (5.62)        | 55 (6.74)        | 52 (8.4)  | 234.65  | 5                | 5.84             | 13.14              | 0.47 | 0    | 0.76             | 0.87             | 0.93     | 0.47 | 0    | 0.76             | 0.87             | 0.93 |   |  |
| 350        | 10   | 16                                | $t_3$ | 0 (9.12)  | 0 (1)    | 72 (6.51)        | 67 (7.3)         | 55 (8.35) | 246.48  | 5.04             | 6.05             | 12.79              | 0.57 | 0    | 0.91             | 0.97             | 0.97     | 0.57 | 0    | 0.91             | 0.97             | 0.97 |   |  |
| 350        | 10   | 20                                | $t_3$ | 1 (6.63)  | 0 (1)    | 79 (6.63)        | 65 (7.27)        | 53 (8.37) | 240.94  | 5.07             | 6.14             | 13.02              | 0.56 | 0    | 0.93             | 0.96             | 0.98     | 0.56 | 0    | 0.93             | 0.96             | 0.98 |   |  |
| 350        | 100  | 4                                 | Gaus. | 0 (16.54) | 0 (1)    | 0 (2.46)         | 0 (3.27)         | 0 (7.7)   | 324.38  | 17.23            | 21.59            | 76.32              | 0    | 0    | 0.21             | 0.28             | 0.29     | 0    | 0    | 0.21             | 0.28             | 0.29 |   |  |
| 350        | 100  | 8                                 | Gaus. | 1 (14.02) | 0 (1)    | 26 (5.91)        | 37 (6.17)        | 0 (10)    | 319.99  | 20.6             | 22.76            | 98.47              | 0.24 | 0    | 0.82             | 0.85             | 0.82     | 0.24 | 0    | 0.82             | 0.85             | 0.82 |   |  |
| 350        | 100  | 12                                | Gaus. | 4 (5.39)  | 0 (1)    | 90 (6.73)        | 93 (6.92)        | 0 (10)    | 328.11  | 26.49            | 28.89            | 67.84              | 0.55 | 0    | 0.96             | 0.98             | 0.86     | 0.55 | 0    | 0.96             | 0.98             | 0.86 |   |  |
| 350        | 100  | 16                                | Gaus. | 14 (5.37) | 0 (1)    | 94 (6.94)        | 98 (6.98)        | 0 (10)    | 306.18  | 19.2             | 21.07            | 62.88              | 0.71 | 0    | 0.99             | 1                | 0.86     | 0.71 | 0    | 0.99             | 1                | 0.86 |   |  |
| 350        | 100  | 20                                | Gaus. | 20 (5.5)  | 0 (1)    | 98 (6.91)        | 99 (6.99)        | 0 (10)    | 320.68  | 22.76            | 24.66            | 102.17             | 0.74 | 0.01 | 0.99             | 1                | 0.86     | 0.74 | 0.01 | 0.99             | 1                | 0.86 |   |  |
| 350        | 100  | 4                                 | $t_6$ | 0 (15.4)  | 0 (1)    | 0 (1.43)         | 0 (1.44)         | 0 (3.55)  | 302.96  | 14.11            | 14.74            | 56.09              | 0    | 0    | 0.05             | 0.05             | 0.1      | 0    | 0    | 0.05             | 0.05             | 0.1  |   |  |
| 350        | 100  | 8                                 | $t_6$ | 0 (19.08) | 0 (1)    | 5 (4.9)          | 7 (5.13)         | 0 (10)    | 305.46  | 22.67            | 24.61            | 66.65              | 0.07 | 0    | 0.64             | 0.66             | 0.75     | 0.07 | 0    | 0.64             | 0.66             | 0.75 |   |  |
| 350        | 100  | 12                                | $t_6$ | 3 (10.28) | 0 (1)    | 67 (6.49)        | 76 (6.69)        | 0 (10)    | 321.59  | 19.93            | 21.76            | 100.38             | 0.4  | 0    | 0.91             | 0.94             | 0.88     | 0.4  | 0    | 0.91             | 0.94             | 0.88 |   |  |
| 350        | 100  | 16                                | $t_6$ | 8 (5.31)  | 0 (1)    | 86 (6.72)        | 92 (6.91)        | 0 (10)    | 326.31  | 24.02            | 26.72            | 102.9              | 0.56 | 0    | 0.95             | 0.98             | 0.9      | 0.56 | 0    | 0.95             | 0.98             | 0.9  |   |  |
| 350        | 100  | 20                                | $t_6$ | 10 (4.74) | 0 (1)    | 95 (6.9)         | 98 (6.98)        | 0 (10)    | 315.78  | 20.75            | 22.66            | 67.85              | 0.63 | 0    | 0.99             | 1                | 0.9      | 0.63 | 0    | 0.99             | 1                | 0.9  |   |  |
| 350        | 100  | 4                                 | $t_3$ | 1 (13.26) | 0 (1)    | 0 (2.2)          | 0 (2.23)         | 0 (9.01)  | 323.13  | 25.73            | 27.29            | 64.57              | 0    | 0    | 0                | 0                | 0.06     | 0    | 0    | 0                | 0                | 0.06 |   |  |
| 350        | 100  | 8                                 | $t_3$ | 0 (19.45) | 0 (1)    | 1 (3.26)         | 3 (3.51)         | 0 (10)    | 312.85  | 19.23            | 20.83            | 72.54              | 0.01 | 0    | 0.28             | 0.3              | 0.51     | 0.01 | 0    | 0.28             | 0.3              | 0.51 |   |  |
| 350        | 100  | 12                                | $t_3$ | 0 (20.49) | 0 (1)    | 9 (5.31)         | 22 (5.92)        | 0 (10)    | 321.97  | 26.29            | 28.68            | 77.96              | 0.08 | 0    | 0.63             | 0.68             | 0.82     | 0.08 | 0    | 0.63             | 0.68             | 0.82 |   |  |
| 350        | 100  | 16                                | $t_3$ | 3 (14.84) | 0 (1)    | 36 (6.19)        | 43 (6.97)        | 0 (10)    | 321.12  | 22.74            | 24.58            | 70.48              | 0.32 | 0    | 0.82             | 0.88             | 0.92     | 0.32 | 0    | 0.82             | 0.88             | 0.92 |   |  |
| 350        | 100  | 20                                | $t_3$ | 5 (9.09)  | 0 (1)    | 60 (6.74)        | 43 (7.39)        | 0 (10)    | 328.22  | 19.8             | 21.85            | 75.87              | 0.49 | 0    | 0.92             | 0.95             | 0.97     | 0.49 | 0    | 0.92             | 0.95             | 0.97 |   |  |
| 350        | 1000 | 5                                 | Gaus. | 15 (9.62) | 0 (1)    | 0 (1.28)         | 0 (1.32)         | -         | 1294.04 | 119.57           | 126.47           | -                  | 0    | 0    | 0.04             | 0.04             | -        | 0    | 0    | 0.04             | 0.04             | -    |   |  |
| 350        | 1000 | 10                                | Gaus. | 1 (13.19) | 0 (1)    | 2 (5)            | 22 (5.76)        | -         | 1211.38 | 222.52           | 240.64           | -                  | 0.01 | 0    | 0.67             | 0.74             | -        | 0.01 | 0    | 0.67             | 0.74             | -    |   |  |
| 350        | 1000 | 15                                | Gaus. | 7 (8.57)  | 0 (1)    | 64 (6.54)        | 80 (6.7)         | -         | 1294.04 | 184.71           | 198.92           | -                  | 0.37 | 0    | 0.92             | 0.94             | -        | 0.37 | 0    | 0.92             | 0.94             | -    |   |  |
| 350        | 1000 | 20                                | Gaus. | 8 (6.02)  | 0 (1)    | 87 (6.81)        | 95 (6.95)        | -         | 1248.75 | 240.04           | 263.66           | -                  | 0.62 | 0    | 0.97             | 0.99             | -        | 0.62 | 0    | 0.97             | 0.99             | -    |   |  |
| 350        | 1000 | 25                                | Gaus. | 12 (5.08) | 0 (1)    | 94 (6.84)        | 98 (6.95)        | -         | 1315.66 | 184.7            | 196.18           | -                  | 0.7  | 0    | 0.97             | 0.99             | -        | 0.7  | 0    | 0.97             | 0.99             | -    |   |  |
| 350        | 1000 | 5                                 | $t_6$ | 12 (8.26) | 0 (1)    | 0 (1.02)         | 0 (1.03)         | -         | 998.98  | 87.48            | 92.81            | -                  | 0    | 0    | 0                | 0                | -        | 0    | 0    | 0                | 0                | 0    | - |  |
| 350        | 1000 | 10                                | $t_6$ | 7 (11)    | 0 (1)    | 0 (3.71)         | 0 (3.86)         | -         | 1220.82 | 170.81           | 184.09           | -                  | 0    | 0    | 0.44             | 0.45             | -        | 0    | 0    | 0.44             | 0.45             | -    |   |  |
| 350        | 1000 | 15                                | $t_6$ | 5 (11.26) | 0 (1)    | 33 (5.94)        | 34 (6.09)        | -         | 1134.6  | 176.73           | 189.43           | -                  | 0.18 | 0    | 0.82             | 0.84             | -        | 0.18 | 0    | 0.82             | 0.84             | -    |   |  |
| 350        | 1000 | 20                                | $t_6$ | 8 (7.17)  | 0 (1)    | 78 (6.77)        | 78 (6.77)        | -         | 1325.48 | 237.55           | 256.75           | -                  | 0.47 | 0    | 0.96             | 0.96             | -        | 0.47 | 0    | 0.96             | 0.96             | -    |   |  |
| 350        | 1000 | 25                                | $t_6$ | 7 (5.95)  | 0 (1)    | 93 (6.9)         | 96 (6.96)        | -         | 1294.97 | 182.46           | 199.81           | -                  | 0.61 | 0    | 0.98             | 0.99             | -        | 0.61 | 0    | 0.98             | 0.99             | -    |   |  |
| 350        | 1000 | 5                                 | $t_3$ | 8 (5.09)  | 0 (1)    | 3 (3.91)         | 3 (3.9)          | -         | 1318.84 | 324.41           | 341.81           | -                  | 0    | 0    | 0                | 0                | -        | 0    | 0    | 0                | 0                | 0    | - |  |
| 350        | 1000 | 10                                | $t_3$ | 11 (6.23) | 0 (1)    | 3 (3.62)         | 3 (3.72)         | -         | 1403.09 | 257.03           | 276.48           | -                  | 0    | 0    | 0.08             | 0.09             | -        | 0    | 0    | 0.08             | 0.09             | -    |   |  |
| 350        | 1000 | 15                                | $t_3$ | 7 (9.01)  | 0 (1)    | 10 (4.64)        | 12 (4.72)        | -         | 1306.18 | 256.93           | 263.95           | -                  | 0    | 0    | 0.41             | 0.42             | -        | 0    | 0    | 0.41             | 0.42             | -    |   |  |
| 350        | 1000 | 20                                | $t_3$ | 5 (9.7)   | 0 (1)    | 17 (5.87)        | 17 (6.04)        | -         | 934.4   | 195.34           | 209.9            | -                  | 0.11 | 0    | 0.68             | 0.69             | -        | 0.11 | 0    | 0.68             | 0.69             | -    |   |  |
| 350        | 1000 | 25                                | $t_3$ | 11 (8.64) | 0 (1)    | 27 (6.16)        | 32 (6.67)        | -         | 1111.95 | 244.85           | 268.45           | -                  | 0.37 | 0    | 0.79             | 0.82             | -        | 0.37 | 0    | 0.79             | 0.82             | -    |   |  |

**Table S24:**  $K = 8$  simulation results with equal sized clusters. Each setting was replicated 100 times. For each setting, the number of replications detecting the correct number of clusters ( $|\hat{K} = 8|$ ), the mean number of significant clusters (mean  $\hat{K}$ ), median computing time, and mean adjusted Rand Index (ARI) are reported for pvcLust AU  $p$ -values (pvAU), BP  $p$ -values (pvBP), SHC<sub>L</sub>, SHC<sub>2</sub>, and BootClust (BC). BootClust results are not reported for the high-dimensional setting (-). ( $N$ : sample size,  $p$ : dimension,  $\delta$ : separating signal between clusters,  $F$ : cluster distribution.)

| parameters |      | $ \hat{K} = 8 $ (mean $\hat{K}$ ) |       |            |          |                  |                  |           |         |                  |                  | median time (sec.) |      |      |                  |                  | mean ARI |      |      |                  |                  |      |
|------------|------|-----------------------------------|-------|------------|----------|------------------|------------------|-----------|---------|------------------|------------------|--------------------|------|------|------------------|------------------|----------|------|------|------------------|------------------|------|
| $N$        | $p$  | $\delta$                          | $F$   | pvAU       | pvBP     | SHC <sub>L</sub> | SHC <sub>2</sub> | BC        | pv      | SHC <sub>L</sub> | SHC <sub>2</sub> | BC                 | pvAU | pvBP | SHC <sub>L</sub> | SHC <sub>2</sub> | BC       | pvAU | pvBP | SHC <sub>L</sub> | SHC <sub>2</sub> | BC   |
| 400        | 10   | 4                                 | Gaus. | 0 (91.67)  | 0 (1)    | 0 (3.18)         | 1 (4.06)         | 10 (6.26) | 285.66  | 4.92             | 5.85             | 15.36              | 0.05 | 0    | 0.33             | 0.41             | 0.59     | 0.05 | 0    | 0.33             | 0.41             | 0.59 |
| 400        | 10   | 8                                 | Gaus. | 0 (5.06)   | 0 (1)    | 55 (6.99)        | 85 (7.79)        | 91 (7.91) | 257.84  | 4.78             | 6.14             | 12.32              | 0.39 | 0    | 0.87             | 0.96             | 0.97     | 0.39 | 0    | 0.87             | 0.96             | 0.97 |
| 400        | 10   | 12                                | Gaus. | 3 (4.85)   | 0 (1)    | 98 (7.92)        | 99 (7.96)        | 100 (8)   | 289.68  | 6.24             | 7.06             | 15.54              | 0.58 | 0    | 0.99             | 0.99             | 1        | 0.58 | 0    | 0.99             | 0.99             | 1    |
| 400        | 10   | 16                                | Gaus. | 21 (6.04)  | 0 (1.29) | 98 (7.95)        | 100 (8)          | 100 (8)   | 293.42  | 6.66             | 7.61             | 16.96              | 0.75 | 0.18 | 0.99             | 1                | 1        | 0.75 | 0.18 | 0.99             | 1                | 1    |
| 400        | 10   | 20                                | Gaus. | 33 (6.47)  | 3 (3.16) | 97 (7.84)        | 100 (8)          | 100 (8)   | 290.11  | 6.52             | 7.36             | 16.89              | 0.8  | 0.49 | 0.98             | 1                | 1        | 0.8  | 0.49 | 0.98             | 1                | 1    |
| 400        | 10   | 4                                 | $t_6$ | 0 (91.95)  | 0 (1)    | 0 (2.19)         | 0 (2.51)         | 9 (5.6)   | 292.15  | 5.21             | 5.75             | 17.66              | 0.03 | 0    | 0.17             | 0.19             | 0.43     | 0.03 | 0    | 0.17             | 0.19             | 0.43 |
| 400        | 10   | 8                                 | $t_6$ | 0 (24.48)  | 0 (1)    | 18 (6.32)        | 63 (7.5)         | 74 (7.82) | 296.2   | 6.54             | 7.58             | 17.29              | 0.41 | 0    | 0.77             | 0.89             | 0.92     | 0.41 | 0    | 0.77             | 0.89             | 0.92 |
| 400        | 10   | 12                                | $t_6$ | 0 (4.46)   | 0 (1)    | 83 (7.47)        | 96 (7.87)        | 98 (7.98) | 240.5   | 5.74             | 6.42             | 14.25              | 0.43 | 0    | 0.93             | 0.98             | 0.99     | 0.43 | 0    | 0.93             | 0.98             | 0.99 |
| 400        | 10   | 16                                | $t_6$ | 1 (4.74)   | 0 (1)    | 91 (7.84)        | 98 (7.98)        | 99 (7.99) | 302.73  | 6.28             | 7.46             | 16.97              | 0.58 | 0    | 0.98             | 1                | 1        | 0.58 | 0    | 0.98             | 1                | 1    |
| 400        | 10   | 20                                | $t_6$ | 9 (5.68)   | 0 (1.03) | 99 (7.95)        | 100 (8)          | 100 (8)   | 247.22  | 5.84             | 6.7              | 14.22              | 0.68 | 0.05 | 0.99             | 1                | 1        | 0.68 | 0.05 | 0.99             | 1                | 1    |
| 400        | 10   | 4                                 | $t_3$ | 0 (88.99)  | 0 (1)    | 0 (1.28)         | 0 (1.34)         | 0 (8.05)  | 295.22  | 3.26             | 3.56             | 17.84              | 0.02 | 0    | 0.02             | 0.03             | 0.29     | 0.02 | 0    | 0.02             | 0.03             | 0.29 |
| 400        | 10   | 8                                 | $t_3$ | 0 (74.68)  | 0 (1)    | 2 (4.26)         | 13 (5.54)        | 23 (8.96) | 289.16  | 6.24             | 7.38             | 17.53              | 0.17 | 0    | 0.46             | 0.58             | 0.8      | 0.17 | 0    | 0.46             | 0.58             | 0.8  |
| 400        | 10   | 12                                | $t_3$ | 2 (29.68)  | 0 (1)    | 32 (6.3)         | 53 (7.89)        | 53 (8.76) | 294.11  | 6.82             | 7.93             | 17.38              | 0.5  | 0    | 0.76             | 0.9              | 0.94     | 0.5  | 0    | 0.76             | 0.9              | 0.94 |
| 400        | 10   | 16                                | $t_3$ | 2 (8.56)   | 0 (1)    | 75 (7.52)        | 67 (8.33)        | 58 (8.81) | 292.4   | 6.62             | 7.58             | 17.2               | 0.49 | 0    | 0.92             | 0.98             | 0.98     | 0.49 | 0    | 0.92             | 0.98             | 0.98 |
| 400        | 10   | 20                                | $t_3$ | 5 (6.17)   | 0 (1)    | 87 (7.65)        | 75 (8.24)        | 61 (8.78) | 291.11  | 6.63             | 7.46             | 17.13              | 0.53 | 0    | 0.95             | 0.98             | 0.99     | 0.53 | 0    | 0.95             | 0.98             | 0.99 |
| 400        | 100  | 4                                 | Gaus. | 0 (19.87)  | 0 (1)    | 0 (2.56)         | 0 (3.58)         | 0 (7.66)  | 374.96  | 20.42            | 23.98            | 81.52              | 0    | 0    | 0.18             | 0.25             | 0.31     | 0    | 0    | 0.18             | 0.25             | 0.31 |
| 400        | 100  | 8                                 | Gaus. | 0 (16.48)  | 0 (1)    | 31 (6.92)        | 43 (7.23)        | 0 (10)    | 363.33  | 33.34            | 36.47            | 101.84             | 0.27 | 0    | 0.85             | 0.87             | 0.87     | 0.27 | 0    | 0.85             | 0.87             | 0.87 |
| 400        | 100  | 12                                | Gaus. | 4 (5.42)   | 0 (1)    | 87 (7.87)        | 91 (7.91)        | 0 (10)    | 427.08  | 25.59            | 27.7             | 127.09             | 0.55 | 0    | 0.98             | 0.99             | 0.92     | 0.55 | 0    | 0.98             | 0.99             | 0.92 |
| 400        | 100  | 16                                | Gaus. | 10 (5.68)  | 0 (1)    | 93 (7.84)        | 97 (7.92)        | 0 (10)    | 434.55  | 31.94            | 33.93            | 127.23             | 0.7  | 0    | 0.98             | 0.99             | 0.92     | 0.7  | 0    | 0.98             | 0.99             | 0.92 |
| 400        | 100  | 20                                | Gaus. | 18 (6.26)  | 0 (1)    | 97 (7.89)        | 100 (8)          | 0 (10)    | 435.14  | 30.58            | 33.22            | 127.79             | 0.78 | 0.01 | 0.99             | 1                | 0.92     | 0.78 | 0.01 | 0.99             | 1                | 0.92 |
| 400        | 100  | 4                                 | $t_6$ | 0 (19.03)  | 0 (1)    | 0 (1.55)         | 0 (1.55)         | 0 (3.56)  | 363.62  | 18.47            | 19.36            | 59.61              | 0    | 0    | 0.06             | 0.06             | 0.09     | 0    | 0    | 0.06             | 0.06             | 0.09 |
| 400        | 100  | 8                                 | $t_6$ | 0 (23.39)  | 0 (1)    | 3 (5.75)         | 6 (6.23)         | 0 (10)    | 372.79  | 27.14            | 29.05            | 103.36             | 0.05 | 0    | 0.68             | 0.72             | 0.82     | 0.05 | 0    | 0.68             | 0.72             | 0.82 |
| 400        | 100  | 12                                | $t_6$ | 6 (9.75)   | 0 (1)    | 60 (7.46)        | 69 (7.62)        | 0 (10)    | 389.26  | 36.14            | 38.3             | 104.53             | 0.44 | 0    | 0.92             | 0.94             | 0.93     | 0.44 | 0    | 0.92             | 0.94             | 0.93 |
| 400        | 100  | 16                                | $t_6$ | 2 (5.07)   | 0 (1)    | 89 (7.79)        | 94 (7.84)        | 0 (10)    | 426.85  | 26.67            | 28.35            | 85.9               | 0.56 | 0    | 0.97             | 0.98             | 0.95     | 0.56 | 0    | 0.97             | 0.98             | 0.95 |
| 400        | 100  | 20                                | $t_6$ | 9 (5.56)   | 0 (1)    | 96 (7.93)        | 99 (7.99)        | 0 (10)    | 381.52  | 25.26            | 27.32            | 95.78              | 0.68 | 0    | 0.99             | 1                | 0.94     | 0.68 | 0    | 0.99             | 1                | 0.94 |
| 400        | 100  | 4                                 | $t_3$ | 1 (14.59)  | 0 (1)    | 0 (2.36)         | 0 (2.36)         | 0 (9.01)  | 414.51  | 33.28            | 34.64            | 76.35              | 0    | 0    | 0                | 0                | 0.05     | 0    | 0    | 0                | 0                | 0.05 |
| 400        | 100  | 8                                 | $t_3$ | 0 (23.16)  | 0 (1)    | 0 (3.79)         | 2 (4.3)          | 0 (10)    | 445.4   | 24.27            | 26.42            | 106.95             | 0.01 | 0    | 0.3              | 0.33             | 0.5      | 0.01 | 0    | 0.3              | 0.33             | 0.5  |
| 400        | 100  | 12                                | $t_3$ | 0 (24.31)  | 0 (1)    | 12 (6.16)        | 20 (6.95)        | 0 (10)    | 380.76  | 33.72            | 36.64            | 91.18              | 0.08 | 0    | 0.67             | 0.72             | 0.83     | 0.08 | 0    | 0.67             | 0.72             | 0.83 |
| 400        | 100  | 16                                | $t_3$ | 3 (17.12)  | 0 (1)    | 40 (7.09)        | 41 (8.14)        | 0 (10)    | 443.57  | 27.74            | 30               | 122.97             | 0.39 | 0    | 0.83             | 0.9              | 0.94     | 0.39 | 0    | 0.83             | 0.9              | 0.94 |
| 400        | 100  | 20                                | $t_3$ | 4 (9.9)    | 0 (1)    | 59 (7.73)        | 42 (8.66)        | 0 (10)    | 365.52  | 26.29            | 28.51            | 102.98             | 0.52 | 0    | 0.91             | 0.96             | 0.97     | 0.52 | 0    | 0.91             | 0.96             | 0.97 |
| 400        | 1000 | 5                                 | Gaus. | 11 (10.43) | 0 (1)    | 0 (1.28)         | 0 (1.32)         | -         | 1691.74 | 158.63           | 167.07           | -                  | 0    | 0    | 0.03             | 0.03             | -        | 0    | 0    | 0.03             | 0.03             | -    |
| 400        | 1000 | 10                                | Gaus. | 2 (15.05)  | 0 (1)    | 6 (5.88)         | 25 (6.71)        | -         | 1874.58 | 239.22           | 264.73           | -                  | 0.02 | 0    | 0.7              | 0.76             | -        | 0.02 | 0    | 0.7              | 0.76             | -    |
| 400        | 1000 | 15                                | Gaus. | 4 (8.98)   | 0 (1)    | 77 (7.66)        | 92 (7.88)        | -         | 1620.74 | 262.55           | 279.85           | -                  | 0.41 | 0    | 0.95             | 0.97             | -        | 0.41 | 0    | 0.95             | 0.97             | -    |
| 400        | 1000 | 20                                | Gaus. | 11 (6.24)  | 0 (1)    | 93 (7.93)        | 98 (7.98)        | -         | 1455.25 | 239.3            | 255.36           | -                  | 0.69 | 0    | 0.99             | 0.99             | -        | 0.69 | 0    | 0.99             | 0.99             | -    |
| 400        | 1000 | 25                                | Gaus. | 12 (5.74)  | 0 (1)    | 97 (7.91)        | 100 (8)          | -         | 1629.73 | 264.83           | 273.85           | -                  | 0.7  | 0    | 0.99             | 1                | -        | 0.7  | 0    | 0.99             | 1                | -    |
| 400        | 1000 | 5                                 | $t_6$ | 16 (9.81)  | 0 (1)    | 0 (1.02)         | 0 (1.03)         | 0 (10)    | 1660.07 | 157.77           | 164.52           | -                  | 0    | 0    | 0                | 0                | -        | 0    | 0    | 0                | 0                | -    |
| 400        | 1000 | 10                                | $t_6$ | 6 (12.99)  | 0 (1)    | 0 (4.4)          | 1 (4.54)         | 0 (10)    | 1648.44 | 223.97           | 241.77           | -                  | 0    | 0    | 0.46             | 0.47             | -        | 0    | 0    | 0.46             | 0.47             | -    |
| 400        | 1000 | 15                                | $t_6$ | 2 (13.92)  | 0 (1)    | 35 (7.17)        | 43 (7.28)        | 0 (10)    | 1570.98 | 255.36           | 279.31           | -                  | 0.17 | 0    | 0.87             | 0.89             | -        | 0.17 | 0    | 0.87             | 0.89             | -    |
| 400        | 1000 | 20                                | $t_6$ | 9 (7.76)   | 0 (1)    | 84 (7.76)        | 85 (7.8)         | 0 (10)    | 1541.65 | 247.08           | 267.1            | -                  | 0.51 | 0    | 0.97             | 0.97             | -        | 0.51 | 0    | 0.97             | 0.97             | -    |
| 400        | 1000 | 25                                | $t_6$ | 6 (5.63)   | 0 (1)    | 96 (7.86)        | 96 (7.9)         | 0 (10)    | 1697.77 | 284.26           | 300.82           | -                  | 0.64 | 0    | 0.98             | 0.99             | -        | 0.64 | 0    | 0.98             | 0.99             | -    |
| 400        | 1000 | 5                                 | $t_3$ | 9 (5.1)    | 0 (1)    | 3 (4.09)         | 3 (4.08)         | 0 (10)    | 1316.81 | 544.11           | 567.2            | -                  | 0    | 0    | 0                | 0                | -        | 0    | 0    | 0                | 0                | -    |
| 400        | 1000 | 10                                | $t_3$ | 7 (6.38)   | 0 (1)    | 0 (3.91)         | 0 (3.9)          | 0 (10)    | 1351.71 | 423.56           | 442.09           | -                  | 0    | 0    | 0.07             | 0.07             | -        | 0    | 0    | 0.07             | 0.07             | -    |
| 400        | 1000 | 15                                | $t_3$ | 3 (10.07)  | 0 (1)    | 6 (5.53)         | 8 (5.7)          | 0 (10)    | 1387.78 | 340.85           | 360.39           | -                  | 0.01 | 0    | 0.44             | 0.45             | -        | 0.01 | 0    | 0.44             | 0.45             | -    |
| 400        | 1000 | 20                                | $t_3$ | 6 (11.95)  | 0 (1)    | 8 (6.41)         | 14 (6.79)        | 0 (10)    | 1342.06 | 248.16           | 269.51           | -                  | 0.13 | 0    | 0.67             | 0.7              | -        | 0.13 | 0    | 0.67             | 0.7              | -    |
| 400        | 1000 | 25                                | $t_3$ | 8 (8.93)   | 0 (1)    | 32 (7.4)         | 41 (7.86)        | 0 (10)    | 1618.96 | 273.9            | 302.78           | -                  | 0.32 | 0    | 0.82             | 0.85             | -        | 0.32 | 0    | 0.82             | 0.85             | -    |

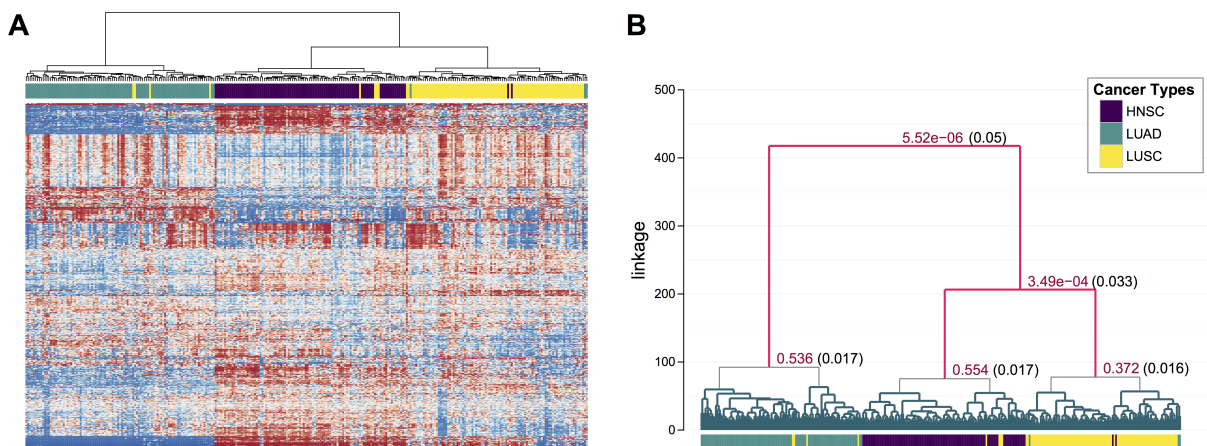

Figure S1: Analysis of gene expression for 300 LUAD, LUSC, and HNSC samples. (A) Heatmap of log-transformed gene expression for the 300 samples (columns), clustered by Ward's linkage. (B) Dendrogram with corresponding SHC  $p$ -values (red) and  $\alpha^*$  cutoffs (black) given only at nodes tested according to the FWER controlling procedure at  $\alpha = 0.05$ .

## Web Appendix C: Multi-Cancer Gene Expression Dataset

A dataset of 300 samples was constructed by combining 100 samples from each of head and neck squamous cell carcinoma (HNSC), lung squamous cell carcinoma (LUSC), and lung adenocarcinoma (LUAD), all obtained from The Cancer Genome Atlas (TCGA) project (The Cancer Genome Atlas Research Network, 2012, 2014). Gene expression was estimated for 20,531 genes from RNA-seq data using RSEM (Li and Dewey, 2011), as described in the TCGA RNA-seq v2 pipeline (<https://wiki.nci.nih.gov/display/TCGA/RNASeq+Version+2>). To adjust for technical effects of the data collection process, expression values were first normalized using the upper-quartile procedure of Bullard et al. (2010). Then, all expression values of zero were replaced by the smallest non-zero expression value across all genes and samples. A subset of 500 most variably expressed genes were selected according to the median absolute deviation about the median (MAD) expression across all samples. Finally, SHC was applied to the log-transformed expression levels at the 500 most variable loci. Similar results were also obtained with the 100, 1000, and 2000 most variable genes.

In Figure S1A, the log-transformed expression values are visualized using a heatmap,



with rows corresponding to genes, and columns corresponding to samples. Lower and higher expression values are shown in blue and red, respectively. For easier visual interpretation, rows and columns of the heatmap were independently clustered using Ward’s linkage clustering. The corresponding dendrogram and cancer type labels are shown above the heatmap. The dendrogram and labels in Panel A of Figure S1 are reproduced in Panel B, along with the SHC  $p$ -values (red) and modified significance cutoffs (black) at nodes tested according to the FWER controlling procedure. Diagnostic plots investigating the null Gaussian and factor analysis model assumptions at the first two nodes are shown in Figure S2. Moderately heavy tails are observed in the density plots. However, as in the BRCA dataset, these may be partially attributed to the factor analysis model illustrated in the eigenvalue plots. Ward’s linkage clustering correctly separates the three cancer types, with the exception of 8 LUSC samples, 2 HNSC samples, and 3 LUAD samples. The resulting ARI is 0.87, highlighting the strong separation between the three cancer types. Interestingly, the LUSC and HNSC samples cluster prior to joining with the LUAD samples, suggesting the greater molecular similarity between squamous cell tumors of different sites, than different cancers of the lung. This agrees with the recently identified genomic similarity of the two tumors reported in Hoadley et al. (2014). Furthermore, we note that no HNSC and LUAD samples are jointly clustered, highlighting the clear difference between tumors of both distinct histology and site. As shown in Figure S1B, statistically significant evidence of clustering was determined at the top two nodes, with respective Gaussian-fit  $p$ -values  $5.52e - 6$  and  $3.49e - 4$  at the modified significance cutoffs,  $\alpha_1^* = 0.05$  and  $\alpha_2^* = 0.033$ . Additionally, the three candidate nodes corresponding to splitting each of the cancer types all give insignificant results, suggesting no further clustering in the cohort. We note that when analyzed using `pvclust`, no statistically significant evidence of clustering was found, with AU  $p$ -values of 0.14, 0.54, and 0.48 obtained at the three nodes corresponding to primarily LUAD, HNSC and LUSC samples. Finally, when the `BootClust` approach was applied as described in Section 5, the maximum of 10 clusters was predicted.

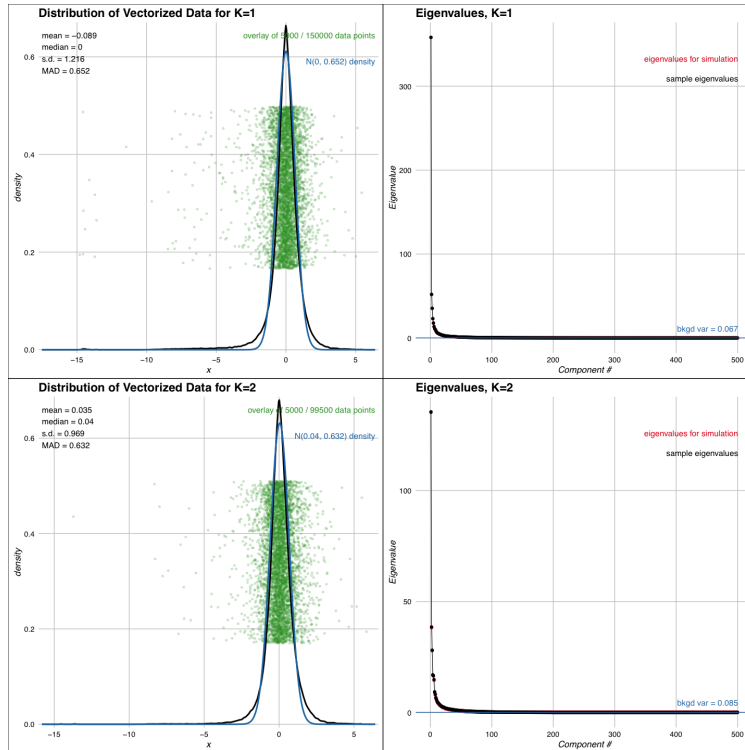

Figure S2: SHC diagnostic plots for multi-cancer gene expression dataset. Diagnostic plots are shown for the hypothesis test performed at the top two nodes:  $j = 1$  (top row) and  $j = 2$  (bottom row). A kernel density estimate for the raw data (black) and the best-fit Gaussian (blue) are shown in the left panels. Sample eigenvalues (black) and eigenvalues used for simulation (red) are shown in the right panels.

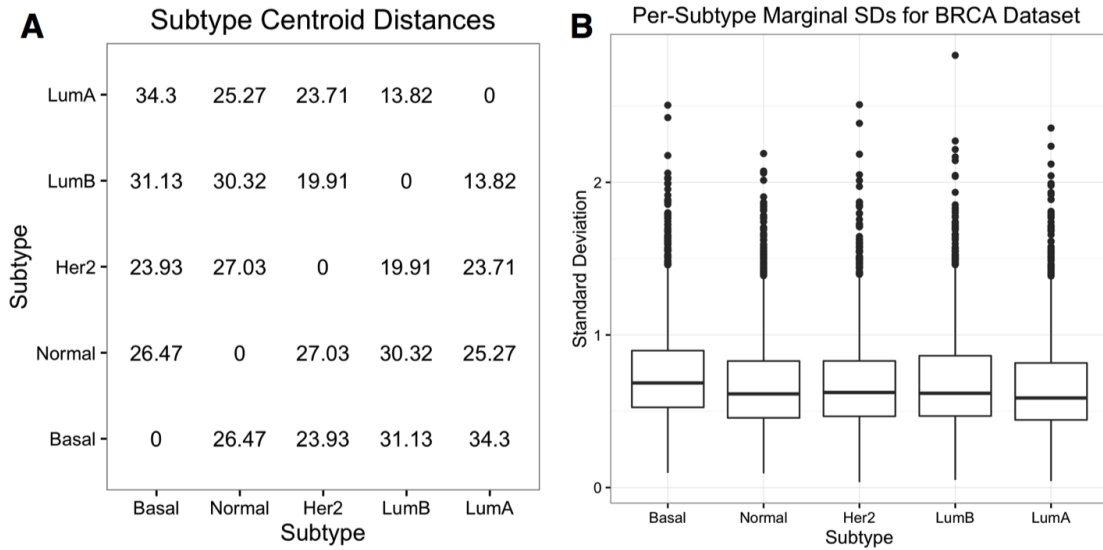

Figure S3: Distribution statistics for BRCA gene expression dataset for comparison with simulation setting parameters. (A) Subtype centroid distances to be compared with  $\delta$  parameter used in simulations. (B) Distribution of marginal standard deviations (SDs) calculated for each subtype. Marginal SDs of  $\sigma = 1$  were used in all non-null simulation settings. The values suggest the  $\delta$  and  $\sigma$  values used in simulations fall within realistic ranges.

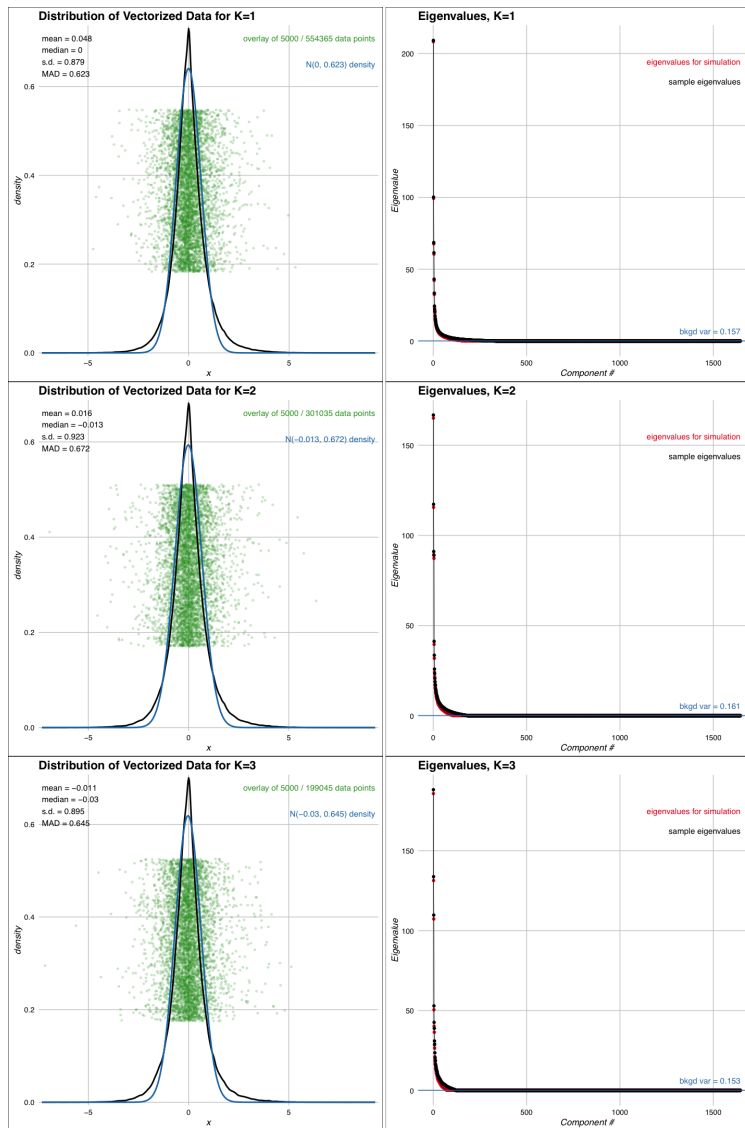

Figure S4: SHC diagnostic plots for BRCA gene expression dataset. Diagnostic plots are shown for the hypothesis test performed at the top three nodes:  $j = 1$  (top row),  $j = 2$  (middle row), and  $j = 3$  (bottom row). A kernel density estimate for the raw data (black) and the best-fit Gaussian (blue) are shown in the left panels. Sample eigenvalues (black) and eigenvalues used for simulation (red) are shown in the right panels.

## Web Appendix D: Null Covariance Estimation

As mentioned in Section 2.2, several approaches have been proposed for estimating the low-level background noise,  $\sigma_b^2$ , and the  $w$  non-zero entries of  $\Lambda_0$ , including the hard-threshold, soft-threshold, and sample-based approaches (Liu et al., 2008; Huang et al., 2015). Briefly, given the eigenvalues of the sample covariance matrix,  $\hat{\lambda}_j$ , and an estimate of the background noise,  $\hat{\sigma}_b^2$ , the hard and soft approaches estimate the diagonal entries of  $\Lambda$  to be  $\max\{\hat{\lambda}_j, \hat{\sigma}_b^2\}$  and  $\max\{\hat{\lambda}_j - \tau, \hat{\sigma}_b^2\}$ , respectively, with tuning parameter  $\tau \geq 0$ . The sample-based approach simply estimates the diagonal entries of  $\Lambda$  by the  $\hat{\lambda}_j$ . In the original SigClust paper, Liu et al. (2008) proposed estimating the background noise by:

$$\hat{\sigma}_{\text{RAW}} = \frac{MAD_{p \cdot N \text{ data}}}{MAD_{N(0,1)}},$$

where  $MAD_{p \cdot N \text{ data}}$  is used to denote the median absolute deviation about the median (MAD) computed from the  $p \cdot N$  total entries of the original data matrix, and  $MAD_{N(0,1)}$  is used to denote the MAD of a standard Gaussian distribution.

The  $\hat{\sigma}_{\text{RAW}}$  estimator relies on the assumption that a majority of the  $p$  variables are pure noise, as in microarray studies where expression is measured for thousands of genes, most of which are of no interest. However, when this assumption does not hold, and the few directions of true signal lie across a large number of variables,  $\hat{\sigma}_{\text{RAW}}$  can vastly overestimate the noise level and produce poor estimates of  $\Lambda$ . To address this problem, when  $N \ll p$  we propose estimating  $\sigma_b$  from the  $N(N - 1)$  non-zero principal component (PC) scores of the  $p \times N$  data matrix. Intuitively, since the directions of true signal approximately lie within the first few PC directions, a robust estimate of spread based on the PC scores should accurately target the background noise. In this way, the estimator is a natural modification of  $\hat{\sigma}_{\text{RAW}}$ .

Specifically, we propose the new estimator:

$$\hat{\sigma}_{\text{PC}} = \frac{MAD_{N(N-1) \text{ scaled PC scores}}}{MAD_{N(0,1)}}.$$

where  $MAD_{N(N-1) \text{ scaled PC scores}}$  is used to denote the MAD of the  $N(N-1)$  non-zero PC scores scaled by  $(\frac{p}{N-1})^{1/2}$ . The scaling factor is obtained by noting that the variance of the PC scores for  $N$  samples drawn from a  $p$ -dimensional spherical distribution with covariance  $\sigma_b^2 \mathbf{I}_p$  is precisely  $(\frac{p}{N-1})\sigma_b^2$ .

Since  $\hat{\sigma}_{\text{PC}}$  relies on a PC decomposition of the data, when the true signal is relatively weak, the approach may over-estimate  $\sigma_b$ , similar to  $\hat{\sigma}_{\text{RAW}}$ . Thus, we propose using:

$$\hat{\sigma}_{\min} = \min\{\hat{\sigma}_{\text{RAW}}, \hat{\sigma}_{\text{PC}}\},$$

as a more conservative estimator of  $\sigma_b$ . For all moderate and high dimensional simulations in Section 5, and real data analyses in Section 6, we use  $\hat{\sigma}_{\min}$  along with the soft thresholding approach of Huang et al. (2015).

## References

- Borysov, P., Hannig, J., and Marron, J. S. (2014). Asymptotics of hierarchical clustering for growing dimension. *Journal of Multivariate Analysis* **124**, 465–479.
- Bullard, J. H., Purdom, E., Hansen, K. D., and Dudoit, S. (2010). Evaluation of statistical methods for normalization and differential expression in mRNA-Seq experiments. *BMC Bioinformatics* **11**, 94.
- Hoadley, K. A., . . . , and Stuart, J. M. (2014). Multiplatform analysis of 12 cancer types reveals molecular classification within and across tissues of origin. *Cell* **158**, 929–944.
- Huang, H., Liu, Y., Yuan, M., and Marron, J. S. (2015). Statistical significance of clustering using soft thresholding. *Journal of Computational and Graphical Statistics* **24**, 975–993.
- Li, B. and Dewey, C. N. (2011). RSEM: accurate transcript quantification from RNA-Seq data with or without a reference genome. *BMC Bioinformatics* **12**, 323.
- Liu, Y., Hayes, D. N., Nobel, A. B., and Marron, J. S. (2008). Statistical significance of clustering for high-dimension, low-sample size data. *Journal of the American Statistical Association* **103**, 1281–1293.
- Maitra, R., Melnykov, V., and Lahiri, S. N. (2012). Bootstrapping for significance of compact clusters in multidimensional datasets. *Journal of the American Statistical Association* **107**, 378–392.
- The Cancer Genome Atlas Research Network (2012). Comprehensive genomic characterization of squamous cell lung cancers. *Nature* **489**, 519–525.
- The Cancer Genome Atlas Research Network (2014). Comprehensive molecular profiling of lung adenocarcinoma. *Nature* **511**, 543–550.
